# Supplementary material for: Artificial intelligence platform, RADR®, aids in the discovery of DNA damaging agent for the ultra-rare cancer Atypical Teratoid Rhabdoid Tumors
Source: Frontiers journal article supplement (doi:10.3389/fddsv.2022.1033395), 2022-10-11
Supplement: Table_3.XLSX [file Table_3.XLSX]

## Sheet: NCI60
Data Type	Drug ID	Name	MOA	CLINICAL.STATUS	Correlation	P-Value	FDR
act	639174	Camptothecin Derivative	TOP1		0.83	4.23e-16	1.01e-11
act	681644	Camptothecin Derivative	TOP1		0.797	4.53e-14	4.98e-10
act	603074	9-Nitro-10-methoxy-20(S)-camptothecin	TOP1		0.837	7.22e-14	4.98e-10
act	135758	Piperazinedione	A7		0.791	8.94e-14	4.98e-10
act	603071	Aminocamptothecin	TOP1		0.789	1.12e-13	4.98e-10
act	681646	Camptothecin Derivative	TOP1		0.787	1.47e-13	4.98e-10
act	681636	Camptothecin Derivative	TOP1		0.799	1.52e-13	4.98e-10
act	681633	Camptothecin Derivative	TOP1		0.786	1.68e-13	4.98e-10
act	681643	Camptothecin Derivative	TOP1		0.784	2.1e-13	5.56e-10
act	681640	Camptothecin Derivative	TOP1		0.782	2.74e-13	6.52e-10
act	166199	phosphinic amide, p,p-bis(1-aziridinyl)-n-tricyclo[3.3.1...			0.78	3.29e-13	7.12e-10
act	606497	Camptothecin Derivative	TOP1		0.779	3.88e-13	7.69e-10
act	609699	Topotecan	TOP1	FDA approved	0.776	4.99e-13	8.77e-10
act	34462	Uracil mustard	A7|AlkAg	FDA approved	0.776	5.17e-13	8.77e-10
act	619232	9-Glycinamido-20(RS)-camptothecin hydrochloride	TOP1		0.775	5.96e-13	9.44e-10
act	9706	Triethylenemelamine	A7|AlkAg	FDA approved	0.773	7.22e-13	1.07e-09			Duplicate Drugs IDs in AlkAg MoA
act	603076	9-Nitro-10-hydroxy-20(S)-camptothecin	TOP1		0.817	8.18e-13	1.14e-09
act	618939	Camptothecin Derivative	TOP1		0.771	8.9e-13	1.18e-09
act	603075	9-Amino-10-methoxy-20(S)-camptothecin	NA	NA	0.814	1.09e-12	1.36e-09
act	759878	Irinotecan	TOP1	FDA approved	0.77	1.58e-12	1.88e-09
act	35915	erythritol aziridine			0.772	2.05e-12	2.29e-09
act	619031	Analog of CC-1065	NA	NA	0.767	2.12e-12	2.29e-09
act	606499	Camptothecin Derivative	TOP1		0.762	2.35e-12	2.43e-09
act	344007	Piperazine	A7		0.761	2.52e-12	2.5e-09
act	681639	Camptothecin Derivative	TOP1		0.76	2.97e-12	2.83e-09
act	681642	Camptothecin Derivative	TOP1		0.759	3.11e-12	2.84e-09
act	681645	Camptothecin Derivative	TOP1		0.757	4.2e-12	3.69e-09
act	610457	Camptothecin Derivative	TOP1		0.755	4.78e-12	3.85e-09
act	610459	Camptothecin Derivative	TOP1		0.755	4.79e-12	3.85e-09
act	613799	20(S)-Camptothecin-21-lactam	NA	NA	0.755	4.86e-12	3.85e-09
act	620258	9-Succinamido-20(RS)-camptothecin, sodium salt	TOP1		0.754	5.42e-12	4.15e-09
act	603077	9-Acetamido-10-hydroxy-20-(S)-camptothecin	TOP1		0.799	5.96e-12	4.4e-09
act	6396	Thiotepa	A7|AlkAg	FDA approved	0.753	6.11e-12	4.4e-09			LP-184 and LP-100
act	294980	p-N,N-Di(2-chloroethyl)toluidine			0.761	6.46e-12	4.52e-09
act	735037	Camptothecin Derivative	TOP1		0.754	8.63e-12	5.86e-09
act	621686	9-Diethylaminoethoxy-20(RS)-camptothecin hydrochloride	NA	NA	0.748	9.53e-12	6.29e-09
act	85230	Indole-3-propionic acid, 5-[bis(2-chloroethyl)amino]-, m...			0.752	9.99e-12	6.42e-09
act	309455	Benzenamine, N,N-bis(2-chloroethyl)-4-ethoxy-, hydrochlo...			0.76	1.07e-11	6.66e-09
act	105132	Deoxycamptothecin	TOP1		0.747	1.14e-11	6.86e-09
act	610456	Camptothecin Derivative	TOP1		0.746	1.15e-11	6.86e-09
act	94600	CAMPTOTHECIN	TOP1		0.746	1.2e-11	6.96e-09
act	167781	dijodbenzotef			0.746	1.23e-11	6.96e-09
act	48034	Aziridine, 1,1'-[(2,3,5,6-tetramethyl-1,4-phenylene)bis(...			0.742	1.77e-11	9.8e-09
act	610458	Camptothecin Derivative	TOP1		0.74	2.13e-11	1.15e-08
act	681637	Camptothecin Derivative	TOP1		0.744	2.19e-11	1.16e-08
act	3088	Chlorambucil	A7|AlkAg	FDA approved	0.739	2.45e-11	1.26e-08
act	275656	dioxadet			0.746	2.72e-11	1.37e-08
act	629971	Camptothecin Derivative	TOP1		0.735	3.54e-11	1.75e-08
act	652524	antineoplastic-652524	NA	NA	0.733	4.02e-11	1.93e-08
act	681632	Camptothecin Derivative	TOP1		0.733	4.07e-11	1.93e-08
act	132313	Dianhydrogalactitol	A7		0.731	4.79e-11	2.23e-08
act	100880	Camptothecin	TOP1		0.731	4.91e-11	2.24e-08
act	374028	Camptothecin Derivative	TOP1		0.73	5.32e-11	2.39e-08
act	681635	Camptothecin Derivative	TOP1		0.729	5.66e-11	2.49e-08
act	681638	Camptothecin Derivative	TOP1		0.727	7.02e-11	2.99e-08
act	295499	Camptothecin Derivative	TOP1		0.727	7.15e-11	2.99e-08
act	364830	Camptothecin Derivative	TOP1		0.727	7.18e-11	2.99e-08
act	748141	1,1-bis(4-hydroxyphenyl)-2-ferrocenyl-but-1-ene	NA	NA	0.73	8.1e-11	3.32e-08
act	681641	Camptothecin Derivative	TOP1		0.724	8.93e-11	3.6e-08
act	302991	Camptothecin Derivative	TOP1		0.724	9.14e-11	3.62e-08
act	644945	Furo[3',4':6,7]naphtho[2,3-d]-1,3-dioxol-6-one, 5,5a,6,8...			0.773	1.26e-10	4.9e-08
act	652525	antineoplastic-652525	NA	NA	0.723	1.43e-10	5.49e-08
act	111533	Methoxycamptothecin	TOP1		0.723	1.49e-10	5.63e-08
act	759263	Topotecan	TOP1	FDA approved	0.722	1.54e-10	5.73e-08
act	619030	Analog of CC-1065	NA	NA	0.72	1.82e-10	6.67e-08
act	606498	Camptothecin Derivative	TOP1		0.778	1.91e-10	6.89e-08
act	653860	(5S,5As)-5-[3-(dimethylamino)propylamino]-9-(4-hydroxy-3,5-dimethoxyphenyl)-5a,6,8a,9-tetrahydro-5H-[2]benzofuro[6,5-f][1,3]benzodioxol-8-one			0.777	2.23e-10	7.89e-08
act	269721	Androstan-3-one, 17-[[[(2-chloroethyl)nitrosoamino]carbo...			0.721	2.59e-10	9.06e-08
act	132095	Methyl 4-[({4-[bis(2-chloroethyl)amino]phenoxy}carbonyl)amino]benzoate			0.716	3.83e-10	1.32e-07
act	708070	gemmp[10]			0.705	4.69e-10	1.59e-07
act	682297	Quino[2',3':3,4]pyrrolo[1,2-b][2,7]naphthyridine- 3,14-d...	NA	NA	0.704	4.85e-10	1.62e-07
act	690391	(S)-10,11-Methelenedioxycamptothecin lactam	NA	NA	0.702	5.87e-10	1.92e-07
act	80111	4-(Benzyloxy)-n,n-bis(2-chloroethyl)aniline			0.734	5.96e-10	1.92e-07
act	295500	Camptothecin Derivative	TOP1		0.749	5.98e-10	1.92e-07
act	683558	Camptothecin Derivative	TOP1		0.701	6.15e-10	1.95e-07
act	44303	p-Phenylenediamine, N,N-bis(2-chloroethyl)-, hydrochloride			0.721	7.7e-10	2.38e-07
act	780893	(S)-3-chloro-6-(2,3-dihydroxypropyl)-5H-[1,3]dioxolo[4',...	NA	NA	0.712	7.71e-10	2.38e-07
act	343499	CI-921: amsacrine derivative	TOP2		0.735	7.97e-10	2.42e-07
act	613327	Gemcitabine	Ds	FDA approved	0.698	8.05e-10	2.42e-07
act	57199	merophan			0.7	9.35e-10	2.78e-07
act	681634	Camptothecin Derivative	TOP1		0.695	9.89e-10	2.9e-07
act	107124	Camptothecin Derivative	TOP1		0.695	1.02e-09	2.96e-07
act	329680	Hepsulfam	A7		0.694	1.08e-09	3.09e-07
act	644961	MCS-689			0.741	1.18e-09	3.35e-07
act	668281	(-)-.beta.-L-1-[(2-Hydroxymethyl)-1,3-dioxolan-4yl]cytosine	NA	NA	0.697	1.21e-09	3.38e-07
act	737518	Indenoisoquinoline derivative	TOP1		0.696	1.32e-09	3.64e-07
act	709237	Camptothecin Derivative	TOP1		0.691	1.37e-09	3.74e-07
act	104800	Mitozolomide	A7		0.709	1.41e-09	3.8e-07
act	683556	Camptothecin Derivative	TOP1		0.695	1.43e-09	3.81e-07
act	791461	;N-{4-ferrocenyl-5,5-bis-(4-hydroxyphenyl)-pent-4-enyl}s...	NA	NA	0.697	1.67e-09	4.42e-07
act	76937	4-(Anilinomethyl)-N,N-bis(2-chloroethyl)aniline			0.72	1.85e-09	4.83e-07
act	95382	Camptothecin Derivative	TOP1		0.734	1.9e-09	4.92e-07
act	671002	[3-[4-[3-(Fluoromethylsulfonyloxy)propanoyl]piperazin-1-yl]-3-oxopropyl] fluoromethanesulfonate			0.685	2.11e-09	5.4e-07
act	784574		NA	NA	0.698	2.19e-09	5.54e-07
act	651012	Methyl 2-(10-methoxy-14,18-dioxo-17-oxa-3,13-diazapentacyclo[11.8.0.02,11.04,9.015,20]henicosa-1(21),2,4,6,8,10,15(20)-heptaen-19-yl)acetate			0.754	2.23e-09	5.57e-07
act	673596	7-Ethyl-10-hydroxycamptothecin	TOP1	FDA approved	0.683	2.54e-09	6.29e-07
act	688687	7-Chloromethyl-10,11-methylenedioxy-20(S)-camptothecin-2...	NA	NA	0.682	2.67e-09	6.54e-07
act	182986	AZQ	A7		0.68	3.15e-09	7.63e-07
act	701743	1,3-Bis[2-[5-amino-1-(chloromethyl)1,2-dihydrobenzo[e]indole-3-carbonyl]-1h-indol-5-yl]urea			0.684	3.25e-09	7.79e-07
act	673592	7-Ethyl-10,11-methylenedioxy-20(S)-camptothecin	NA	NA	0.684	3.37e-09	8e-07
act	249992	M-AMSA	TOP2		0.679	3.49e-09	8.16e-07
act	603073	12-Amino-20(S)-camptothecin	NA	NA	0.742	3.52e-09	8.16e-07
act	644947	(5S,5As)-5-[4-(dimethylamino)anilino]-9-(4-hydroxy-3,5-dimethoxyphenyl)-5a,6,8a,9-tetrahydro-5H-[2]benzofuro[5,6-f][1,3]benzodioxol-8-one;hydrochloride			0.731	3.57e-09	8.16e-07
act	757098	Melphalan	A7|AlkAg	FDA approved	0.682	1.39e-08	2.63e-06
act	683555	Camptothecin Derivative	TOP1		0.678	3.69e-09	8.35e-07
act	782349	4-(N)-docosahexaenoyl gemcitabine	NA	NA	0.682	3.83e-09	8.6e-07
act	706744	Indenoisoquinoline derivative	TOP1		0.677	3.91e-09	8.68e-07
act	328410	Camptothecin Derivative	TOP1		0.742	5.3e-09	1.17e-06
act	606985	Camptothecin Derivative	TOP1		0.672	5.78e-09	1.26e-06
act	825332	Dxd	NA	NA	0.674	6.65e-09	1.44e-06
act	80103	2,3-butanediol, 1,4-bis(2-methyl-1-aziridinyl)- (8ci)	NA	NA	0.673	6.91e-09	1.48e-06
act	353451	Mitozolomide	A7		0.668	7.47e-09	1.59e-06
act	696881	9-Aminocaptothecin lactam	NA	NA	0.667	8.3e-09	1.75e-06
act	718630	2-[Bis[2-bromoethyl(methyl)amino]phosphoryloxymethyl]-5-methoxy-1-methylindole-4,7-dione			0.666	8.68e-09	1.81e-06
act	249910	Camptothecin Derivative	TOP1		0.665	8.92e-09	1.84e-06
act	731981	5'(2',2'-difluoro-2'-deoxycytidine) 5-nitrofurfuryl N-me...			0.688	9.08e-09	1.86e-06
act	782769	6-(3-(1H-imidazol-1-yl)propyl)-2,3-difluoro-5H-[1,3]diox...	NA	NA	0.673	9.98e-09	2.03e-06
act	296964	triglycidylisocyanurate	NA	NA	0.676	1.1e-08	2.22e-06
act	616348	Irinotecan	TOP1	FDA approved	0.661	1.2e-08	2.39e-06
act	176323	Camptothecin Derivative	TOP1		0.665	1.21e-08	2.41e-06
act	742629	ethylenediaminetetraacetic acid bis-(5-amino salicylic a...			0.67	1.23e-08	2.41e-06
act	296934	Teroxirone	A7		0.66	1.26e-08	2.45e-06
act	619230	20-amino-20-deoxy-20(rs)-camptothecin	NA	NA	0.66	1.27e-08	2.45e-06
act	682298	Camptothecin Derivative	TOP1		0.66	1.33e-08	2.54e-06
act	8806	Melphalan	A7|AlkAg	FDA approved	0.678	3.57e-09	8.16e-07
act	642279	(5S,8Ar,9R)-5-(benzylamino)-9-(4-hydroxy-3,5-dimethoxyphenyl)-5a,6,8a,9-tetrahydro-5H-[2]benzofuro[6,5-f][1,3]benzodioxol-8-one			0.712	1.4e-08	2.63e-06
act	178248	CHLOROZOTOCIN	A7		0.659	1.43e-08	2.68e-06
act	641461	Azane;2-chloroacetate;pentane-1,5-diamine;platinum(4+)			0.706	1.44e-08	2.68e-06
act	736198	Indenoisoquinoline derivative	TOP1		0.667	1.46e-08	2.69e-06
act	700363	Annamycin Liposomal	NA	NA	0.671	1.48e-08	2.7e-06
act	683557	Camptothecin Derivative	TOP1		0.662	1.49e-08	2.71e-06
act	603072	12-Nitro-20(S)-camptothecin	NA	NA	0.721	1.58e-08	2.85e-06
act	736624	Indenoisoquinoline derivative	TOP1		0.661	1.62e-08	2.89e-06
act	74437	epoxypiperazine			0.704	1.65e-08	2.92e-06
act	634724	10,11-methylenedioxycamptothecin	TOP1		0.661	1.66e-08	2.92e-06
act	606986	Camptothecin Derivative	TOP1		0.656	1.71e-08	2.98e-06
act	737318	6-(3-Chloropropyl)-5,6-dihydro-2,3,9-trimethoxy-5,11-dio...			0.66	1.73e-08	2.98e-06
act	645018	1,4-bis(N-Cysteinyldiethylamino)-5,8-dihydroxy anthraquinon			0.656	1.74e-08	2.98e-06
act	649677	N-[3-Methoxy-4-[[7-[[3,4,5-trihydroxy-6-(hydroxymethyl)oxan-2-yl]amino]-10H-indolo[3,2-b]quinolin-11-yl]amino]phenyl]methanesulfonamide			0.656	1.75e-08	2.98e-06
act	672553	antineoplastic-672553	NA	NA	0.656	1.76e-08	2.98e-06
act	644960	MCS-688			0.703	1.84e-08	3.1e-06
act	279836	MITOXANTRONE	TOP2	FDA approved	0.653	2.08e-08	3.47e-06
act	671899	9-Amino-20(S)-glycinyl camptothecin hydrochloride	NA	NA	0.653	2.09e-08	3.47e-06
act	295501	Camptothecin Derivative	TOP1		0.7	2.17e-08	3.58e-06
act	102627	Yoshi 864	A7		0.648	2.85e-08	4.67e-06
act	644966	MCS-694			0.647	3.07e-08	5e-06
act	338947	CLOMESONE	A7		0.651	3.17e-08	5.12e-06
act	54059	1-Aziridinecarboxamide, N,N'-hexamethylenebis(2-methyl-			0.646	3.3e-08	5.3e-06
act	639176	(S)9-Amino-20-O-(N,N-dimethyl)glycinyl camptothecin.HCl			0.657	3.69e-08	5.89e-06
act	606173	Camptothecin Derivative	TOP1		0.691	3.88e-08	6.14e-06
act	706743	5h-[1,3]dioxolo[5,6]indeno[1,2-c]isoquinoline- 5,12(6h)-...			0.643	4.07e-08	6.4e-06
act	606172	Camptothecin Derivative	TOP1		0.642	4.27e-08	6.67e-06
act	782770	(S)-6-(2,3-dihydroxypropyl)-2,3-difluoro-5H-[1,3]dioxolo...	NA	NA	0.655	4.31e-08	6.69e-06
act	134679	Carboqone; Carbazilquinone	A7		0.639	5e-08	7.72e-06
act	754385	1-[bis(4,4'-aminophenyl)methylidenyl]-[3]ferrocenophane	NA	NA	0.652	5.08e-08	7.79e-06
act	240529	2,5-Cyclohexadien-1-one, 4-[[4-[bis(2-chloroethyl)amino]...			0.643	5.15e-08	7.84e-06
act	29459	Quinoline, 4-[.alpha.-[bis(2-chloroethyl)amino]-4-methox...			0.657	5.21e-08	7.89e-06
act	658088	[3-[1,2-Bis(propan-2-ylcarbamoyloxymethyl)-6,7-dihydro-5H-pyrrolizin-3-yl]pyridin-1-ium-1-yl]methyl 2-methylpropanoate;iodide			0.638	5.58e-08	8.39e-06
act	645017	1,4-bis[(2-Aminoethyl)amino]-5,8-dihydroxyanthraquinone			0.635	6.6e-08	9.87e-06
act	628663	Benzoic acid, 4-[[5,5a,6,8,8a,9-hexahydro-9-(4-hydroxy-3...			0.643	6.82e-08	1.01e-05
act	740475	2-Amino-5-[[3-[2-[[5-(4-amino-2-oxopyrimidin-1-yl)-4,4-difluoro-3-hydroxyoxolan-2-yl]methoxy-[4-chlorobutyl(methyl)amino]phosphoryl]oxyethylsulfonyl]-1-[[carboxy(phenyl)methyl]amino]-1-oxopropan-2-yl]			0.639	6.85e-08	1.01e-05
act	672552	antineoplastic-672552	NA	NA	0.634	7.08e-08	1.04e-05
act	766347		NA	NA	0.656	7.19e-08	1.05e-05
act	728073	Irinotecan	TOP1	FDA approved	0.655	7.63e-08	1.11e-05
act	269719	Estr-4-en-3-one, 17-[[[(2-chloroethyl)nitrosoamino]carbo...	NA	NA	0.64	8.3e-08	1.2e-05
act	243929	1-Propanesulfonamide, N-[4-(9-acridinylamino)-3-methoxyp...			0.631	8.49e-08	1.22e-05
act	369395	10-aminocamptothecin	TOP1		0.63	8.82e-08	1.25e-05
act	301739	Mitoxantrone	TOP2	FDA approved	0.629	9.29e-08	1.31e-05
act	712583	(S,S)-(+)-Bis(2-chloropropyl)sulfide			0.647	9.49e-08	1.33e-05
act	793724	;Gimatecan	NA	NA	0.633	9.57e-08	1.34e-05
act	376254	Indeno[1,2-c]isoquinoline-5,11-dione, 6-methyl- 5-(methy...	NA	NA	0.629	9.8e-08	1.36e-05
act	154318	Methanesulfon-m-anisidide, 4'-[(3-chloro-5-methoxy-9-acr...			0.633	9.85e-08	1.36e-05
act	671901	7-Chloromethyl-10,11-methylenedioxy-20(S)-camptothecin	NA	NA	0.628	1.01e-07	1.38e-05
act	128887	Benzenebutanamide, N-(phenylmethyl)-4-bis(2-chloro- ethy...			0.637	1.02e-07	1.4e-05
act	154948	M-AMSA	TOP2		0.641	1.03e-07	1.4e-05
act	642324	5-[(5S,8Ar)-5-(4-fluoroanilino)-8-oxo-5a,6,8a,9-tetrahydro-5H-[2]benzofuro[6,5-f][1,3]benzodioxol-9-yl]-3-methoxycyclohexa-3,5-diene-1,2-dione			0.68	1.04e-07	1.4e-05
act	736201	Indenoisoquinoline derivative	TOP1		0.636	1.05e-07	1.41e-05
act	303812	Aphidicoline glycinate	Ds		0.627	1.08e-07	1.44e-05
act	759857	Clofarabine	Ds	FDA approved	0.63	1.15e-07	1.52e-05
act	736493	Indenoisoquinoline derivative	TOP1		0.63	1.19e-07	1.57e-05
act	736200	6-(3-Bromopropyl)-5,6-dihydro3-nitro-5,11-dioxo-9-thiome...			0.634	1.2e-07	1.57e-05
act	780892	6-(3-(1H-imidazol-1-yl)propyl)-3-chloro-5H-[1,3]dioxolo[...	NA	NA	0.638	1.26e-07	1.64e-05
act	628672	antineoplastic-d613939	NA	NA	0.636	1.38e-07	1.79e-05
act	784575		NA	NA	0.636	1.42e-07	1.82e-05
act	704533	[3-[[5-(4-Amino-2-oxopyrimidin-1-yl)oxolan-2-yl]methoxy-hydroxyphosphoryl]oxy-2-hydroxypropyl] [5-(5-fluoro-2,4-dioxopyrimidin-1-yl)-3-hydroxyoxolan-2-yl]methyl hydrogen phosphate			0.627	1.42e-07	1.82e-05
act	724998	LMP-400	TOP1	Clinical trial	0.626	1.49e-07	1.9e-05
act	159862	Ethanesulfon-m-anisidide, 4'-(4,5-dimethyl-9-acridinyl)-...			0.63	1.5e-07	1.9e-05
act	119875	Cisplatin	A7|AlkAg	FDA approved	0.62	1.63e-07	2.05e-05
act	63878	Cytarabine	Ds	FDA approved	0.619	1.75e-07	2.2e-05
act	634047	Di(cis-diammine)bis(.alpha.,.alpha.'-diethyl-4,4'-stilbe...			0.682	1.8e-07	2.25e-05
act	658086	Pyridinium, 1-[(1-oxooctyloxy)methyl]-3-[6,7-dihydro- 1,...			0.618	1.83e-07	2.28e-05
act	728091	6-[(3-Hydroxy)-1-propyl]-5,6-dihydro-2,3-dimethoxy-8,9-m...			0.627	2.28e-07	2.82e-05
act	670656	4a,14a-Epoxy-4,14-[3]hexene[1,5]diynonaphtho[2,3-c] phen...			0.614	2.32e-07	2.85e-05
act	25154	Pipobroman	A7|AlkAg	FDA approved	0.614	2.37e-07	2.9e-05
act	740268	Indenoisoquinoline derivative	TOP1		0.621	2.5e-07	3.05e-05
act	673591	9-Chloro-10,11-methylenedioxy-20(S)-camptothecin			0.617	2.55e-07	3.09e-05
act	642322	5-[(5S,8Ar)-5-(4-nitroanilino)-8-oxo-5a,6,8a,9-tetrahydro-5H-[2]benzofuro[6,5-f][1,3]benzodioxol-9-yl]-3-methoxycyclohexa-3,5-diene-1,2-dione			0.659	2.56e-07	3.09e-05
act	355457	11H-Indeno[1,2-c]isoquinolinium, 9-hydroxy-2,3,8-trimeth...	NA	NA	0.611	2.69e-07	3.23e-05
act	90904	Nicotinic acid, [p-[bis(2-chloroethyl)amino]benzylidene]...			0.628	2.9e-07	3.46e-05
act	643833	Camptothecin Derivative	TOP1		0.609	3.03e-07	3.6e-05
act	787304	;3-chloro-6-(3-((4,5-dihydrothiazol-2-yl)amino)propyl)-9...	NA	NA	0.627	3.07e-07	3.63e-05
act	701747	N-[5-[(Z)-3-[5-Amino-1-(chloromethyl)-1,2-dihydrobenzo[e]indol-3-yl]-3-oxoprop-1-enyl]-1-methylpyrazol-3-yl]acetamide			0.617	3.11e-07	3.66e-05
act	699490	Doxoform			0.612	3.38e-07	3.95e-05
act	628676	Furo[3',4':6,7]naphtho[2,3-d]-1,3-dioxol-6(5aH)-one, 9-[...			0.616	3.43e-07	4e-05
act	629	Bioxiran			0.67	3.53e-07	4.09e-05
act	740645	Indenoisoquinoline derivative	TOP1		0.609	3.84e-07	4.43e-05
act	708446	[5-(4-Amino-2-oxopyrimidin-1-yl)-3,4-dihydroxyoxolan-2-yl]methyl [5-(5-fluoro-2,4-dioxopyrimidin-1-yl)-3-hydroxyoxolan-2-yl]methyl hydrogen phosphate			0.609	3.86e-07	4.43e-05
act	615291	bizelesin			0.604	4.04e-07	4.62e-05
act	782074	2-(2-hydroxy-3-methoxy-13-oxo-[1,3]dioxolo[4',5':4,5]ben...	NA	NA	0.608	4.13e-07	4.69e-05
act	114575	Mitoclomine			0.636	4.14e-07	4.69e-05
act	697912	5-Fluoro deoxy uridine 10mer	Ds|AM	Clinical trial	0.607	4.34e-07	4.88e-05
act	728319	6-(3-Homopiperazinyl1-1-propyl)-5,6-dihydro-2,3-dimethox...			0.611	4.44e-07	4.98e-05
act	658093	[3-[1,2-Bis(propan-2-ylcarbamoyloxymethyl)-6,7-dihydro-5H-pyrrolizin-3-yl]pyridin-1-ium-1-yl]methyl cyclopropanecarboxylate;iodide			0.602	4.49e-07	5.01e-05
act	642328	benzonitrile, 4-[[1,3,3a,4,9,9a-hexahydro-9-(4-hydroxy- ...	NA	NA	0.606	4.61e-07	5.12e-05
act	141549	M-AMSA	TOP2		0.606	4.65e-07	5.14e-05
act	711618	(3E)-3-[(2-Chloro-5-methoxy-6-methyl-1H-indol-3-yl)methylidene]-5-methoxy-6-methyl-1H-indol-2-one			0.61	4.7e-07	5.17e-05
act	141540	Etoposide	TOP2	FDA approved	0.601	4.74e-07	5.18e-05
act	642278	N-[(5S,8Ar,9R)-9-(4-hydroxy-3,5-dimethoxyphenyl)-8-oxo-5a,6,8a,9-tetrahydro-5H-[2]benzofuro[5,6-f][1,3]benzodioxol-5-yl]-3-nitrobenzamide			0.659	4.76e-07	5.18e-05
act	688021	Phosphorodiamidic acid, N,N-bis(2-bromoethyl)-, (5-nitro...			0.605	4.91e-07	5.33e-05
act	658106	[4-[1,2-Bis(propan-2-ylcarbamoyloxymethyl)-6,7-dihydro-5H-pyrrolizin-3-yl]pyridin-1-ium-1-yl]methyl pentanoate;iodide			0.605	4.98e-07	5.38e-05
act	628679	Furo[3',4':6,7]naphtho[2,3-d]-1,3-dioxol-6(5H)-one, 9-[(...	NA	NA	0.603	5.34e-07	5.74e-05
act	644946	furo[3',4':6,7]naphtho[2,3-d]-1,3-dioxol-6(5ah)-one, 9-(...			0.65	5.78e-07	6.19e-05
act	240386	Spiro(imidazolidine-4,1'-(1H)indene)-2,5-dione, 6'-[bis(...			0.665	6.11e-07	6.51e-05
act	76356	9.beta.-D-Arabinofuranosyl-2-chloroadenine	NA	NA	0.6	6.35e-07	6.74e-05
act	688484		NA	NA	0.6	6.5e-07	6.86e-05
act	76518	1-(4-Bromophenyl)-3-carbamoylurea			0.622	6.58e-07	6.92e-05
act	82587	L-Tyrosine, [[4-[bis(2-chloroethyl)amino]phenyl]methylen...			0.604	6.63e-07	6.94e-05
act	268965	Benzaldehyde, 4-[bis[2-[(methylsulfonyl)oxy]ethyl]amino]-	NA	NA	0.595	6.75e-07	7.03e-05
act	26980	Mitomycin	A2	FDA approved	0.595	6.78e-07	7.04e-05
act	659948	7-O-(2,3,6-Trideoxy-2-fluoro-.alpha.-L-talo-hexopyranosy...			0.594	7.01e-07	7.22e-05
act	758450	mitoxantrone hydrochloride (usan)			0.598	7.02e-07	7.22e-05
act	348948	CYCLODISONE	A7		0.594	7.24e-07	7.42e-05
act	758423	M-AMSA	TOP2		0.597	7.65e-07	7.8e-05
act	140701	4'-(9-acridinylamino)sulfanilanilide, monohydrochloride	NA	NA	0.591	8.13e-07	8.26e-05
act	683414	N-[4-[[(5S,5As,8aR,9R)-9-(4-hydroxy-3,5-dimethoxyphenyl)-8-oxo-5a,6,8a,9-tetrahydro-5H-[2]benzofuro[5,6-f][1,3]benzodioxol-5-yl]amino]phenyl]-1-methyl-4-nitropyrrole-2-carboxamide			0.591	8.45e-07	8.55e-05
act	237538	2,4-Thiazolidinedione, 5-(3-phenyl-2-propenylidene)-			0.595	8.58e-07	8.64e-05
act	781521	3-chloro-6-(3-((2-hydroxyethyl)amino)propyl)-5H-[1,3]dio...	NA	NA	0.601	9.72e-07	9.75e-05
act	249911	1H-Pyrano[3',4':6,7]indolizino[1,2-b]quinolin-14(12H)-on...			0.634	9.93e-07	9.9e-05
act	156303	M-AMSA	TOP2		0.592	9.96e-07	9.9e-05
act	33765	CAP 1 hydrochloride			0.605	1.01e-06	9.97e-05
act	642915	Neuro_000320			0.6	1.01e-06	9.97e-05
act	150440	methanesulfonamide, n-[3-methoxy-4-[(4-methyl-9-acridiny...			0.596	1.01e-06	9.97e-05
act	781519	3-fluoro-6-((2S,3R,4R)-2,3,4,5-tetrahydroxypentyl)-5H-[1...	NA	NA	0.599	1.06e-06	0.000104
act	673593	7-Ethyl-9-amino-10,11-methylenedioxy-20(S)-camptothecin	NA	NA	0.586	1.06e-06	0.000104
act	740520	6-(3-bromopropyl)-9-fluoro-5,6-dihydro-2,3-dimethoxy-5,1...			0.594	1.09e-06	0.000105
act	243928	Ethanesulfonamide, N-[4-(9-acridinylamino)-3-methoxyphen...			0.654	1.1e-06	0.000106
act	357704	Cyanomorpholinodoxorubicin	Db		0.585	1.11e-06	0.000107
act	602949		NA	NA	0.672	1.13e-06	0.000108
act	645737	(5S,8Ar)-5-[2-(dimethylamino)ethoxy]-9-(4-hydroxy-3,5-dimethoxyphenyl)-5a,6,8a,9-tetrahydro-5H-[2]benzofuro[5,6-f][1,3]benzodioxol-8-one			0.636	1.18e-06	0.000113
act	713661	(5Z)-1-(1,3-Benzothiazol-2-yl)-3-chloro-8-(3-chlorophenyl)-6-methyl-5-[(E)-3-phenylprop-2-enylidene]-1,7,8-triazaspiro[3.4]oct-6-en-2-one			0.62	1.2e-06	0.000114
act	756998	1-[(4-aminophenyl)-(4-hydroxyphenyl)methylidene]-[3]ferr...	NA	NA	0.597	1.21e-06	0.000115
act	628678	antineoplastic-d613939			0.587	1.27e-06	0.000119
act	760764	Voreloxin	TOP2	Clinical trial	0.587	1.27e-06	0.00012
act	668523	N,N-bis(2-chloropropyl)-N-methylammonium chloride	NA	NA	0.586	1.32e-06	0.000123
act	642277	N-[(5S,8Ar,9R)-9-(4-hydroxy-3,5-dimethoxyphenyl)-8-oxo-5a,6,8a,9-tetrahydro-5H-[2]benzofuro[5,6-f][1,3]benzodioxol-5-yl]-3-aminobenzamide			0.634	1.33e-06	0.000124
act	741459	(11as)-8-(3-[(11as)-2,2-difluoro-7-methoxy-5-oxo-2,3,5,1...			0.586	1.33e-06	0.000124
act	663249	Triapine	Dr|CC	Clinical trial	0.582	1.36e-06	0.000125
act	269148	MENOGARIL	TOP2		0.581	1.42e-06	0.000131
act	95466	PCNU	A7		0.58	1.51e-06	0.000139
act	75520	tfdu	TYMS	FDA approved	0.583	1.54e-06	0.000141
act	765396	BMN-673	PARP1	FDA approved	0.587	1.56e-06	0.000142
act	750285	dp1	NA	NA	0.583	1.57e-06	0.000143
act	674182		NA	NA	0.578	1.61e-06	0.000145
act	348894	Benzenesulfonamide, 4-[(9-acridinylmethyl)amino]-N-(amin...			0.582	1.65e-06	0.000149
act	334352	9H-Thioxanthen-9-one, 1-[[2-(dimethylamino)ethyl]amino]-...			0.586	1.68e-06	0.00015
act	765775	Gemcitabine elaidate	Ds	Clinical trial	0.585	1.74e-06	0.000155
act	717120	Ethyl 4-[bis(2-methylsulfonyloxyethyl)amino]-2-methylbenzoate			0.581	1.75e-06	0.000156
act	607347	Benzene, 1-[[2-chloro-1-(chloromethyl)ethyl]thio]-4-fluoro-			0.576	1.83e-06	0.000162
act	143102	methanesulfonamide, n-[4-[(3-chloro-9-acridinyl)amino]ph...			0.584	1.85e-06	0.000163
act	670655	4a,14a-Epoxy-4,14-[3]hexene[1,5]diynonaphtho[2,3-c] phen...			0.575	1.9e-06	0.000167
act	280074	Ethanol, 2,2'-[[4-[[[4-[2-(phenoxymethyl)-4-thiazolyl]ph...			0.574	2.03e-06	0.000178
act	19781	Phenol, 4,4'-(1,6-hexanediyl)bis-			0.578	2.04e-06	0.000179
act	729813	6-(3-Aminopropyl)-5,6-dihydro-8,9-methylenedioxy-5,11-di...			0.581	2.2e-06	0.000191
act	734288	6-(3-Azidopropyl)-5,6-dihydro-7,8-dimethoxy-3-nitro-5,11...			0.589	2.29e-06	0.000199
act	95678	3-HP	Ds		0.569	2.55e-06	0.00022
act	355644	Anthrapyrazole derivative	TOP2		0.569	2.58e-06	0.000222
act	245341	1,3-benzenediol, 5-[bis(2-chloroethyl)amino]-, dicarbama...			0.576	2.71e-06	0.000233
act	642329	Naphtho[2,3-c]furan-1(9a)-one, 3,3a,4,9-tetrahydro-4- (4...			0.619	2.75e-06	0.000235
act	781520	3-chloro-6-((2S,3R,4R)-2,3,4,5-tetrahydroxypentyl)-5H-[1...	NA	NA	0.58	2.79e-06	0.000238
act	407335	Neuro_000222			0.566	2.91e-06	0.000247
act	642323	Ethyl 4-[[(5S,8aR)-9-(5-methoxy-3,4-dioxocyclohexa-1,5-dien-1-yl)-8-oxo-5a,6,8a,9-tetrahydro-5H-[2]benzofuro[5,6-f][1,3]benzodioxol-5-yl]amino]benzoate			0.612	2.98e-06	0.000252
act	99445	cytosine arabinoside monophosphate	NA	NA	0.566	3.02e-06	0.000254
act	755880	Mitomycin	A2	FDA approved	0.57	3.06e-06	0.000256
act	721387	5-Fluoro-2'-deoxyuridyl 2-(5-methoxy-N-methylindoloquino...			0.57	3.06e-06	0.000256
act	734294	Indenoisoquinoline derivative	TOP1		0.573	3.26e-06	0.000272
act	674347	4-(1,1-Dimethylethyl)-1-(1-methylethyl)-{9,10-dihydro-12...			0.563	3.45e-06	0.000287
act	728089	6-[3-(Aminobutylamino)-1-propyl]-5,6-dihydro-2,3-dimetho...			0.575	3.52e-06	0.000291
act	300288	1H-Benz[de]isoquinoline-1,3(2H)-dione, 2-[2-(dimethylami...			0.566	3.57e-06	0.000294
act	651850	(5S,8Ar)-9-(4-hydroxy-3,5-dimethoxyphenyl)-5-(2-piperidin-1-ylethylamino)-5a,6,8a,9-tetrahydro-5H-[2]benzofuro[6,5-f][1,3]benzodioxol-8-one			0.624	3.65e-06	0.0003
act	125066	Bleomycin	Db	FDA approved	0.561	3.78e-06	0.00031
act	784577		NA	NA	0.573	3.93e-06	0.000321
act	149501	Bleomycin A5, sulfate	NA	NA	0.568	3.99e-06	0.000325
act	673595	7-Ethyl-9-amino-20(S)-camptothecin	NA	NA	0.559	4.18e-06	0.000339
act	669727	[5-(5-Fluoro-2,4-dioxopyrimidin-1-yl)-2-(hydroxymethyl)oxolan-3-yl] (2E,4E,6E,8E)-3,7-dimethyl-9-(2,6,6-trimethylcyclohexen-1-yl)nona-2,4,6,8-tetraenoate			0.562	4.43e-06	0.000358
act	658104	[4-[1,2-Bis(propan-2-ylcarbamoyloxymethyl)-6,7-dihydro-5H-pyrrolizin-3-yl]pyridin-1-ium-1-yl]methyl heptanoate;iodide			0.558	4.45e-06	0.000359
act	56410	PORFIROMYCIN	A7		0.557	4.52e-06	0.000363
act	767125	BMN-673	PARP1	FDA approved	0.565	4.61e-06	0.000369
act	122819	Teniposide	TOP2	FDA approved	0.556	4.77e-06	0.00038
act	659687	6H-Pyrido[4,3-b]carbazole-1-carboxamide, 9-hydroxy- 5,6-...	NA	NA	0.56	4.86e-06	0.000385
act	55720	Phosphinic acid, bis(1-aziridinyl)-, 2-naphthyl ester	NA	NA	0.623	4.87e-06	0.000385
act	628665	4-[[(5S,8Ar)-9-(4-hydroxy-3,5-dimethoxyphenyl)-8-oxo-5a,6,8a,9-tetrahydro-5H-[2]benzofuro[5,6-f][1,3]benzodioxol-5-yl]amino]benzonitrile			0.556	4.87e-06	0.000385
act	642282	(5S,8Ar,9R)-5-[(3-fluorophenyl)methylamino]-9-(4-hydroxy-3,5-dimethoxyphenyl)-5a,6,8a,9-tetrahydro-5H-[2]benzofuro[6,5-f][1,3]benzodioxol-8-one			0.606	4.91e-06	0.000386
act	246131	Valrubicin	TOP2	FDA approved	0.562	5.46e-06	0.000429
act	701973	4-N-Diphenoxyphosphoryl-1-N-(10H-indolo[3,2-b]quinolin-11-yl)-2-methoxybenzene-1,4-diamine			0.561	5.61e-06	0.000438
act	729812	6-(3-Chloropropyl)-5,6-dihydro-8,9-methylenedioxy-5,11-d...			0.569	5.7e-06	0.000444
act	783076		NA	NA	0.556	5.83e-06	0.000453
act	783604	Azonafides	NA	NA	0.556	5.92e-06	0.000458
act	721386	5-Fluoro-2'-deoxyuridyl 2-(1,4-naphthoquinonyl)methyl N-...			0.555	6.02e-06	0.000465
act	641457	Azane;hexane-1,6-diamine;platinum(4+);propanedioate			0.612	6.07e-06	0.000467
act	646714	2,5-Dimethyl-3,6-diaziridinyl-1,4-benzoquinone			0.551	6.2e-06	0.000475
act	69945	phosphoramide mustard cyclohexylamine salt			0.551	6.23e-06	0.000475
act	686363	Purino[7,8-a]quinazoline-5,9,11-trione, 6,8,10-trimethyl-			0.551	6.23e-06	0.000475
act	298276	Ethanediamide, N,N'-bis[[1-(1,1-dimethylethyl)-2-aziridi...			0.55	6.3e-06	0.000478
act	641548	Betuletol			0.549	6.64e-06	0.000502
act	727729	1, 1'[Pentane-1,5-diyl)dioxy]bis(11as)-2-fluoro-7-methox...			0.557	6.66e-06	0.000502
act	778776		NA	NA	0.557	6.81e-06	0.000512
act	672974		NA	NA	0.549	6.83e-06	0.000512
act	314622	Indenoisoquinoline derivative	TOP1		0.549	6.86e-06	0.000513
act	789552	;3-chloro-6-(3-(isopropylamino)propyl)-9-methoxy-5H-pyri...	NA	NA	0.557	6.9e-06	0.000514
act	757804	Etoposide	TOP2	FDA approved	0.551	7.37e-06	0.000546
act	72151	coumarin, 6-[[p-[bis(hydroxyethyl)amino]benzylidene]amin...			0.547	7.37e-06	0.000546
act	632794	Ammonia; 2,5-dimethylhexane-2,5-diamine; platinum(2+)			0.619	7.45e-06	0.00055
act	287459	Cytarabine	Ds	FDA approved	0.551	7.57e-06	0.000557
act	663790	[5-(5-Fluoro-2,4-dioxopyrimidin-1-yl)-2-(hydroxymethyl)oxolan-3-yl] butanoate			0.55	7.62e-06	0.000558
act	758230	Floxuridine	Ds|TYMS	FDA approved	0.55	7.63e-06	0.000558
act	680417	[3,4-Dihydroxy-5-[4-[[(Z)-octadec-9-enyl]amino]-2-oxopyrimidin-1-yl]oxolan-2-yl]methyl [5-(5-fluoro-2,4-dioxopyrimidin-1-yl)-2-(hydroxymethyl)oxolan-3-yl] hydrogen phosphate			0.546	7.84e-06	0.000572
act	736680	6-(3-Aminopropyl)-5,6-dihydro-3-nitro-5,11-dioxo-9-thiom...			0.55	7.9e-06	0.000574
act	778770		NA	NA	0.558	8e-06	0.00058
act	645253	7-Hydroxy-1-(4-methoxybenzyl)-2-methylisoquinolin-6(2H)-one			0.595	8.03e-06	0.00058
act	697685		NA	NA	0.545	8.13e-06	0.000586
act	683140		NA	NA	0.545	8.25e-06	0.000592
act	360702	1-Piperazinecarboxylic acid, 4-formyl-, 2-[2,5-bis(1-azi...			0.553	8.32e-06	0.000595
act	658082	Pyridinium, 1-[(1-oxobutoxy)methyl]-3-[6,7-dihydro- 1,2-...			0.544	8.35e-06	0.000596
act	638856		NA	NA	0.589	8.38e-06	0.000596
act	266748	Hydrazinecarbothioamide, 2-[[3-(methylamino)-2-pyridinyl...			0.544	8.49e-06	0.000602
act	688022	Phosphorodiamidic acid, N,N-bis(2-bromoethyl)-, (5-nitro...			0.552	8.72e-06	0.000617
act	790510	;6-(3-(1H-imidazol-1-yl)propyl)-3-fluoro-9-methoxy-5H-py...	NA	NA	0.555	8.95e-06	0.000631
act	207895	wln: t56 bnonj bo fnw i- at6n dntj d1	NA	NA	0.546	9.22e-06	0.000648
act	758612	Bleomycin	Db	FDA approved	0.546	9.3e-06	0.000652
act	166224	Ethanol, 2,2'-[[4-[[(3-chlorophenyl)imino]methyl]phenyl]...			0.545	9.61e-06	0.000672
act	758667	Teniposide	TOP2	FDA approved	0.545	9.69e-06	0.000675
act	357885	biantrazole	NA	NA	0.541	9.82e-06	0.000682
act	27640	Floxuridine	Ds|TYMS	FDA approved	0.541	9.86e-06	0.000683
act	642913	[5-[[2-Chloroethyl(nitroso)carbamoyl]amino]-3-hydroxy-2-(hydroxymethyl)-6-methoxyoxan-4-yl] tetradecanoate			0.63	9.97e-06	0.000689
act	642281	(5R,8As,9S)-5-[(4-fluorophenyl)methylamino]-9-(4-hydroxy-3,5-dimethoxyphenyl)-5a,6,8a,9-tetrahydro-5H-[2]benzofuro[6,5-f][1,3]benzodioxol-8-one			0.607	1e-05	0.000689
act	627749		NA	NA	0.595	1.03e-05	0.000711
act	76919	2-Pyridinecarboxylic acid, 5-amino-6-(7-amino-1,2,3,4,5,...			0.556	1.05e-05	0.000722
act	239336	bhac	NA	NA	0.584	1.07e-05	0.000729
act	266743	Hydrazinecarbothioamide, 2-[(5-amino-2-pyridinyl)methyle...			0.539	1.07e-05	0.00073
act	625738		NA	NA	0.599	1.08e-05	0.00073
act	32065	Hydroxyurea	AM|Dr	FDA approved	0.538	1.11e-05	0.000749
act	782954	N-[2-(morpholin-4-yl)ethyl]-L-olivosyl-AF (1N)	NA	NA	0.541	1.15e-05	0.000774
act	724994	2-[(Dimethylamino)-1-ethyl]-5,6-dihydro-2,3-dimethoxy-8,...			0.541	1.15e-05	0.000774
act	644967	2-Acetamido-N-benzyl-6-[benzyl-[2-chloroethyl(nitroso)carbamoyl]amino]hexanamide			0.537	1.16e-05	0.000776
act	105014	Cladribine	Ds|ADA	FDA approved	0.54	1.24e-05	0.000831
act	658087	[3-[1,2-Bis(propan-2-ylcarbamoyloxymethyl)-6,7-dihydro-5H-pyrrolizin-3-yl]pyridin-1-ium-1-yl]methyl 2-ethylbutanoate;iodide			0.535	1.26e-05	0.000842
act	675576	6-(3-(Diethylamino)propyl)-8,10-dimethylpurino[7,8-a]quinazoline-5,9,11(6H,8H,10H)-trione			0.538	1.34e-05	0.000893
act	740524	6-(3-azidopropyl)-9-fluoro-5,6-dihydro-2,3-dimethoxy-5,1...			0.541	1.38e-05	0.000917
act	650931	2'-bromo-4'-epi-daunorubicin	NA	NA	0.541	1.41e-05	0.000935
act	628669	(5S,8Ar)-5-(3-acetylanilino)-9-(4-hydroxy-3,5-dimethoxyphenyl)-5a,6,8a,9-tetrahydro-5H-[2]benzofuro[5,6-f][1,3]benzodioxol-8-one			0.591	1.52e-05	0.001
act	728979	6-(3-Azidopropyl)-5,6-dihydro-8,9-methylenedioxy-3-nitro...			0.551	1.57e-05	0.00103
act	651851	(5S,8Ar)-9-(4-hydroxy-3,5-dimethoxyphenyl)-5-(2-piperidin-1-ylethylamino)-5a,6,8a,9-tetrahydro-5H-[2]benzofuro[6,5-f][1,3]benzodioxol-8-one;hydrochloride			0.585	1.58e-05	0.00103
act	705437	[(1S,2R)-1-Benzamido-3-[[(1S,2S,3R,4S,7R,9S,10S,12R,15S)-4,12-diacetyloxy-2-benzoyloxy-1,9-dihydroxy-10,14,17,17-tetramethyl-11-oxo-6-oxatetracyclo[11.3.1.03,10.04,7]heptadec-13-en-15-yl]oxy]-3-oxo-1-			0.534	1.58e-05	0.00103
act	150862	Bleomycin fraction BLM-HPE	NA	NA	0.529	1.62e-05	0.00106
act	736202	Indenoisoquinoline derivative	TOP1		0.541	1.66e-05	0.00108
act	768112	SAR-402674	TOP1	Clinical trial	0.541	1.67e-05	0.00109
act	156302	methanesulfonamide, n-[3-methoxy-4-[(4-methyl-9-acridiny...			0.537	1.68e-05	0.00109
act	312887	Fludarabine	Ds|AM|Dr|STAT1	FDA approved	0.528	1.74e-05	0.00112
act	642289	N-[(5S,8Ar,9R)-9-(4-hydroxy-3,5-dimethoxyphenyl)-8-oxo-5a,6,8a,9-tetrahydro-5H-[2]benzofuro[5,6-f][1,3]benzodioxol-5-yl]-3-fluorobenzamide			0.577	1.77e-05	0.00114
act	725775	6-[(3-Thiazolylamino)-1-propyl]-5,6-dihydro-2,3-dimethox...			0.531	1.77e-05	0.00114
act	352752	1H-Pyrrolizine-6,7-dimethanol, 5-(3,4-dichlorophenyl)-2,...	NA	NA	0.531	1.77e-05	0.00114
act	789553	;3-chloro-9-methoxy-6-(3-(methylamino)propyl)-5H-pyrido[...	NA	NA	0.535	1.79e-05	0.00114
act	642280	(5R,8As,9S)-9-(4-hydroxy-3,5-dimethoxyphenyl)-5-[(4-nitrophenyl)methylamino]-5a,6,8a,9-tetrahydro-5H-[2]benzofuro[6,5-f][1,3]benzodioxol-8-one			0.576	1.81e-05	0.00115
act	62709	ipas			0.535	1.83e-05	0.00116
act	124463	Fludarabine	Ds|AM|Dr|STAT1	FDA approved	0.526	1.88e-05	0.00119
act	740975	6-(3-chloropropyl)-9-cyano-5,6-dihydro-3-nitro-5,11-diox...			0.538	1.93e-05	0.00122
act	740644	6-(3-bromopropyl)-9-ethoxy-5,6-dihydro-3-nitro-5,11-diox...			0.533	1.93e-05	0.00122
act	616232	Dibromodulcitol	NA	NA	0.584	2.02e-05	0.00127
act	735036	6-[3-(2-Hydroxyethyl)-methylamino-1-propyl]-5,6-dihydro-...			0.535	2.13e-05	0.00133
act	721514	2-(N,N-bis(2-chloroethyl)phosphorodiamidoxy)methyl-1-met...			0.523	2.13e-05	0.00133
act	673347	Naphthalene, 1,4-bis(oxiranylmethoxy)-			0.526	2.21e-05	0.00138
act	642284	4-[[[(5S,8Ar,9R)-9-(4-hydroxy-3,5-dimethoxyphenyl)-8-oxo-5a,6,8a,9-tetrahydro-5H-[2]benzofuro[6,5-f][1,3]benzodioxol-5-yl]amino]methyl]benzonitrile			0.571	2.24e-05	0.00139
act	663792	[3-Butanoyloxy-5-(5-fluoro-2,4-dioxopyrimidin-1-yl)oxolan-2-yl]methyl butanoate			0.526	2.27e-05	0.00141
act	658107	[4-[1,2-Bis(propan-2-ylcarbamoyloxymethyl)-6,7-dihydro-5H-pyrrolizin-3-yl]pyridin-1-ium-1-yl]methyl butanoate;iodide			0.522	2.28e-05	0.00141
act	638855	[5-[[2-Chloroethyl(nitroso)carbamoyl]amino]-3,4-dihydroxy-6-methoxyoxan-2-yl]methyl hexadecanoate			0.525	2.33e-05	0.00144
act	648114	antineoplastic-d648114			0.528	2.4e-05	0.00148
act	216135	Fotretamine			0.564	2.47e-05	0.00152
act	128579	Methanesulfonamide, N-[4-[(3-amino-9-acridinyl)amino]phe...			0.527	2.49e-05	0.00152
act	793679	CNDAC		Clinical trial	0.523	2.49e-05	0.00152
act	628667	(5S,8Ar)-9-(4-hydroxy-3,5-dimethoxyphenyl)-5-(3-methoxyanilino)-5a,6,8a,9-tetrahydro-5H-[2]benzofuro[5,6-f][1,3]benzodioxol-8-one			0.578	2.55e-05	0.00155
act	356244	Carbamic acid, (1-methylethyl)-, [5-(4-chlorophenyl)-2,3...			0.523	2.55e-05	0.00155
act	241240	Carboplatin	A7|AlkAg	FDA approved	0.519	2.57e-05	0.00156
act	143147	urea, 1,1'-(methylenedi-4,1-cyclohexylene)bis[3-(2-chlor...			0.553	2.61e-05	0.00157
act	787303	;6-(3-(1H-imidazol-1-yl)propyl)-3-chloro-9-methoxy-5H-py...	NA	NA	0.53	2.61e-05	0.00157
act	620480	3-Aza-A-homoandrost-4a-en-4-one, 17-[[[4-[bis(2-chloroet...	NA	NA	0.522	2.61e-05	0.00157
act	281818	Ethanol, 2,2'-[[3-methyl-4-[[[4-[2-(4-propoxyphenyl]-4-t...			0.522	2.62e-05	0.00158
act	628662	(5S,8Ar)-5-(1,3-benzodioxol-5-ylamino)-9-(4-hydroxy-3,5-dimethoxyphenyl)-5a,6,8a,9-tetrahydro-5H-[2]benzofuro[5,6-f][1,3]benzodioxol-8-one			0.583	2.64e-05	0.00158
act	653864	Ethyl 4-[[(5S,5aS)-9-(4-hydroxy-3,5-dimethoxyphenyl)-8-oxo-5a,6,8a,9-tetrahydro-5H-[2]benzofuro[6,5-f][1,3]benzodioxol-5-yl]amino]piperidine-1-carboxylate;hydrochloride			0.583	2.66e-05	0.00159
act	697726	RH1	PK:ROS1	Clinical trial	0.517	2.72e-05	0.00162
act	659950	7-O-(3,4-Di-O-acetyl-2,3,6-trideoxy-2-fluoro-.alpha.-L-t...			0.517	2.74e-05	0.00163
act	300289	Pinafide			0.521	2.8e-05	0.00166
act	658103	[4-[1,2-Bis(propan-2-ylcarbamoyloxymethyl)-6,7-dihydro-5H-pyrrolizin-3-yl]pyridin-1-ium-1-yl]methyl octanoate;iodide			0.516	2.84e-05	0.00168
act	737737	3-(4-isonicotinoyl piperazin-1-yl)-4-phenyl-4H-1,2,4-ben...			0.52	2.89e-05	0.0017
act	683775	Diethyl (2S)-2-[[(2R)-2-amino-3-[4-[bis(2-chloroethyl)amino]phenyl]propanoyl]amino]pentanedioate;2,2,2-trifluoroacetic acid			0.516	2.92e-05	0.00172
act	742307	1,6-dimethoxyphenazine mono-n-oxide			0.523	3e-05	0.00176
act	776678		NA	NA	0.527	3.04e-05	0.00178
act	646276	Kedarcidin	NA	NA	0.558	3.08e-05	0.00179
act	727620	6-[3-(2-Aminoethylamino)]-bis{1-propyl)-5,6-dihydro-2,3-...			0.531	3.08e-05	0.00179
act	684667	2-[(9-Amino-5-methylacridine-4-carbonyl)amino]-N,N-dimethylethanamine oxide;hydrochloride			0.526	3.09e-05	0.0018
act	691849	15-[2-(Dimethylamino)ethyl]-10-[2-(2-hydroxyethylamino)ethylamino]-1,15-diazatetracyclo[7.7.1.02,7.013,17]heptadeca-2,4,6,9,11,13(17)-hexaene-8,14,16-trione;hydrochloride			0.518	3.16e-05	0.00183
act	632792	Ammonia; pentane-1,5-diamine; platinum(2+)			0.583	3.23e-05	0.00187
act	673350	1,4-Bis(oxiran-2-ylmethoxy)anthracene-9,10-dione			0.513	3.25e-05	0.00187
act	332488	Anaxirone			0.52	3.32e-05	0.00191
act	692736	Neuro_000459			0.516	3.33e-05	0.00191
act	31717	tetraethyleniminobenzoquinone			0.519	3.48e-05	0.00199
act	658085	[3-[1,2-Bis(propan-2-ylcarbamoyloxymethyl)-6,7-dihydro-5H-pyrrolizin-3-yl]pyridin-1-ium-1-yl]methyl heptanoate;iodide			0.511	3.5e-05	0.002
act	718631	3-[Bis[2-bromoethyl(methyl)amino]phosphoryloxymethyl]-5-methoxy-1-methylindole-4,7-dione			0.51	3.64e-05	0.00208
act	728316	6-(3-Piperazinyl-1-propyl)-5,6-dihydro-2,3-dimethoxy-8,9...			0.518	3.67e-05	0.00208
act	781335	6-(6-Hydroxy-13-methyl-5,7-dioxo-6,7-dihydro-5H-indolo[2...	NA	NA	0.514	3.68e-05	0.00208
act	711946	N-[3-[6-[7-Acetamido-1-(chloromethyl)-5-hydroxy-1,2-dihydrobenzo[e]indol-3-yl]-6-oxohexanoyl]-1-(chloromethyl)-5-hydroxy-1,2-dihydrobenzo[e]indol-7-yl]acetamide			0.51	3.68e-05	0.00208
act	376739	5,12-Naphthacenedione, 10-[(2,6-dideoxy-.alpha.-L-lyxo-h...			0.518	3.71e-05	0.0021
act	64703	Diethyl(acetylamino)({5-[bis(2-chloroethyl)amino]-1h-indol-3-yl}methyl)propanedioate			0.513	3.79e-05	0.00213
act	349174	Oxanthrazole	TOP2		0.509	3.86e-05	0.00217
act	758255	Teniposide	TOP2	FDA approved	0.513	3.87e-05	0.00217
act	692228	2-[[1-(Chloromethoxy)-2-(dimethylamino)ethyl]amino]-N-[2-[[4-[2-[[2-[[1-(chloromethoxy)-2-(dimethylamino)ethyl]amino]-2-(sulfanylmethylamino)acetyl]amino]ethylamino]-5,8-dihydroxy-9,10-dioxoanthracen-			0.543	3.91e-05	0.00218
act	721385	5-fluoro-2'-deoxyuridyl 5-nitrofuryl N-methyl-N-(4-chlor...			0.509	3.92e-05	0.00218
act	740033	9-Amino-6-(3-azidopropyl)-5,6-dihydro-3-nitro-5,11-dioxo...			0.512	3.99e-05	0.00222
act	733882	6-(3-Azidopropyl)-5,6-dihydro-9-methoxy-3-nitro-5,11-dio...			0.515	4.09e-05	0.00227
act	628674	antineoplastic-d613939			0.523	4.16e-05	0.00231
act	665534	5-Quinolinesulfonic acid, 7,7'-[1,2-ethenediylbis[(3-sul...	NA	NA	0.51	4.26e-05	0.00235
act	734981	Ethyl 4-[2-(methylsulfanyl)-4-oxo-5-phenyl-4,7-dihydro-3...			0.518	4.33e-05	0.00239
act	721513	2-(N,N-bis(2-bromoethyl)phosphorodiamidoxy)methyl-1-meth...			0.526	4.35e-05	0.00239
act	243930	1-Butanesulfonamide, N-[4-(9-acridinylamino)-3-methoxyph...			0.564	4.39e-05	0.00241
act	640076	Hydroxylureal-organogermanium compound			0.549	4.48e-05	0.00245
act	284682	3'-Hydroxydaunorubicin	NA	NA	0.505	4.48e-05	0.00245
act	81767	Cinnamamide, p-[bis(2-bromoethyl)amino]-.alpha.-cyano-			0.513	4.49e-05	0.00245
act	683415	N-[4-[[(5S,5As,8aR,9R)-9-(4-hydroxy-3,5-dimethoxyphenyl)-8-oxo-5a,6,8a,9-tetrahydro-5H-[2]benzofuro[5,6-f][1,3]benzodioxol-5-yl]amino]phenyl]-1-methyl-4-nitropyrrole-2-carboxamide;hydrochloride			0.504	4.66e-05	0.00254
act	709358	1H-Pyrrole-2-carboxamide, N-[3-(dimethylamino)propyl]-1-...			0.504	4.73e-05	0.00256
act	737672	9-Acetamido-6-(3-bromopropyl)-5,6-dihydro-3-nitro-5,11-d...			0.512	4.74e-05	0.00256
act	628671	Methyl 3-[[(5S,8aR)-9-(4-hydroxy-3,5-dimethoxyphenyl)-8-oxo-5a,6,8a,9-tetrahydro-5H-[2]benzofuro[5,6-f][1,3]benzodioxol-5-yl]amino]benzoate			0.562	4.82e-05	0.0026
act	106909	estra-1,3,5[10]-trien-17-one, 3-[[4,6-bis(1-aziridinyl)-...			0.537	4.82e-05	0.0026
act	748643	mitaplatin	NA	NA	0.515	4.87e-05	0.00262
act	210717	9 ohe hcl	NA	NA	0.562	4.88e-05	0.00262
act	645809	10-[2-(Diethylamino)ethylamino]-5-hydroxy-1,14-diazatetracyclo[7.6.1.02,7.013,16]hexadeca-2(7),3,5,9,11,13(16),14-heptaen-8-one;hydrochloride			0.503	4.94e-05	0.00264
act	783073	7-Aza-5, 6-dihydro-6-(3-bromopropyl)-9-methoxy-3-nitro-5...	NA	NA	0.51	4.97e-05	0.00266
act	69830	alanine, n-(n-acetyl-l-leucyl)-3-[p-[bis(2-chloroethyl)a...	NA	NA	0.506	5e-05	0.00266
act	83343	5-[(E)-[4-[Bis(2-chloroethyl)amino]phenyl]methylideneamino]-1,3-thiazole-2-carbonitrile			0.51	5.02e-05	0.00267
act	623128	14-Fluoro-4-demethoxydaunorubicin			0.506	5.04e-05	0.00268
act	651855	(5S,8Ar)-5-[(1-benzylpiperidin-4-yl)amino]-9-(4-hydroxy-3,5-dimethoxyphenyl)-5a,6,8a,9-tetrahydro-5H-[2]benzofuro[6,5-f][1,3]benzodioxol-8-one;hydrochloride			0.555	5.2e-05	0.00275
act	627687	7-Bromo-6a,9b-dihydro-1H-benzo[ij][2,7]naphthyridine			0.554	5.26e-05	0.00278
act	317003	9H-Thioxanthen-9-one, 1-[[2-(dimethylamino)ethyl]amino]-...			0.505	5.38e-05	0.00283
act	651861	(5S,8Ar)-5-[2-(dimethylamino)ethylamino]-9-(4-hydroxy-3,5-dimethoxyphenyl)-5a,6,8a,9-tetrahydro-5H-[2]benzofuro[6,5-f][1,3]benzodioxol-8-one;hydrochloride			0.564	5.39e-05	0.00283
act	266068	L-Leucine, N-[4-[bis(2-chloroethyl)amino]-DL-phenylalany...			0.508	5.39e-05	0.00283
act	785119	;Kiteplatin	NA	NA	0.508	5.45e-05	0.00285
act	758671	ANCITABINE HYDROCHLORIDE	Ds		0.504	5.5e-05	0.00287
act	732534	Phenylboronic acid, 4-[bis[2-[(methylsulfonyl)oxy]ethyl]...			0.508	5.54e-05	0.00289
act	707691	Benzamido 2-methyl-5-phenyl-4-(p-tolyl)-1h-pyrrole-3-carboxylate			0.5	5.58e-05	0.0029
act	185049	Hydrazinecarbothioamide, 2-[[5-(1-oxopropoxy)-2-pyridiny...			0.507	5.67e-05	0.00294
act	642287	3-[[[(5S,8Ar,9R)-9-(4-hydroxy-3,5-dimethoxyphenyl)-8-oxo-5a,6,8a,9-tetrahydro-5H-[2]benzofuro[6,5-f][1,3]benzodioxol-5-yl]amino]methyl]benzonitrile			0.547	5.79e-05	0.003
act	129220	Cyclo-C	NA	NA	0.502	5.89e-05	0.00304
act	281617	Ethanol, 2,2'-[[3-methyl-4-[[[4-[5-methyl-2-(phenylmethy...			0.498	5.93e-05	0.00306
act	725776	LMP776	TOP1	Clinical trial	0.506	5.98e-05	0.00308
act	240533	Benzeneethanamine, 4-[bis(2-chloroethyl)amino]-, monohyd...	NA	NA	0.51	6.01e-05	0.00309
act	740277	5,6-dihydro-6-[3-(2-hydroxyethyl)amino-1-propyl]-9-metho...			0.501	6.11e-05	0.00313
act	50076	D-Mannitol, 1,6-bis[bis(2-chloroethyl)amino]-1,6-dideoxy...	NA	NA	0.517	6.15e-05	0.00314
act	736394	6-(3-Aminopropyl)-9-fluoro-5,6-dihydro-3-nitro-5,11-diox...			0.501	6.17e-05	0.00314
act	775548	1,1-bis(p-hydroxyphenyl)-2-ferrocenyl-5-hydroxy-pent-1-ene	NA	NA	0.517	6.22e-05	0.00317
act	276382	pepleo	Db		0.497	6.26e-05	0.00318
act	658083	[3-[1,2-Bis(propan-2-ylcarbamoyloxymethyl)-6,7-dihydro-5H-pyrrolizin-3-yl]pyridin-1-ium-1-yl]methyl pentanoate;iodide			0.497	6.28e-05	0.00318
act	683777	Ethyl (4S)-4-amino-5-[[(2R)-3-[4-[bis(2-chloroethyl)amino]phenyl]-1-ethoxy-1-oxopropan-2-yl]amino]-5-oxopentanoate;2,2,2-trifluoroacetic acid			0.497	6.31e-05	0.00319
act	693546	1H-Benz[e]indol-5-amine, 1-(chloromethyl)-2,3-dihydro-N-...			0.517	6.34e-05	0.0032
act	735493	5,6-Dihydro-6-(3-imidazolyl-1-propyl)-2,3-dimethoxy-5,11...			0.5	6.36e-05	0.0032
act	726770	Cis-6-(2-dimethylamino-1-ethyl)-5,6,12,13-tetrahydro-2,3...			0.5	6.4e-05	0.00321
act	631304	cis-Amminedichloro[2-(3,4-dimethoxyphenyl)ethylamine] pl...			0.549	6.44e-05	0.00323
act	672975		NA	NA	0.496	6.46e-05	0.00323
act	736116	6-(3-Amonopropyl)-5,6-dihydro-9-methyl-3-nitro-5,11-diox...			0.499	6.56e-05	0.00328
act	142543	9h-fluoren-2-amine, n,n-bis(2-bromoethyl)- (9ci)	NA	NA	0.507	6.58e-05	0.00328
act	798823	;6-(N-Methyl-2-aminoethoxy)-11-(3,4,5-trimethoxyphenyl)p...	NA	NA	0.499	6.77e-05	0.00336
act	687369	[5-(5-Fluoro-2,4-dioxopyrimidin-1-yl)-2-[[[5-[4-(hexadecanoylamino)-2-oxopyrimidin-1-yl]-2-(hydroxymethyl)oxolan-3-yl]oxy-hydroxyphosphoryl]oxymethyl]oxolan-3-yl] acetate			0.499	6.78e-05	0.00336
act	783233		NA	NA	-0.498	6.83e-05	0.00338
act	727625	cis-6-(3-Bromopropyl)-5,6,12,13-tetrahydro-2,3-dimethoxy...			0.506	6.86e-05	0.00339
act	728318	6-[3-(3-Hydroxypiperidinyl)-1-propyl]-5,6-dihydro-2,3-di...			0.501	7.29e-05	0.00359
act	741106	6-(3-aminopropyl)-5,6-dihydro-9-methoxycarbonyl-3-nitro-...			0.497	7.33e-05	0.00361
act	787305	;3-chloro-6-(3-(4-hydroxypiperidin-1-yl)propyl)-9-methox...	NA	NA	0.504	7.36e-05	0.00361
act	787877		NA	NA	0.507	7.93e-05	0.00388
act	644959	MCS-687			0.559	7.94e-05	0.00388
act	167780	Asaley	A7		0.491	8.01e-05	0.00391
act	726769	5,6-Dihydro-6-(4-amino-1-butyl)-5,11-dioxo-11H-indeno{1,...			0.494	8.1e-05	0.00394
act	294979	bleomycin bapp	NA	NA	0.494	8.15e-05	0.00396
act	734980	Ethyl 3-[2-(methylsulfanyl)-4-oxo-5-phenyl-4,7-dihydro-3...			0.502	8.23e-05	0.00399
act	734799	6-(3-Bromopropyl)-9-fluoro-5,6-dihydro-3-nitro-5,11-diox...			0.514	8.28e-05	0.00401
act	98572	.beta.-Resorcylaldehyde, 2-pyridylhydrazone			0.497	8.52e-05	0.00411
act	641459	Azane;2-chloroacetate;hexane-1,6-diamine;platinum(4+)			0.541	8.63e-05	0.00416
act	254681	12-Iminodaunorubicin HCl	NA	NA	0.492	8.69e-05	0.00418
act	797930		NA	NA	0.492	8.78e-05	0.00421
act	53396	actinogen	NA	NA	0.492	8.84e-05	0.00423
act	616241	antineoplastic-616241	NA	NA	0.545	8.92e-05	0.00426
act	658929	Bis(2-chloroethyl)-N-methyl-N-(3-methyl-2-nitrobenzyl)am...			0.487	9.16e-05	0.00437
act	658084	[3-[1,2-Bis(propan-2-ylcarbamoyloxymethyl)-6,7-dihydro-5H-pyrrolizin-3-yl]pyridin-1-ium-1-yl]methyl hexanoate;iodide			0.487	9.27e-05	0.00441
act	689140	1H,3H-Benzo[c]pyrrolo[3,4-a]carbazole-1,3-dione, 2,3a,3b...			0.487	9.28e-05	0.00441
act	651854	(5S,8Ar)-5-[(1-benzylpiperidin-4-yl)amino]-9-(4-hydroxy-3,5-dimethoxyphenyl)-5a,6,8a,9-tetrahydro-5H-[2]benzofuro[6,5-f][1,3]benzodioxol-8-one			0.539	9.31e-05	0.00441
act	694456	5-Acetamido-N-[5-[5-amino-1-(chloromethyl)-1,2-dihydrobenzo[e]indole-3-carbonyl]-2-methylpyrazol-3-yl]-1-methylpyrazole-3-carboxamide			0.486	9.53e-05	0.00451
act	156305	Methanesulfonamide, N-[4-(9-acridinylamino)phenyl]-, met...			0.486	9.58e-05	0.00452
act	666766	2,5-Bis(4-hydroxybenzylidene)cyclopentanone			0.486	9.59e-05	0.00452
act	713048	2-[4-Amino-6-(3,5,5-trimethyl-4,5-dihydro-1h-pyrazol-1-yl)-1,3,5-triazin-2-yl]benzenesulfonamide			0.519	9.69e-05	0.00456
act	342610	STL523755			0.485	9.74e-05	0.00457
act	762	Nitrogen mustard	A7|AlkAg	FDA approved	0.485	9.94e-05	0.00466
act	698451	N-[(E)-[(E)-3-Phenylprop-2-enylidene]amino]-2-[2-[[(E)-[(E)-3-phenylprop-2-enylidene]amino]carbamoyl]anilino]benzamide			0.492	0.000101	0.00472
act	606869	Clofarabine	Ds	FDA approved	0.488	0.000101	0.00471
act	675574	6-(2-(Diethylamino)ethyl)-8,10-dimethylpurino[7,8-a]quinazoline-5,9,11(6H,8H,10H)-trione			0.488	0.000102	0.00476
act	246112	maiq i			0.484	0.000103	0.00478
act	680420	[5-(5-Fluoro-2,4-dioxopyrimidin-1-yl)-2-(hydroxymethyl)oxolan-3-yl] [5-[5-fluoro-4-(hexadecylamino)-2-oxopyrimidin-1-yl]-3-hydroxyoxolan-2-yl]methyl hydrogen phosphate			0.484	0.000104	0.00485
act	146067	malonatodiammineplatinum(ii)	NA	NA	0.55	0.000109	0.00503
act	734296	6-(3-Bromopropyl)-5,6-dihydro-8,9-dimethoxy-3-nitro-5,11...			0.494	0.000109	0.00504
act	92423	Uridine, 2'-deoxy-5-(trifluoromethyl)-, 3',5'-bis(p-nitr...			0.49	0.000109	0.00503
act	344505	5H-[1,3]Dioxolo[5,6]indeno[1,2-c]isoquinoline- 5,12(6H)-...	NA	NA	0.482	0.00011	0.00507
act	292684	Urea, N-[2-[(2-chloroethyl)thio]ethyl]-N'-cyclohexyl-N-n...			0.486	0.000111	0.00512
act	733654	6-(3-Chloropropyl)-5,6-dihydro-9-methoxy-3-nitro-5,11-di...			0.489	0.000113	0.00518
act	619003	MX2 HCl			0.485	0.000113	0.00518
act	671900	10,11-Methylenedioxy-20(S)-glycinyl camptothecin hydroch...	NA	NA	0.481	0.000113	0.00518
act	350895	pingyangmycin	NA	NA	0.527	0.000117	0.00533
act	784576		NA	NA	0.492	0.000118	0.00538
act	128687	6h-furo[2',3',4,5]oxazolo[3,2-a]pyrimidine-2-methanol, 6...	NA	NA	0.48	0.000119	0.00539
act	141523	platinum, diamminedibromo-, cis- (8ci)	NA	NA	0.536	0.000122	0.00552
act	791639		NA	NA	0.487	0.000122	0.00552
act	83219	N-(p-Styrylphenyl)acetohydroxamic acid	NA	NA	0.487	0.000123	0.00554
act	708447	[2-[[[5-(4-Amino-2-oxopyrimidin-1-yl)-3,4-dihydroxyoxolan-2-yl]methoxy-hydroxyphosphoryl]oxymethyl]-5-(5-fluoro-2,4-dioxopyrimidin-1-yl)oxolan-3-yl] [3,4-dihydroxy-5-[4-(octadecylamino)-2-oxopyrimidin			0.483	0.000123	0.00556
act	205105	isoquinaldaldehyde, 5-amino-, thiosemicarbazone (8ci)	NA	NA	0.486	0.000126	0.00566
act	139484	methanesulfonamide, n-[3-methoxy-4-[(5-methyl-3-nitro-9-...			0.486	0.000127	0.00569
act	145668	Ancitabine hydrochloride	Ds		0.478	0.000128	0.00573
act	269720	Androstan-17-one, 3-[[[(2-chloroethyl)nitrosoamino]carbo...			0.485	0.000132	0.00592
act	783074	7-Aza-5,6-dihydro-6-[3-(4-pyrrolidine-1-yl)propyl]-9-met...	NA	NA	0.485	0.000133	0.00592
act	642916	[5-[[2-Chloroethyl(nitroso)carbamoyl]amino]-3-hydroxy-2-(hydroxymethyl)-6-methoxyoxan-4-yl] hexadecanoate			0.573	0.000135	0.00604
act	628677	(5S,8Ar)-5-(3,4-dimethoxyanilino)-9-(4-hydroxy-3,5-dimethoxyphenyl)-5a,6,8a,9-tetrahydro-5H-[2]benzofuro[5,6-f][1,3]benzodioxol-8-one			0.555	0.000138	0.00614
act	250686	Cytosine, 1.beta.-D-arabinofuranosyl-N(sup 4)-lauroyl-			0.533	0.000138	0.00615
act	68989	alanine, 3-[p-[bis(2-chloroethyl)amino]phenyl]-n-(n-form...			0.487	0.00014	0.0062
act	693118	15-[2-(Dimethylamino)ethyl]-10-[2-(dimethylamino)ethyl-methylamino]-1,15-diazatetracyclo[7.7.1.02,7.013,17]heptadeca-2,4,6,9,11,13(17)-hexaene-8,14,16-trione			0.476	0.00014	0.0062
act	1797	o-Aminoazotoluene	NA	NA	0.494	0.000144	0.00637
act	725665	12-(2'-Aminoethylidene)-5,6-dihydro-5,11-diketo-2,3-dime...			0.486	0.000144	0.00637
act	224070	AZIRIDINYL BENZOQUINONE			0.486	0.000146	0.00643
act	647928	HGQCWSSCAYOKJM-UHFFFAOYSA-N			0.49	0.000147	0.00647
act	618659	2-(2-Ethyl-6-propan-2-ylanilino)-3-(4-methylpyridin-1-ium-1-yl)naphthalene-1,4-dione;perchlorate			0.478	0.00015	0.00657
act	736494	6-(3-Aminopropyl)-9-chloro-5,6-dihydro-3-nitro-5,11-diox...			0.478	0.00015	0.00659
act	301480	1H-Pyrrole-3,4-dimethanol, 2-[1,1'-biphenyl]-4-yl-1,5-di...			0.474	0.000151	0.00659
act	660027	4-[(5S,8Ar)-5-(4-fluoroanilino)-5,5a,6,8,8a,9-hexahydro-[2]benzofuro[6,5-f][1,3]benzodioxol-9-yl]-2,6-dimethoxyphenol			0.535	0.000152	0.00662
act	737344	6-(3-Aminopropyl)-5,6-dihydro-2,3,9-trimethoxy-5,11-diox...			0.477	0.000153	0.00667
act	740521	Indenoisoquinoline derivative	TOP1		0.477	0.000154	0.00667
act	281613	Ethanol, 2,2'-[[4-[[[3-chloro-4-(2-phenyl-4-thiazolyl)ph...			0.472	0.000158	0.00684
act	17275	2-[Bis(2-chloroethyl)aminomethyl]-4-[3-[bis(2-chloroethyl)aminomethyl]-4-hydroxy-5-prop-2-enylphenyl]-6-prop-2-enylphenol;hydrochloride			0.518	0.000162	0.007
act	652175	2-Pyrazolin-5-one, 1-[(2-hydroxyphenyl)carbonyl]- 3-meth...			0.479	0.000162	0.00702
act	670653	[5-(5-Fluoro-2,4-dioxopyrimidin-1-yl)-3-hydroxyoxolan-2-yl]methyl bis(2,2,2-trichloroethyl) phosphate			0.487	0.000165	0.00711
act	371168	Hydrazinecarboximidamide, 2-[(3,5-dibromo-2-hydroxypheny...	NA	NA	0.471	0.000165	0.00711
act	782772	(S)-2,3-dichloro-6-(2,3-dihydroxypropyl)-5H-[1,3]dioxolo...	NA	NA	0.478	0.000168	0.00723
act	256438	Medorubicin	NA	NA	0.478	0.00017	0.00731
act	733981	gamma-glutamyl-alpha-amino-beta-[[2-ethyl(5-fluoro-2'deo...			0.477	0.000176	0.00754
act	665935	(5S,5As,8aR,9R)-9-(4-hydroxy-3,5-dimethoxyphenyl)-5-[2-(2-hydroxyethylamino)ethylamino]-5a,6,8a,9-tetrahydro-5H-[2]benzofuro[6,5-f][1,3]benzodioxol-8-one			0.473	0.000177	0.00757
act	311152	9-Hydroxy-2-(.beta.-diethylaminoethyl)ellipticinium acetate	NA	NA	0.469	0.000178	0.00758
act	726971	6-[3-(1,1'-Dimethyl-2-hydroxyethyl)amino-1-propyl]-5,6-d...			0.473	0.000179	0.00761
act	164878	1-N,4-N-Bis[(E)-[4-[bis(2-chloroethyl)amino]phenyl]methylideneamino]benzene-1,4-dicarboxamide			0.488	0.000181	0.00772
act	307990	5,12-Naphthacenedione, 10-[(3,4-di-O-acetyl-2,6-dideoxy-...	NA	NA	0.476	0.000182	0.00774
act	685797	7H-Purine-6-amine,2-bromo-7-(2-deoxy-.beta.-D-erythropen...			0.468	0.000186	0.00787
act	642285	N-[(5S,8Ar,9R)-9-(4-hydroxy-3,5-dimethoxyphenyl)-8-oxo-5a,6,8a,9-tetrahydro-5H-[2]benzofuro[5,6-f][1,3]benzodioxol-5-yl]-4-nitrobenzamide			0.514	0.000187	0.0079
act	638834	Nitratobis(pyridinethiosemicarbazone-S,N1)bismuth(III)	NA	NA	0.534	0.000189	0.008
act	683288		NA	NA	0.471	0.00019	0.00801
act	633253	4,8-Ethenobenzo[1,2-c:4,5-c']dipyrrole-1,3,5,7(2H,6H)- t...			0.508	0.000192	0.00807
act	697686		NA	NA	0.467	0.000194	0.00813
act	645810	10-[3-(Dimethylamino)propylamino]-5-hydroxy-1,14-diazatetracyclo[7.6.1.02,7.013,16]hexadeca-2(7),3,5,9,11,13(16),14-heptaen-8-one;hydrochloride			0.467	0.000196	0.00821
act	88104	sri 2636			0.533	0.000198	0.00828
act	663791	[5-(5-Fluoro-2,4-dioxopyrimidin-1-yl)-3-hydroxyoxolan-2-yl]methyl butanoate			0.466	0.000199	0.00833
act	785623	;5,6-Dihydro-6-(piperidin-4-yl)-2,3-dimethoxy-8,9-methyl...	NA	NA	0.481	0.000201	0.00838
act	653008	2-Chloro-1-((4-hydroxy-6-methyl-2-pyrimidinyl)amino)-4-(3-hydroxyphenyl)-3-azetidinone			0.549	0.000202	0.00843
act	250684	Cytosine, 1.beta.-D-arabinofuranosyl-N(sup 4)-palmitoyl-			0.465	0.000204	0.00846
act	600167	Diazene, hydroxy(5-phenyl-2-pyridinyl)-, sodium salt	NA	NA	0.465	0.000205	0.00852
act	628666	(5S,8Ar)-9-(4-hydroxy-3,5-dimethoxyphenyl)-5-(quinolin-3-ylamino)-5a,6,8a,9-tetrahydro-5H-[2]benzofuro[5,6-f][1,3]benzodioxol-8-one			0.521	0.000208	0.00862
act	687304	hydrazinecarbothioamide, 2-[[4-(acetyloxy)-5-methyl- 1-i...			0.464	0.000212	0.00877
act	759096	Triapine	Dr|CC	Clinical trial	0.487	0.00022	0.00906
act	691246		NA	NA	0.467	0.00022	0.00906
act	134725	K 33			0.466	0.000224	0.0092
act	693167	[3-Azido-5-(5-methyl-2,4-dioxopyrimidin-1-yl)oxolan-2-yl]methyl [5-(5-fluoro-2,4-dioxopyrimidin-1-yl)-3-hydroxyoxolan-2-yl]methyl hydrogen phosphate			0.466	0.000229	0.00938
act	634763		NA	NA	0.508	0.000231	0.00948
act	653863	Ethyl 4-[[(5S,5aS)-9-(4-hydroxy-3,5-dimethoxyphenyl)-8-oxo-5a,6,8a,9-tetrahydro-5H-[2]benzofuro[6,5-f][1,3]benzodioxol-5-yl]amino]piperidine-1-carboxylate			0.522	0.000233	0.00955
act	651857	(5S,8Ar)-9-(4-hydroxy-3,5-dimethoxyphenyl)-5-(2-morpholin-4-ylethylamino)-5a,6,8a,9-tetrahydro-5H-[2]benzofuro[6,5-f][1,3]benzodioxol-8-one;hydrochloride			0.512	0.000235	0.00959
act	683910	3-Methyl-2-thiophenecarbaldehyde (7-methoxy-4-methyl-2-quinolinyl)hydrazone			-0.477	0.000235	0.00959
act	630765		NA	NA	0.512	0.000238	0.00967
act	205862	N-(4-Chlorobenzyl)-N'-(2,5-dimethylphenyl)urea			0.472	0.00024	0.00973
act	162700	Hydrazinecarbothioamide, 2-(1-isoquinolinylmethylene)-, ...			0.464	0.00024	0.00972
act	740609	5,6-dihydro-6-(3-morpholinyl-1-propyl)-3-nitro-5,11-diox...			0.464	0.00024	0.00972
act	648316		NA	NA	0.506	0.000243	0.00982
act	107392	5-HP	Ds		0.46	0.000243	0.00982
act	51143	Pyrazoloimidazole	Ds|Rs		0.515	0.000248	0.00998
act	612941	1-(2,5,6,11-Tetramethylpyrido[4,3-b]carbazol-2-ium-9-yl)ethanone;iodide			0.52	0.000251	0.0101
act	679241		NA	NA	0.479	0.000252	0.0101
act	641465	Platinum, N,N''-(1,9-nonanediyl)bis[diaminodichloro-, (S...	NA	NA	0.5	0.000254	0.0102
act	380212	st-daae-1,4-(ii)			0.463	0.000255	0.0102
act	301477	antineoplastic-301477	NA	NA	0.462	0.000258	0.0103
act	278214	carbamic acid, (1-methylethyl)-, [5-(3,4-dichlorophenyl)...			0.499	0.000263	0.0105
act	754244	5-(3-(dimethylamino)propyl)-2,3,9-trimethoxy-5h-indeno[1...			0.466	0.000263	0.0105
act	740507	5,6-dihydro-6-(3-imidazolyl-1-propyl)-9-methoxy-3-nitro-...			0.462	0.000263	0.0105
act	628680	(5S,8Ar)-5-anilino-9-(4-hydroxy-3,5-dimethoxyphenyl)-5a,6,8a,9-tetrahydro-5H-[2]benzofuro[5,6-f][1,3]benzodioxol-8-one			0.513	0.000268	0.0106
act	643006	[5-[[2-Chloroethyl(nitroso)carbamoyl]amino]-3,4-dihydroxy-6-methoxyoxan-2-yl]methyl octanoate			0.508	0.000269	0.0106
act	170105	Auromomycin	NA	NA	0.498	0.000269	0.0106
act	81303	N-Fluoranthen-2-ylacetamide			0.468	0.000272	0.0107
act	699383		NA	NA	0.468	0.000274	0.0108
act	757087	Nitrogen mustard	A7|AlkAg	FDA approved	0.464	0.000276	0.0109
act	256439	Idarubicin	TOP2	FDA approved	0.457	0.000276	0.0109
act	642290	4-Acetyl-N-[(5S,8aR,9R)-9-(4-hydroxy-3,5-dimethoxyphenyl)-8-oxo-5a,6,8a,9-tetrahydro-5H-[2]benzofuro[5,6-f][1,3]benzodioxol-5-yl]benzamide			0.501	0.000285	0.0112
act	703104	N-[(E)-1-Pyrimidin-4-ylethylideneamino]-1H-benzimidazol-2-amine			0.456	0.000289	0.0113
act	782893		NA	NA	0.459	0.000292	0.0114
act	642291	[4-[[(5S,8Ar,9R)-9-(4-hydroxy-3,5-dimethoxyphenyl)-8-oxo-5a,6,8a,9-tetrahydro-5H-[2]benzofuro[5,6-f][1,3]benzodioxol-5-yl]carbamoyl]phenyl] acetate			0.5	0.000295	0.0115
act	733884	6-(3-Aminopropropyl)-5,6-dihydro-9-methoxy-3-nitro-5,11-...			0.465	0.0003	0.0117
act	787302	;3-chloro-9-methoxy-6-(3-morpholinopropyl)-5H-pyrido[3',...	NA	NA	0.503	0.000315	0.0123
act	719211	11-(4'-Iodobutylidene)-5,6-dihydro-2,3-dimethoxy-6-methy...			0.453	0.000319	0.0124
act	628664	(5S,8Ar)-9-(4-hydroxy-3,5-dimethoxyphenyl)-5-(4-morpholin-4-ylanilino)-5a,6,8a,9-tetrahydro-5H-[2]benzofuro[5,6-f][1,3]benzodioxol-8-one			0.523	0.000321	0.0124
act	789550	;3-chloro-9-methoxy-6-(3-(pyrrolidin-1-yl)propyl)-5H-pyr...	NA	NA	0.458	0.000335	0.013
act	83950	nigrin	NA	NA	0.462	0.000342	0.0132
act	790513	;6-(3-((4,5-dihydrothiazol-2-yl)amino)propyl)-3-fluoro-9...	NA	NA	0.458	0.000343	0.0132
act	682756	Spiro[4H-1-benzazepine-4,1'-cyclohexane]-2,5(1H,3H)-dion...			0.45	0.000344	0.0132
act	687744	Methyl (2S)-2-[[(2R)-2-amino-3-[4-[bis(2-chloroethyl)amino]phenyl]propanoyl]amino]-3-methylbutanoate;2,2,2-trifluoroacetic acid			0.45	0.00035	0.0134
act	740974	6-(3-azidopropyl)-9-cyano-5,6-dihydro-3-nitro-5,11-dioxo...			0.461	0.000353	0.0136
act	3262	2,5-Bis(ethylamino)hydroquinone			0.453	0.000356	0.0136
act	639186	Raltitrexed	Ds|DHFR|TYMS	FDA approved	0.481	0.000358	0.0137
act	103704		NA	NA	0.449	0.00036	0.0138
act	669728	[3-[(2E,4E,6E,8E)-3,7-Dimethyl-9-(2,6,6-trimethylcyclohexen-1-yl)nona-2,4,6,8-tetraenoyl]oxy-5-(5-fluoro-2,4-dioxopyrimidin-1-yl)oxolan-2-yl]methyl (2E,4E,6E,8E)-3,7-dimethyl-9-(2,6,6-trimethylcyclohe			0.452	0.000364	0.0139
act	783072		NA	NA	0.452	0.000367	0.014
act	264137	Elliptinium Acetate	TOP2	Clinical trial	0.455	0.000375	0.0143
act	730009	cis-2,5,6,12,13-Pentahydro-6-methyl-(8,9-methylenedioxy)...			0.47	0.000378	0.0143
act	757000	ww-h1	HDAC		0.466	0.000378	0.0143
act	644221		NA	NA	0.462	0.000384	0.0145
act	281817	Ethanol, 2,2'-[[4-[[[4-[2-(4-bromophenyl)-4-thiazolyl]ph...			0.447	0.000387	0.0146
act	614049	1-Phenazinol, 7,8-bis[(4-morpholinyl)methyl]-, 5,10- dio...			0.491	0.000391	0.0147
act	682148	Methyl isonuapauanoate			0.447	0.000392	0.0147
act	741292	6-(3-hydroxy-4-methoxyphenyl)-5-[(3,4,5-trimethoxyphenyl...			0.453	0.000403	0.0151
act	713673	3-[6,13-Dichloro-3-[2-(3-ethoxy-4-hydroxyphenyl)-4-oxo-1,3-thiazolidin-3-yl]-[1,4]benzoxazino[2,3-b]phenoxazin-10-yl]-2-(3-ethoxy-4-hydroxyphenyl)-1,3-thiazolidin-4-one			0.472	0.000405	0.0152
act	637140	9-N-(N'-bis-chloroethyl-N-1,5-diaminopentyl)-2-methoxy a...	NA	NA	0.449	0.000408	0.0153
act	673594	7-Methyl-10,11-methylenedioxy-20(S)-camptothecin			0.445	0.000419	0.0157
act	648365	insulin-methotrexate conjugate	NA	NA	0.489	0.00042	0.0157
act	740275	5,6-dihydro-6-(3-morpholinyl-1-propyl)-5,11-dioxo-11h-in...			0.448	0.000424	0.0158
act	651860	(5S,8Ar)-5-[2-(dimethylamino)ethylamino]-9-(4-hydroxy-3,5-dimethoxyphenyl)-5a,6,8a,9-tetrahydro-5H-[2]benzofuro[6,5-f][1,3]benzodioxol-8-one			0.508	0.000429	0.016
act	135962	p-ara-c	NA	NA	0.447	0.000429	0.016
act	680418	[5-(5-Fluoro-2,4-dioxopyrimidin-1-yl)-3-hydroxyoxolan-2-yl]methyl (2-hydroxy-3-octadecoxypropyl) hydrogen phosphate			0.444	0.000433	0.0161
act	710270	Karenitecin	TOP1	Clinical trial	0.447	0.000436	0.0162
act	134723	K 31			0.462	0.000441	0.0163
act	9037	3h-xanthen-3-one, 2,6,7-trihydroxy-9-(o-hydroxy-phenyl)-			0.461	0.000446	0.0165
act	628675	(5S,8Ar)-9-(4-hydroxy-3,5-dimethoxyphenyl)-5-[3-(hydroxymethyl)anilino]-5a,6,8a,9-tetrahydro-5H-[2]benzofuro[5,6-f][1,3]benzodioxol-8-one			0.496	0.000451	0.0166
act	166641	aafc	NA	NA	0.482	0.000458	0.0169
act	336628	MERBARONE	NA	NA	0.449	0.00046	0.0169
act	740270	6-(10'-tert-boc-aminodecyl)-5,6-dihydro-5,11-dioxo-11h-i...			0.452	0.000463	0.017
act	652173	(4E)-2-(2-Hydroxybenzoyl)-4-[(2-hydroxyphenyl)methylene]-5-methyl-pyrazol-3-one			0.445	0.000465	0.017
act	740648	5,6-dihydro-6-(3-imidazolyl-1-propyl)-9-methoxy-5,11-dio...			0.445	0.000466	0.0171
act	782771	6-(3-(1H-imidazol-1-yl)propyl)-2,3-dichloro-5H-[1,3]diox...	NA	NA	0.448	0.000469	0.0171
act	341936	Adenosine, 2-bromo-2'-deoxy-	NA	NA	0.445	0.000471	0.0172
act	123976	Neriifolin	NA	NA	0.463	0.000479	0.0175
act	112965	BRD-K68192143-001-01-5			0.443	0.000495	0.018
act	185055	[6-[(E)-(Carbamothioylhydrazinylidene)methyl]pyridin-3-yl] 2-(2,4,5-trichlorophenoxy)acetate			0.454	0.000498	0.0181
act	102051	9B35R9JIHA			0.519	0.000503	0.0182
act	683402	[2-(Isopropylcarbamoyloxymethyl)-7-methoxy-1-methyl-benzo[g]indol-3-yl]methyl N-isopropylcarbamate			0.458	0.000504	0.0183
act	657722	3-(2-chlorobenzylsulfonyl)-3-(2-chlorophenyl)-N-(2,6-dim...			0.446	0.000505	0.0183
act	665934	Furo[3',4':6,7]naptho[2,3-d]-1,3-dioxol-6(5H)-one, 5a,8,...			0.446	0.000507	0.0183
act	77039	8-[Bis(2-chloroethyl)aminomethyl]-7-hydroxy-4-methylchromen-2-one;hydrochloride			0.446	0.000508	0.0183
act	138429	cytosine, 1-.beta.-d-arabinofuranosyl-, 2',3',5'-tributy...			0.492	0.000512	0.0184
act	731409	6-Chloro-9-[[4-(chloromethyl)phenyl]methyl]purine			0.446	0.000514	0.0185
act	766921	(s)-3-(3-aminopyrrolidine-1-carbonyl)-4,11-dihydroxy-2-m...	NA	NA	0.453	0.000517	0.0185
act	646278	Pyrido[3',4':4,5]thieno[2,3-g]isoquinoline, 6-methyl-			0.445	0.000517	0.0185
act	728855	Bis-{(5,6-dihydro-5,11-diketo-11H-indeno[1,2-c]isoquinol...			0.442	0.000522	0.0187
act	801199	;Platin-L	NA	NA	0.441	0.000523	0.0187
act	793460	;NTD-191	NA	NA	0.441	0.000529	0.0189
act	632608	Diammine-1,7,10,16-tetraoxa-4,13-diazacyclooctadecane- p...			0.491	0.000536	0.0191
act	109229	Asparaginase	AM|Pi	FDA approved	0.437	0.000536	0.0191
act	651856	(5S,8Ar)-9-(4-hydroxy-3,5-dimethoxyphenyl)-5-(2-morpholin-4-ylethylamino)-5a,6,8a,9-tetrahydro-5H-[2]benzofuro[6,5-f][1,3]benzodioxol-8-one			0.486	0.000538	0.0191
act	134727	Mitomycin	A2	FDA approved	0.437	0.000542	0.0192
act	642286	N-[(5S,8Ar,9R)-9-(4-hydroxy-3,5-dimethoxyphenyl)-8-oxo-5a,6,8a,9-tetrahydro-5H-[2]benzofuro[5,6-f][1,3]benzodioxol-5-yl]-4-aminobenzamide			0.481	0.000546	0.0193
act	648910	Hydramycin			0.436	0.000554	0.0196
act	642276	[(5S,8Ar,9R)-9-(4-hydroxy-3,5-dimethoxyphenyl)-8-oxo-5a,6,8a,9-tetrahydro-5H-[2]benzofuro[5,6-f][1,3]benzodioxol-5-yl] 3-aminobenzoate			0.484	0.000567	0.02
act	30706	chinon			0.435	0.000572	0.0202
act	699491	Epidoxoform			0.435	0.000578	0.0203
act	169534	Adriamycin-DNA hydrochloride	NA	NA	0.435	0.000578	0.0203
act	693169	[3,4-dihydroxy-5-[4-(octadecylamino)-2-oxopyrimidin-1-yl]oxolan-2-yl]methyl [5-(5-fluoro-2,4-dioxopyrimidin-1-yl)-3-hydroxyoxolan-2-yl]methyl hydrogen phosphate			0.434	0.000585	0.0205
act	234714	Aphidicolin			0.488	0.000586	0.0205
act	144055	hydrazinecarbothioamide, 2-[[5-(acetyloxy)-2-pyridinyl]m...			0.445	0.000593	0.0207
act	122621		NA	NA	0.44	0.000607	0.0212
act	117187	Indole-2,3-dione, 5,7-dichloro-, 3-[(o-nitrophenyl) hydr...			0.433	0.000608	0.0212
act	683776	Ethyl (4S)-4-amino-5-[[(2S)-3-[4-[bis(2-chloroethyl)amino]phenyl]-1-ethoxy-1-oxopropan-2-yl]amino]-5-oxopentanoate;2,2,2-trifluoroacetic acid			0.433	0.000617	0.0215
act	48006	5-Fluoro-2-Deoxycytidine	NA	NA	0.443	0.000621	0.0216
act	177499	Tomaymycin	NA	NA	0.436	0.000625	0.0217
act	619012	RD3GVR673P			0.506	0.000627	0.0217
act	698688	[3-[[5-(4-Amino-2-oxopyrimidin-1-yl)-3,4-dihydroxyoxolan-2-yl]methoxy-hydroxyphosphoryl]oxy-2-octadecoxypropyl] [5-(5-fluoro-2,4-dioxopyrimidin-1-yl)-3-hydroxyoxolan-2-yl]methyl hydrogen phosphate			0.436	0.000627	0.0217
act	724904	N-methylamino-N'-[(5-nitro-2-thienyl)methylidene]-N''-(2...			-0.439	0.00063	0.0218
act	134459	acetamide, n-(2-mercaptoethyl)-, benzoate (6ci, 7ci)			0.443	0.000638	0.022
act	651852	4-[[(5S,8Ar)-9-(4-hydroxy-3,5-dimethoxyphenyl)-8-oxo-5a,6,8a,9-tetrahydro-5H-[2]benzofuro[5,6-f][1,3]benzodioxol-5-yl]amino]benzoic acid			0.48	0.000643	0.0222
act	725774	6-[3-(Bis-hydroxyethylamino)-1-propyl]-5,6-dihydro-2,3-~...			0.435	0.000653	0.0225
act	706737	9-Tert-butyl-16-methyl-4-(4-phenoxyphenyl)-4,20-diazapentacyclo[11.7.0.02,6.07,12.014,19]icosa-1(13),14(19),15,17-tetraene-3,5-dione			0.431	0.000653	0.0225
act	694501	BN-2629	Db	Clinical trial	0.434	0.000661	0.0227
act	100770	benzenamine, n,n-bis(2-chloroethyl)-3-methyl-4-[[[4-[2-(...			0.438	0.000664	0.0228
act	85459	wln: t6n dotj a1r bq cq d1- at6n dotj			0.434	0.000673	0.023
act	698685	[5-(4-Amino-2-oxopyrimidin-1-yl)-3,4-dihydroxyoxolan-2-yl]methyl [3,4-dihydroxy-5-[4-(octadecylamino)-2-oxopyrimidin-1-yl]oxolan-2-yl]methyl hydrogen phosphate			0.437	0.000687	0.0235
act	317921	9H-Thioxanthen-9-one, 1-[[2-(diethylamino)ethyl]amino]-7...			0.467	0.000717	0.0245
act	633258	4,8-Ethenobenzo[1,2-c:4,5-c']dipyrrole-1,3,5,7-tetrone, ...			0.467	0.000718	0.0245
act	123111	t 53			0.431	0.000727	0.0248
act	693119	15-[2-(Dimethylamino)ethyl]-10-[2-(dimethylamino)ethylamino]-5-hydroxy-1,15-diazatetracyclo[7.7.1.02,7.013,17]heptadeca-2(7),3,5,9,11,13(17)-hexaene-8,14,16-trione			0.428	0.000729	0.0248
act	21669	2-methoxyphenazine, 5,10-dioxide	NA	NA	0.446	0.000731	0.0248
act	146208	zorbamycin, dihydrochloride	DDI|RDI		0.48	0.000733	0.0249
act	624239	Polyethylene Glycol L-Asparaginase	NA	NA	0.524	0.000742	0.0251
act	650577		NA	NA	0.475	0.000746	0.0252
act	17273	Propyl quinacrine mustard	NA	NA	0.427	0.000754	0.0255
act	642520	STK687015			0.511	0.000757	0.0255
act	659949	14-Bromo-7-O-(2,3,6-trideoxy-2-fluoro-.alpha.-L-talo-hex...			0.426	0.000759	0.0255
act	696125	OFYWATWIUCJIGO-UHFFFAOYSA-N			0.43	0.000761	0.0256
act	131258	4-(Dimethylaminodiazenyl)-5-methyl-N-[(E)-thiophen-2-ylmethylideneamino]-1H-pyrazole-3-carboxamide			0.437	0.000764	0.0256
act	818002	SCH900353	NA	NA	-0.44	0.000768	0.0257
act	712430	2-[4-[(2Z)-2-(2-Oxooxolan-3-ylidene)hydrazinyl]phenyl]sulfonylguanidine			0.429	0.000776	0.026
act	789554	;3-chloro-6-(3-(ethylamino)propyl)-9-methoxy-5H-pyrido[3...	NA	NA	0.432	0.000785	0.0262
act	645323		NA	NA	0.464	0.000789	0.0263
act	713591	Tribenzyl (2S,6S,10S)-4,8,12-trioxo-1,5,9-triazacyclododecane-2,6,10-tricarboxylate			0.451	0.000794	0.0265
act	378695	6H-Pyrido[4,3-b]carbazolium, 11-[1-O-[(.alpha.-L- lyxofu...			0.477	0.000795	0.0265
act	660028	4-[(5S,8Ar)-5-anilino-5,5a,6,8,8a,9-hexahydro-[2]benzofuro[6,5-f][1,3]benzodioxol-9-yl]-2,6-dimethoxyphenol			0.482	0.000801	0.0266
act	641210		NA	NA	0.462	0.000821	0.0272
act	740972	6-(3-chloropropyl)-5,6-dihydro-9-methoxycarbonyl-3-nitro...			0.43	0.000834	0.0277
act	83142	Daunorubicin	TOP2	FDA approved	0.423	0.000841	0.0278
act	172774	acridinium, 3-amino-9-[[4-[[[4-[(aminoiminomethyl)amino]...			0.43	0.000849	0.0281
act	529180	ara-fc	NA	NA	0.484	0.000868	0.0286
act	737342	6-(3-Azidopropyl)-5,6-dihydro-2,3,9-trimethoxy-5,11-diox...			0.444	0.000875	0.0288
act	320846	Batracylin	TOP2|TOP1	Clinical trial	0.422	0.000877	0.0289
act	701599	[5-(5-Fluoro-2,4-dioxopyrimidin-1-yl)-2-[[[5-[4-(hexadecanoylamino)-2-oxopyrimidin-1-yl]oxolan-2-yl]methoxy-hydroxyphosphoryl]oxymethyl]oxolan-3-yl] acetate			0.422	0.000879	0.0289
act	54848	1-[N'-[3-[(6-Methoxyquinolin-8-yl)amino]propyl]carbamimidoyl]-2-propan-2-ylguanidine;hydrochloride			-0.425	0.000882	0.0289
act	61586	phleomycin (8ci 9ci)	NA	NA	0.478	0.000886	0.029
act	725666	6-[(5-Morpholyl-3-aminoethyl)-1-propyl]-5,6-dihydro-2,3-...			0.428	0.000887	0.029
act	359079	Rebeccamycin	NA	NA	0.421	0.000897	0.0293
act	307241	Adriamycin deriv., mixt. with hydroxyethyl starch (cross...	NA	NA	0.424	0.000907	0.0296
act	630702	Amioxazole			0.504	0.000912	0.0297
act	709975	[2-Oxo-1-phenyl-2-[(5-phenyl-1,3,4-oxadiazol-2-yl)amino]ethyl] piperidine-1-carbodithioate			0.434	0.000923	0.03
act	649044	2-Hydroxy-7-methoxy-4-methyl-2,4,6-cycloheptatrien-1-one			0.472	0.00093	0.0302
act	781522	3-fluoro-6-((2S,3S,4R)-2,3,4,5-tetrahydroxypentyl)-5H-[1...	NA	NA	0.43	0.000931	0.0302
act	409962	Carmustine	A7|AlkAg	FDA approved	0.42	0.000942	0.0305
act	640322	[(Aminomethyl)(2-aminoethyl)dimethylsilane] platinum(IV)...	NA	NA	0.422	0.000979	0.0317
act	1013	7-(.ALPHA.-ANILINO-P-NITROBENZYL)-8-QUINOLINOL			0.418	0.000989	0.032
act	689133	1H,3H-Benzo[c]pyrrolo[3,4-a]carbazole-1,3-dione, 2,3a,3b...			0.439	0.00101	0.0326
act	726332	6-[3-((2,2-Dimethoxyethylamino)-1-propyl)]-5,6-dihydro-2...			0.435	0.00101	0.0326
act	658094	[3-[1,2-Bis(propan-2-ylcarbamoyloxymethyl)-6,7-dihydro-5H-pyrrolizin-3-yl]pyridin-1-ium-1-yl]methyl 2-phenylacetate;iodide			0.416	0.00104	0.0335
act	689868	1-(4-Methoxy-6-nitroacridin-9-yl)-2-(4-chlorophenyl)hydrazine			0.43	0.00105	0.0337
act	658247	Pyridine-3,5-dicarboxylic acid, 1,4-dihydro-2,6-dimethyl...			0.416	0.00105	0.0337
act	688515	[6-[[(5S,8Ar,9R)-9-[3,5-dimethoxy-4-[2-(4-methylpiperazin-1-yl)acetyl]oxyphenyl]-8-oxo-5a,6,8a,9-tetrahydro-5H-[2]benzofuro[6,5-f][1,3]benzodioxol-5-yl]oxy]-2-methyl-7-[2-(4-methylpiperazin-1-yl)acety			0.433	0.00106	0.034
act	617567	Iron (1+), chloro[[2-hydroxybenzoic acid(2,6- pyridinedi...	NA	NA	0.419	0.00106	0.0339
act	162675	celsioside	NA	NA	0.422	0.00109	0.0349
act	791785	Sapacitabine	Ds	Clinical trial	0.421	0.0011	0.035
act	311153	9-hydroxy-2-(2-piperidinylethyl)ellipticinium acetate	NA	NA	0.414	0.00111	0.0354
act	697120		NA	NA	0.417	0.00113	0.0359
act	692758	4-(Hexyloxy)-N-hydroxy-N-methylbenzamide			0.413	0.00116	0.0368
act	712201	10-Amino-7-trimethylsilylethylcamptothecin			0.419	0.00117	0.0372
act	708298	AR-67	TOP1	Clinical trial	0.412	0.00118	0.0376
act	686562	3-(9H-Fluoren-9-yl)-1,5,2,4-dioxadithiepane 2,2,4,4-tetraoxide			0.415	0.00119	0.0376
act	782892		NA	NA	0.415	0.0012	0.038
act	201863	n-[1-(biphenyl-4-yl)ethyl]-3,4-dichlorobenzamide			0.422	0.00121	0.038
act	331269	Oxirane, 2,2'-[2,3-naphthalendiylbis(oxymethylene)]bis-			0.422	0.00121	0.038
act	790511	;3-fluoro-9-methoxy-6-(3-(piperazin-1-yl)propyl)-5H-pyri...	NA	NA	0.418	0.00121	0.038
act	24189	8455AB			0.415	0.00121	0.038
act	694265	STL338719			0.411	0.00121	0.038
act	687321		NA	NA	0.414	0.00125	0.0392
act	228082	Benzofurazan, 4-(4-morpholinyl)-7-nitro-, 3-oxide			0.413	0.00126	0.0396
act	408200		NA	NA	0.41	0.00126	0.0396
act	680827	5-Bromo-3H-triazolo[4,5-d]pyrimidin-7-ol			0.412	0.0013	0.0406
act	735424	2-(3-(hydroxymethyl)phenylamino)-6-(2,6-dichlorophenyl)-...			0.412	0.0013	0.0406
act	339705	5H-Indeno[1,2-c]isoquinoline-5,11(6H)-dione, 6-(2-hydrox...			0.409	0.0013	0.0406
act	653843	N'-(Cyano(4-hydroxyphenyl)methyl)-2-hydroxybenzohydrazide			0.464	0.00131	0.0408
act	797926		NA	NA	0.412	0.00131	0.0407
act	734872	5,6-Dihydro-6-(3-dimethylamino-1-propyl)-3-nitro-5,11-di...			0.425	0.00134	0.0415
act	89822	5-Amino-3-[4-hydroxy-5-(hydroxymethyl)oxolan-2-yl]-6H-triazolo[4,5-d]pyrimidin-7-one			0.411	0.00134	0.0415
act	628668	Ethyl 4-[[(5S,8aR)-9-(4-hydroxy-3,5-dimethoxyphenyl)-8-oxo-5a,6,8a,9-tetrahydro-5H-[2]benzofuro[5,6-f][1,3]benzodioxol-5-yl]amino]-2-hydroxybenzoate			0.459	0.00135	0.0418
act	736797	(3Z)-4-Chloro-3-[(3,4,5-trimethoxyphenyl)methylidene]-1H-indol-2-one			0.414	0.00135	0.0418
act	654509	pirarubicin hcl			0.408	0.00135	0.0418
act	674108	2-Acetylimidazo[4,5-b]pyridin 4 pyrrlidino 3 thiosemicar...			0.414	0.00136	0.042
act	653847	N'-(Cyano(2-hydroxy-1-naphthyl)methyl)-2-hydroxybenzohydrazide			0.41	0.00139	0.0429
act	793457	;NTD-185	NA	NA	0.444	0.0014	0.0429
act	350378	9H-Purin-6-amine, 9-(2-azido-2-deoxy-.beta.-D-arabinofur...	NA	NA	0.407	0.0014	0.0429
act	710416	[8-Methyl-7-(propan-2-ylcarbamoyloxymethyl)thieno[3,2-g]indol-6-yl]methyl N-propan-2-ylcarbamate			0.413	0.00142	0.0435
act	728857	6-(4-Trichloroacetyloxy-1-butyl)-5,6-dihydro-2,3-dimetho...			0.416	0.00143	0.0439
act	645808	10-[2-(Dimethylamino)ethylamino]-5-hydroxy-1,14-diazatetracyclo[7.6.1.02,7.013,16]hexadeca-2(7),3,5,9,11,13(16),14-heptaen-8-one;hydrochloride			0.406	0.00143	0.0439
act	58903	[[(3Z)-3-Amino-3-benzoyloxyimino-2-cyclohexylpropanoyl]amino] benzoate			0.409	0.00144	0.0439
act	797929		NA	NA	0.409	0.00144	0.0439
act	753975	prepyridomacrolidine a			0.409	0.00144	0.0439
act	635591	9-N-(N'-bis-chloroethyl-N-1,4-diaminobutyl)2-methoxyacri...			0.409	0.00145	0.0443
act	642293	N-[(5S,8Ar,9R)-9-(4-hydroxy-3,5-dimethoxyphenyl)-8-oxo-5a,6,8a,9-tetrahydro-5H-[2]benzofuro[5,6-f][1,3]benzodioxol-5-yl]-3-cyanobenzamide			0.447	0.00146	0.0444
act	700322	trichloro[?]triol			0.442	0.00146	0.0443
act	613467	Formamide, N-[2-(3-hydroxyphenyl)ethene-1-yl]-, (E)-			0.408	0.00146	0.0444
act	617960	N-[2-(Dimethylamino)ethyl]-7-hydroxyacridine-4-carboxamide;hydrochloride			0.465	0.00149	0.0452
act	692332	9-(3-Chloro-2-hydroxy-propyl)-1,3-dimethyl-purino[7,8-a]pyrimidine-2,4,8-trione			0.41	0.00152	0.0461
act	676194	7-Ethyl-10,11-methylenedioxy-20(S)-camptothecin-20-glyci...	NA	NA	0.403	0.00153	0.0463
act	185057	Acetic acid, phenoxy-, 6-[[(aminothioxomethyl)hydrazono]...			0.41	0.00154	0.0464
act	653842	N'-(Cyano(2-hydroxyphenyl)methyl)-2-hydroxybenzohydrazide			0.458	0.00155	0.0468
act	647939	N-(2-(3,4-Dimethoxyphenyl)ethyl)-3-(9H-fluoren-9-yl)-1-propanamine			-0.417	0.00155	0.0467
act	327182	L-Glutamic acid, N-[4-[[(2-amino-1,4-dihydro-4-oxo-6-qui...			0.432	0.00156	0.0468
act	740973	6-(3-azidopropyl)-5,6-dihydro-9-methoxycarbonyl-3-nitro-...			0.41	0.00156	0.0468
act	53292	Ethyl 2-[(2-acetamido-3-phenylpropanoyl)amino]-3-[4-[bis(2-chloroethyl)amino]phenyl]propanoate			0.416	0.00159	0.0477
act	683774	Diethyl 2-[[2-amino-3-[4-[bis(2-chloroethyl)amino]phenyl]propanoyl]amino]pentanedioate;2,2,2-trifluoroacetic acid			0.402	0.00159	0.0476
act	623794	1,4-Benzodioxin-2-carboxamide, 6-(4-oxo-4-H-1- benzopyra...			0.438	0.00162	0.0485
act	772563	ARRY-704	PK:MAP2K,MAP2K1,MAP2K2	Clinical trial	-0.408	0.00162	0.0485
act	668814	Kahalide F		Clinical trial	-0.434	0.00162	0.0484
act	681683	2-Trifluoroethoxy-6-hydroxyiminoestra-1,3,5(10)-trien-3,...	NA	NA	0.408	0.00163	0.0486
act	49520	o-Tolualdehyde, 4-(bis(2-chloroethyl)amino)-			0.401	0.00163	0.0485
act	631520	N-[(Z)-[4-(1,3-Benzothiazol-2-yl)-1-(2,6-dimethylphenyl)-2,5,6-trioxopiperidin-3-ylidene]amino]-2-hydroxybenzamide			0.438	0.00164	0.0489
act	281272	ara ac	NA	NA	0.401	0.00166	0.0494
act	734289	6-(3-Azidopropyl)-9-bromo-5,6-dihydro-3-nitro-5,11-dioxo...			0.421	0.0017	0.0504
act	675250	3-N,5-N-Bis[3-[2-chloroethyl(ethyl)amino]-5-[(dimethylamino)methyl]phenyl]-1-methylpyrazole-3,5-dicarboxamide;hydrochloride			0.41	0.0017	0.0503
act	697777	Ethyl 5-methyl-7-(methylthio)-4,5-dihydro-3H-1-thia-3,5,6,8-tetraazaacenaphthylene-2-carboxylate			0.428	0.00171	0.0506
act	658100	[4-[1,2-Bis(propan-2-ylcarbamoyloxymethyl)-6,7-dihydro-5H-pyrrolizin-3-yl]pyridin-1-ium-1-yl]methyl 3-methylbutanoate;iodide			0.4	0.00171	0.0506
act	714604	Purpureagitosid			0.4	0.00171	0.0506
act	658098	[4-[1,2-Bis(propan-2-ylcarbamoyloxymethyl)-6,7-dihydro-5H-pyrrolizin-3-yl]pyridin-1-ium-1-yl]methyl 2-methylpropanoate;iodide			0.399	0.00174	0.0513
act	67774	Diethyl(acetylamino)[(6-nitro-1h-indol-3-yl)methyl]propanedioate			0.416	0.00175	0.0514
act	626387		NA	NA	0.491	0.00176	0.0517
act	116789	Acovenoside B			0.405	0.00176	0.0517
act	603578	Platinum, tetrachloro[dimethylsilylenebis(methanamine)]-...	NA	NA	0.399	0.00176	0.0517
act	693335		NA	NA	0.401	0.00181	0.053
act	713196	2-[5-[5-(4,9-Dioxo-3a,9a-dihydro-1H-benzo[f]benzimidazol-2-yl)pentyldisulfanyl]pentyl]-3a,9a-dihydro-1H-benzo[f]benzimidazole-4,9-dione			0.43	0.00182	0.0533
act	653846	Benzoic acid, 2-hydroxy-, 2-[(3,4-dimethoxyphenyl)(cyano...			0.457	0.00183	0.0535
act	657304	Methanone, [1-ethyl-4-hydroxy-4-(4-hydroxyphenyl)-3-piperidinyl](4-hydroxyphenyl)-, hydrochloride			-0.415	0.00183	0.0535
act	642912	[5-[[2-Chloroethyl(nitroso)carbamoyl]amino]-3,4-dihydroxy-6-methoxyoxan-2-yl]methyl tetradecanoate			0.452	0.00184	0.0536
act	56591	1-[N'-[2-[(6-Methoxyquinolin-8-yl)amino]ethyl]carbamimidoyl]-2-propan-2-ylguanidine;hydrochloride			-0.404	0.00185	0.054
act	620256	6H-Pyrido[4,3-b]carbazolium, 9-hydroxy-2,5,11-trimethyl-...			0.4	0.00186	0.0542
act	627986	Benzo[g]pteridine-2,4(3H,10H)-dione, 10-(4-hydroxyphenyl)-3-methyl-			0.446	0.00189	0.0549
act	744622	4,8,13,17,21-pentamethyl-docosa-4,8,12,16,20-pentaenoic ...			0.399	0.00192	0.0556
act	697535	N-[1-(Chloromethyl)-3-(5,6,7-trimethoxy-1H-indole-2-carbonyl)-1,2-dihydrobenzo[e]indol-5-yl]-2-methyl-2-(2-nitrophenyl)propanamide			0.395	0.00195	0.0565
act	82151	Daunorubicin	TOP2	FDA approved	0.395	0.00195	0.0565
act	653013	2-Chloro-4-(3,4-dimethoxyphenyl)-1-((4-hydroxy-6-methyl-2-pyrimidinyl)amino)-3-azetidinone			0.469	0.00196	0.0567
act	645354	[Bis(aminomethyl)cyclobutamethylenesilane]tetrachloropla...	NA	NA	0.398	0.00197	0.057
act	711727	7-(Trifluoromethyl)-N-(3,4,5-trimethoxyphenyl)pyrrolo[1,2-a]quinoxalin-4-amine			0.427	0.00199	0.0575
act	79687	N-[(E)-[4-[Bis(2-chloroethyl)amino]phenyl]methylideneamino]-2-(7-hydroxy-2-oxochromen-4-yl)acetamide			0.401	0.002	0.0577
act	697715	6,7-Dimethyl-3-[4-(4-nitrophenyl)piperazin-1-yl]-1,4-dioxido-quinoxaline-1,4-diium-2-carbonitrile			0.408	0.00201	0.0577
act	791638		NA	NA	0.401	0.00201	0.0578
act	658396	N-(3-Aziridinylpropyl)-1,4-diaminobutane			0.394	0.00203	0.0581
act	682306	N-[p-[N-(2,4,7-triamino-6-pteriddinylmethyl)-N-methylami...			0.394	0.00203	0.0582
act	635832	LS-120557			0.447	0.00207	0.0591
act	657995	4H-Pyrazolo[3,4-d][1,3]thiazin-6-amine, 1-(2-hydroxybenz...			0.407	0.00207	0.0591
act	36405	Chelerythrine	BCL2|PK:PRKCA,STK	Clinical trial	0.433	0.00212	0.0605
act	759822	CLIOQUINOL	NA	NA	0.402	0.00212	0.0605
act	729352	2,3-Dimethoxy-5,6-dihydro-5,11-diketo-6-(9H-fluoren-9-yl...			0.406	0.00213	0.0605
act	1895	GUANAZOLE	A7		0.399	0.00213	0.0606
act	720354	4-[2-(4-Hydroxy-phenyl)-vinyl]-benzenesulfonamide			0.395	0.00213	0.0605
act	79037	Lomustine	A6|AlkAg	FDA approved	0.395	0.00213	0.0605
act	653841	N'-(Cyano(phenyl)methyl)-2-hydroxybenzohydrazide			0.446	0.00215	0.061
act	662305	Cyanoanilino-azatoxin			0.392	0.00216	0.061
act	47468	1-N',2-N'-Bis[(Z)-(4-hydroxyphenyl)methylideneamino]ethanediimidamide			0.398	0.00217	0.0615
act	180510	daunorubicineal	NA	NA	0.42	0.00218	0.0615
act	768068	Cobimetinib (isomer 1)	PK:MAP2K,MAP2K1	FDA approved	-0.397	0.00221	0.0623
act	117614	adoca	NA	NA	0.394	0.00222	0.0626
act	736401	N'-[2-(1,3-Benzoxazol-2-ylamino)-6-methylpyrimidin-4-yl]-2-hydroxybenzohydrazide			0.4	0.00224	0.0631
act	678914	4-Acridinecarboxamide, N-[2-(dimethylamino)ethyl]- 1-met...			0.39	0.00225	0.0633
act	704319	(E)-2-[4-Amino-6-(3,5,5-trimethyl-4H-pyrazol-1-yl)-1,3,5-triazin-2-yl]-3-[1-(3,5-dichlorophenyl)pyrrol-2-yl]prop-2-enenitrile			0.396	0.00226	0.0635
act	689529	N'-(2-Hydroxy-5-methoxybenzylidene)-1-piperidinecarbothiohydrazide			0.393	0.00226	0.0634
act	73754	Fluorodopan	A7		0.39	0.00228	0.0638
act	679743	1,4,7,10,13,16-Hexaoxacyclooctadecane-2,9-dione, 12-[4-h...			0.399	0.00229	0.0642
act	671043	2-ethoxyestra-1,3,5-trien-3,17.beta.-diol			0.396	0.0023	0.0643
act	690271	antineoplastic-690271			0.389	0.0023	0.0642
act	645678	S-Phenyl (E)-3-[4-[bis(2-cyanoethyl)amino]-2-methylphenyl]-2-[[(E)-3-phenylprop-2-enoyl]amino]-3-phenylsulfanylprop-2-enethioate			0.425	0.00234	0.0652
act	685862	Diethyl 1,6-dihydropyrrolo[2,3-e]indole-2,7-dicarboxylate			0.402	0.00234	0.0652
act	637441	Ethyl (4Z)-2-(4-bromoanilino)-4-[(2-hydroxybenzoyl)hydrazono]furan-3-carboxylate			0.429	0.00235	0.0655
act	740504	5,6-dihydro-6-[3-(2-hydroxyethyl)amino-1-propyl]-3-nitro...			0.392	0.00236	0.0656
act	741296	2-Amino-9-chloro-3,5-bis(4-chlorophenyl)pyrimido[4,5-c]quinolin-1-one			0.395	0.00238	0.0661
act	648270		NA	NA	-0.401	0.00238	0.0661
act	667456	2-Phenyl-4H-1,4-benzothiazine-3-thione			0.404	0.00242	0.067
act	342979	1-((2-(Dimethylamino)ethyl)amino)-7-hydroxy-4-methyl-9H-xanthen-9-one			0.388	0.00242	0.067
act	679265	N-[2,4-Dinitro-1-anilino]-3-nitro-1,8-naphthalimide			0.39	0.00245	0.0676
act	717823	Indirubin derivative, 8			0.39	0.00246	0.0678
act	4184	p,p'-Dihydroxystilbene			0.397	0.00247	0.0681
act	682352	3,4-Dihydroxy-2-methyl-3,4-bis(p-tolyl)isoquinolin-1-one			0.397	0.00248	0.0682
act	753376	3-[4-(1h-indol-3-yl)-1,3-thiazol-2-yl]-1-methyl-1h-indole			-0.393	0.00248	0.0683
act	758248	RO-5126766	GTPase|PK:STK,YK,MAP2K,RAF,MAP2K1,MAP2K2	Clinical trial	-0.39	0.0025	0.0687
act	624414	4-Amino-N-[(Z)-1-(6,11-dioxo-3H-naphtho[2,3-e]benzimidazol-2-yl)-2-(3-nitrophenyl)ethenyl]benzamide			0.449	0.00251	0.0688
act	697189	NCIChal_000048			0.386	0.00251	0.0689
act	679266	N-[4-Ethyl-2,6-piperidinedione)phenyl]-3-nitro-1,8-napht...			0.396	0.00254	0.0694
act	723392	12-(2-Aminoethylamino)-8,14-diazatetracyclo[7.7.1.02,7.013,17]heptadeca-1(17),2,4,6,8,11,13,15-octaen-10-one;2,2,2-trifluoroacetic acid			0.392	0.00254	0.0694
act	201290	Cytosine, 1.beta.-D-arabinofuranosyl-N(sup 4)-stearoyl-			0.386	0.00255	0.0695
act	650362	4-(4-Methoxyphenyl)-4,22-diazapentacyclo[13.7.0.02,6.07,14.016,21]docosa-1(15),16,18,20-tetraene-3,5-dione			0.426	0.00256	0.0699
act	628497	9-N(N'-bis-chloroethyl-N'-1,2-diamino ethyl) 2-methoxy a...			0.448	0.00257	0.0699
act	734604	1-phenyl-5-(4-(trifluoromethyl)phenyl)-1H-imidazole			0.392	0.00258	0.0702
act	642911	[5-[[2-Chloroethyl(nitroso)carbamoyl]amino]-3,4-dihydroxy-6-methoxyoxan-2-yl]methyl dodecanoate			0.438	0.00259	0.0704
act	742410	5- fluoro-2'-deoxyuridyly-(3'->5')-3'-c-ethynylcytosine			0.388	0.00259	0.0704
act	674184		NA	NA	0.388	0.00261	0.0708
act	718809	(3S,8R,9S,10R,13S,14S,16E,17S)-10,13-Dimethyl-16-(pyridin-3-ylmethylidene)-1,2,3,4,7,8,9,11,12,14,15,17-dodecahydrocyclopenta[a]phenanthrene-3,17-diol			0.421	0.00262	0.0711
act	710392	4,5,5',6'-Tetrabenzoylspiro[1,3-dithiole-2,7'-dithiolo[4,3-b]thiopyran]-3'-one			0.388	0.00263	0.0711
act	732937	6-(3-Azidopropyl)-5,6-dihydro-2,3-dimethoxy-5,11-dioxo-1...			0.429	0.00264	0.0713
act	378734	from cephalodiscus gilchristi			0.412	0.00265	0.0715
act	638441		NA	NA	0.424	0.0027	0.0728
act	728854	5,6-Dihydro-6-(3-guanidinyl-1-propyl)-5,11-dioxo-11H-ind...			0.411	0.00271	0.0729
act	736916	Ethyl 8-[(2,4-dichlorophenyl)methyl]-5-[(dimethylamino)methyl]-4-hydroxy-7-methyl-3H-pyrrolo[2,3-e]benzimidazole-6-carboxylate;hydrochloride			0.408	0.00271	0.0729
act	701022	6-Amino-13-(4-chlorophenyl)-11-oxo-3,4,7,8,10-pentazatricyclo[7.4.0.02,7]trideca-1,3,5,8,12-pentaene-5,12-dicarbonitrile			0.387	0.00272	0.0731
act	135688		NA	NA	0.432	0.00273	0.0732
act	740564	6-(3-aminopropyl)-9-fluoro-5,6-dihydro-2,3-dimethoxy-5,1...			0.386	0.00274	0.0734
act	143095	Pyrazofurin	Ds|Rs		0.383	0.00276	0.074
act	680185	Estra-1,3,5(10)-trien-3,17-diol,2-ethoxy-6-(hydroxyimino...	NA	NA	0.395	0.0028	0.0751
act	635157	Dichlorobisoxinatotitanium(IV)	NA	NA	-0.435	0.00284	0.076
act	665936	(5S,5As,8aR,9R)-9-(4-hydroxy-3,5-dimethoxyphenyl)-5-[2-(2-hydroxyethylamino)ethylamino]-5a,6,8a,9-tetrahydro-5H-[2]benzofuro[6,5-f][1,3]benzodioxol-8-one;hydrochloride			0.391	0.00285	0.0761
act	98573	2-Hydroxynaphthalene-1-carbaldehyde (2-pyridyl)hydrazone			0.388	0.00285	0.076
act	114341	Caerulomycin			0.381	0.00288	0.0768
act	727356	6-(4-Amino-1-butyl)-5,6-dihydro-2,3-dimethoxy-8,9-methyl...			0.384	0.00292	0.0775
act	684440	2-Amino-N-[2-[[4-[2-[(2-amino-4-methylsulfanylbutanoyl)amino]ethylamino]-9,10-dioxoanthracen-1-yl]amino]ethyl]-4-methylsulfanylbutanamide			0.381	0.00292	0.0775
act	378901	4'-i-adriamycin			0.429	0.00293	0.0778
act	617958	4-Acridinecarboxamide, N-[2-(dimethylamino)ethyl]-5- met...			0.42	0.00293	0.0777
act	32190	WLN: T66 BNJ G1R& JQ	NA	NA	0.384	0.00294	0.078
act	720438	1-[5-(3,3-Dimethyl-2-oxobutyl)-2,4,5-trihydroxyfuran-2-yl]-3,3-dimethylbutan-2-one			0.39	0.00295	0.078
act	668380	nitrophenyl-azatoxin			0.38	0.00297	0.0784
act	706013	(5Z,13E)-8-(4-Chlorophenyl)-5,13-bis[(4-chlorophenyl)methylidene]-11-ethyl-4-thia-2,7,11-triazatricyclo[7.4.0.03,7]trideca-1(9),2-dien-6-one			0.393	0.00298	0.0787
act	153175	cyclohexanecarboxylic acid, 4-[[[(2-chloroethyl)nitrosoa...	NA	NA	0.442	0.003	0.0791
act	116787	venenatine	NA	NA	0.383	0.00302	0.0795
act	95381	DNZGBFXOVKCJMO-UHFFFAOYSA-N			0.386	0.00303	0.0798
act	715841	N-Benzyl-5,6-dihydro-2,3-dimethoxy-5,11-oxo-11H-indeno~[...			0.386	0.00303	0.0798
act	33762	LS-130969			0.382	0.00306	0.0803
act	123977	Sarnovid	NA	NA	0.382	0.00307	0.0805
act	651858	1-[3-[[(5S,8Ar)-9-(4-hydroxy-3,5-dimethoxyphenyl)-8-oxo-5a,6,8a,9-tetrahydro-5H-[2]benzofuro[6,5-f][1,3]benzodioxol-5-yl]amino]propyl]pyrrolidin-2-one			0.426	0.00312	0.0817
act	768025		NA	NA	-0.385	0.00312	0.0817
act	761906	17e-(4-(bis(2-chloroethyl)amino)benzoyloxyimino)-5-andro...	NA	NA	0.381	0.00317	0.083
act	674704	1,3-Benzothiazol-2-yl 1-benzyl-3-methyl-2-butenyl sulfone			0.378	0.00318	0.083
act	678088		NA	NA	0.387	0.0032	0.0834
act	49488	N,N'-Bis[(Z)-(2-hydroxyphenyl)methylideneamino]decanediamide			0.38	0.00322	0.0838
act	732298	4,7-epoxyisobenzofuran-1(3h)-one, hexahydro-3-hydroxy-, ...			-0.38	0.00323	0.084
act	681081	AK155881			0.377	0.00324	0.0842
act	783099		NA	NA	0.38	0.00325	0.0845
act	681758	1H-Pyrrole-3,3,4-tricarbonitrile, 5-amino-2,3-dihydro- 1...			0.39	0.00326	0.0846
act	789549	;3-chloro-9-methoxy-6-(3-(piperazin-1-yl)propyl)-5H-pyri...	NA	NA	0.383	0.00327	0.0848
act	742036	Methyl 6-[bis-(4-methylphenyl)sulfonylamino]-7-methoxy-12-oxo-3,13,23-triazahexacyclo[11.10.1.02,11.04,9.014,19.020,24]tetracosa-1(24),2(11),3,5,7,9,14,16,18,20,22-undecaene-22-carboxylate			0.404	0.00328	0.0848
act	774790		NA	NA	-0.39	0.00328	0.0848
act	607301	L-Glutamic acid, N-[4-[[(2,4-diamino-6-pteridinyl) methy...			0.383	0.00331	0.0853
act	637994	6H-Imidazo[4,5,1-de]acridin-6-one, 5-[[3-(diethylamino) ...			0.379	0.00331	0.0853
act	711142	3-(2-Chlorophenyl)-2-(2-hydroxybenzoyl)-5-methyl-N-phenyl-3,4-dihydropyrazole-4-carboxamide			0.379	0.00331	0.0853
act	164011	Rubidazone	TOP2		0.376	0.00331	0.0853
act	797771	ulixertinib	PK:ERK	Clinical trial	-0.386	0.00332	0.0855
act	726972	6-[(3-Trifluoroacetyl)oxy-1-propyl]-5,6-dihydro-2,3-dime...			0.382	0.00335	0.0859
act	689138	1H,3H-Benzo[c]pyrrolo[3,4-a]carbazole-1,3-dione, 2,3a,3b...			0.376	0.00335	0.0859
act	651853	Sodium;4-[[(5S,8aR)-9-(4-hydroxy-3,5-dimethoxyphenyl)-8-oxo-5a,6,8a,9-tetrahydro-5H-[2]benzofuro[5,6-f][1,3]benzodioxol-5-yl]amino]benzoic acid			0.419	0.00336	0.0861
act	688978	Perylene-4,9-dione, 5,8-dihydroxy-1,3,10,12-tetramethoxy...			0.379	0.00337	0.0864
act	701744	1,3-Bis[5-[5-amino-1-(chloromethyl)1,2-dihydrobenzo[e]indole-3-carbonyl]-2-methyl-pyrazol-3-yl]urea			0.399	0.00338	0.0864
act	753616	(e)-1-(6-hydroxy-4-methoxybenzofuran-5-yl)-3-(2-methoxyp...			0.39	0.00353	0.0901
act	708240	Cbz-[Lys3]-Didemnin B			-0.38	0.00357	0.0912
act	783510	12,13-Diallyl-6-hydroxy-12,13-dihydro-5H-indolo[2,3-a]py...	NA	NA	0.376	0.0036	0.0918
act	692759	4-((3-Chlorobenzyl)oxy)-N-hydroxy-N-methylbenzamide			0.376	0.00362	0.0921
act	781517	3-fluoro-6-(3-((2-hydroxyethyl)amino)propyl)-5H-[1,3]dio...	NA	NA	0.382	0.00363	0.0924
act	617581	ARONIS017955			0.434	0.00364	0.0924
act	678063	Pyridine-3,5-dicarbonitrile, 6-amino- 1-(.beta.-D-glucop...			0.379	0.00364	0.0924
act	755384	Pemetrexed	Df|AM|GARTF|DHFR	FDA approved	0.376	0.00365	0.0927
act	633781	Lovastatin	NA	NA	0.416	0.00366	0.0927
act	767593	reshimunne	NA	NA	0.379	0.00366	0.0927
act	734905	6-(3-Azido-propyl)-2,3-dimethoxy-5,11-dioxo-5,11-dihydro...			0.385	0.00367	0.0928
act	90810	2-(4-Methylphenyl)-5-(2-naphthyl)-1,3,4-oxadiazole			0.372	0.00368	0.0929
act	81048	7-Chloro-6-methoxyquinoline-5,8-dione			0.372	0.0037	0.0932
act	166237	ethanol, 2,2'-[[3-methyl-4-[[[4-(2-methyl-4-thiazolyl)ph...			0.382	0.00371	0.0936
act	703202	Cartilagineol			-0.372	0.00372	0.0936
act	642523	4-Hydroxy-3-[(4-hydroxy-2-oxo-1-phenyl-3-quinolyl)-(4-nitrophenyl)methyl]-1-phenyl-quinolin-2-one			0.443	0.00374	0.094
act	758246	Trametinib	PK:STK,MAP2K,MAP2K1,MAP2K2	FDA approved	-0.375	0.00374	0.094
act	642283	(5S,8Ar,9R)-5-[(2-fluorophenyl)methylamino]-9-(4-hydroxy-3,5-dimethoxyphenyl)-5a,6,8a,9-tetrahydro-5H-[2]benzofuro[6,5-f][1,3]benzodioxol-8-one			0.411	0.00375	0.094
act	221265	Benzoic acid, 3-nitro-, [[1-[4-[(3-amino-2,3,6-trideoxy-...			0.375	0.00375	0.094
act	53861	1-[N'-[4-[(6-Methoxyquinolin-8-yl)amino]butyl]carbamimidoyl]-2-propan-2-ylguanidine;hydrochloride			-0.374	0.00385	0.0963
act	720308	Fusion protein 59 (FP59) plus Protective Antigen (PA)at ...	NA	NA	0.397	0.00388	0.0971
act	364432	SarCNU			0.386	0.00392	0.0978
act	748383	[1-(4-Chlorophenyl)-4-hydroxypyrazol-3-yl]-(3-methyl-4,5-dihydrobenzo[g]indazol-2-yl)methanone			0.373	0.00392	0.0978
act	771562		NA	NA	-0.379	0.00393	0.0981
act	759614	6-Mercaptopurine	Ds|PPAT	FDA approved	0.379	0.00397	0.0989
act	286628	5,12-Naphthacenedione, 8-acetyl-10-[(3-amino-2,3,6-tride...	NA	NA	0.376	0.00398	0.099
act	638404	(Z)3,4,5-Trimethoxy-4'-ethoxystilbene			0.408	0.00399	0.0993
act	333054	Pirarubicin Hydrochloride			0.416	0.004	0.0993
act	698095	9-Butyl-7-hydroxy-6-methyl-5-propan-2-yloxy-3-oxa-1-azatricyclo[6.3.1.04,12]dodeca-4,6,8(12),10-tetraen-2-one			0.372	0.00401	0.0995
act	700320	tritert-butyl[?]triol			0.4	0.00402	0.0997
act	629266	9-N-(N'-Bis-chloroethyl-N-1,6-diaminohexyl)-2- methoxyac...	NA	NA	0.375	0.00403	0.0998
act	3424	quinacrine mustard	NA	NA	0.403	0.00406	0.1
act	156939	Lomondomycin			0.372	0.00407	0.1
act	768023		NA	NA	-0.378	0.00408	0.101
act	704783	RT-014053			0.371	0.00409	0.101
act	720336	Methyl 2-hydroxy-5-methyl-6,11-dioxo-6,11-dihydro-5h-benzo[b]carbazole-1-carboxylate			0.371	0.00409	0.101
act	742035	Methyl 1-[7-[bis-(4-methylphenyl)sulfonylamino]-3-(hydroxymethyl)-6-methoxyquinolin-2-yl]-9H-pyrido[3,4-b]indole-3-carboxylate			0.378	0.00411	0.101
act	645356	[Bis(aminomethyl)cyclopentamethylenesilane]tetrachloropl...	NA	NA	0.371	0.00413	0.102
act	267707	Cedronine	NA	NA	0.377	0.00416	0.102
act	764659	SCH-900776	PK:STK,CHEK,CHEK1	Clinical trial	0.377	0.00416	0.102
act	657676	[(Z)-[4-(2,4-Dichloroanilino)-2-oxo-1-naphthylidene]amino]thiourea			0.395	0.00417	0.102
act	689131	4-(4-Methoxyphenyl)-9-phenyl-4,20-diazapentacyclo[11.7.0.02,6.07,12.014,19]icosa-1(13),14,16,18-tetraene-3,5-dione			0.371	0.00417	0.102
act	793461	;NTD-192	NA	NA	0.377	0.0042	0.103
act	673137	2-(7-(Acetyloxy)-2-oxo-2H-chromen-3-yl)phenyl acetate			0.394	0.00421	0.103
act	724058	3-[(N,N-Dimethylamino)-1-propyl]-5,6-dihydro-2,3-dimetho...			0.373	0.00423	0.103
act	788646	;2-((bis(pyridin-2-ylmethyl)amino)methyl)	NA	NA	0.37	0.00423	0.103
act	663315	Bis(2-chloroethyl)-N-methyl-N-(5-methoxy-2-nitrobenzyl) ...			0.373	0.00424	0.103
act	754582	3-[(2e,4e)-4,6-dimethyl-1-oxo-2,4-octadien-1-yl]-1,4-dih...	NA	NA	0.37	0.00426	0.104
act	698978	N-Benzyl-2-(9-bromoindolo[3,2-b]quinoxalin-6-yl)acetamide			0.379	0.00427	0.104
act	14666	adenin	NA	NA	0.414	0.00428	0.104
act	617585	Cobalt(2+);2,4-dibromo-6-[(E)-[(2-hydroxybenzoyl)hydrazinylidene]methyl]phenolate			0.418	0.00431	0.104
act	666767	2,5-Bis-(3,4-dihydroxy-benzylidene)-cyclopentanone			0.366	0.00433	0.105
act	128280	Aracytidine 5'-O-phenylphosphate			0.413	0.00434	0.105
act	659608	[[5-[(4-Bromophenyl)diazenyl]-2-hydroxyphenyl]-[2-[3-(2-chloroanilino)-3-oxopropanoyl]hydrazinyl]methyl]phosphonous acid			0.366	0.00434	0.105
act	4681	2-[4-(Carboxymethoxy)phenoxy]acetic acid			0.369	0.00436	0.105
act	49490	N,N'-Bis[(Z)-(5-chloro-2-hydroxyphenyl)methylideneamino]decanediamide			0.369	0.00436	0.105
act	736681	6-(3-Bromopropyl)-5,6-dihydro-3-nitro-5,11-dioxo-9-sulfo...			0.372	0.00438	0.106
act	357826	Thapsuine A			0.375	0.00439	0.106
act	726267	4-[6-(4-Fluoro-3-phenoxyphenyl)-[1,2,4]triazolo[3,4-b][1,3,4]thiadiazol-3-yl]phenol			0.375	0.0044	0.106
act	626715	10-EdAM			0.381	0.00445	0.107
act	624401	2-Hydroxy-3-[(8-hydroxyquinolin-7-yl)-(4-methoxyphenyl)methyl]-6-propan-2-ylcyclohepta-2,4,6-trien-1-one			0.43	0.00449	0.108
act	329488	Sellowin A			0.368	0.00449	0.108
act	700447	2-(3-(8-(6-(2-Hydroxyphenyl)[1,2,4]triazolo[3,4-b][1,3,4]thiadiazol-3-yl)octyl)[1,2,4]triazolo[3,4-b][1,3,4]thiadiazol-6-yl)phenol			0.365	0.00449	0.108
act	703203	mailione			-0.365	0.00451	0.108
act	782957	N-[2-(morpholin-4-yl)ethyl]-L-olivosyl-AF (2N)	NA	NA	0.368	0.00453	0.108
act	659947	7-O-[3-O-93-Amino-2,3,6-trideoxy-.alpha.-L.lyxo-hexopyra...			0.415	0.00457	0.109
act	713672	3-[6,13-Dichloro-3-[2-(2-hydroxyphenyl)-4-oxo-1,3-thiazolidin-3-yl]-[1,4]benzoxazino[2,3-b]phenoxazin-10-yl]-2-(2-hydroxyphenyl)-1,3-thiazolidin-4-one			0.391	0.00457	0.109
act	701075	2-Imino-N-phenyl-8-prop-2-enylchromene-3-carboxamide			-0.377	0.00458	0.109
act	694266	NCIChal_000043			0.364	0.00459	0.109
act	328784	1-Piperazinecarboselenoic acid, 4-(2-pyridinyl)-, [1-(2-...	NA	NA	-0.367	0.00459	0.109
act	620327	Carbonimidodithioic acid, [5-(4-nitrophenyl)-1,3,4- thia...			0.37	0.00466	0.111
act	275647	5,12-Naphthacenedione, 10-[(3-amino-2,3,6-trideoxy-.alph...	NA	NA	0.37	0.00467	0.111
act	716199	4-Acetamido-2-ethoxy-N-(2-oxo-3-phenoxy-4-phenylazetidin-1-yl)benzamide			0.379	0.00469	0.111
act	743265	Z223639760			0.376	0.00471	0.111
act	294608	G9SUZ33DVO			0.418	0.00475	0.112
act	645355	[Bis(aminomethyl)cyclopentamethylenesilane]dichloroplati...	NA	NA	0.366	0.00476	0.113
act	635544	(2E)-2-Hydroxyimino-4-(3-methyl-4-oxido-1-oxoquinoxalin-1-ium-2-yl)-4-oxo-N-(2,4,5-trichlorophenyl)butanamide			-0.397	0.00476	0.113
act	228099	wln: t56 bnonj bo fnw i- at6n dntj dr d1			0.378	0.00477	0.113
act	683403	[2-(Cyclohexylcarbamoyloxymethyl)-1-methyl-benzo[g]indol-3-yl]methyl N-cyclohexylcarbamate			0.378	0.00478	0.113
act	678102	5-hydroxy-3,7-dimethoxy-3',4'-methylenedioxyflavone			0.368	0.00484	0.114
act	756694	ciclopirox olamine (usan)	NA	NA	0.378	0.00485	0.114
act	372547		NA	NA	0.365	0.00486	0.114
act	638315		NA	NA	0.396	0.00489	0.115
act	154652	(E)-2,4-Diphenylbut-3-enoic acid			0.378	0.00489	0.115
act	606174	10,11-Methylenedioxy-20(RS)-camptothecin			0.365	0.00489	0.115
act	667640	Acetic acid;2-[[3-carboxy-3-[[4-[(2,4-diaminopteridin-6-yl)methylamino]benzoyl]amino]propyl]carbamoyl]benzoic acid			0.364	0.00491	0.115
act	691252	2-[(9-Amino-5-methylacridine-4-carbonyl)amino]ethyl-dimethyl-[(3-methyl-5-nitroimidazol-4-yl)methyl]azanium;chloride			0.364	0.00494	0.116
act	648154		NA	NA	0.403	0.00496	0.116
act	627897	1-[4-[(10-Oxidoacridin-10-ium-9-yl)methylamino]phenyl]sulfonylguanidine			0.403	0.00496	0.116
act	121879	N,N-Bis(2-chloroethyl)-3-methyl-4-(naphthalen-2-yliminomethyl)aniline;hydrochloride			0.367	0.00497	0.116
act	674103	2-Acetylimidazo[4,5-b]pyridin 4 p-chlorophenyl 3 thiosem...			0.364	0.00497	0.116
act	693117	15-[2-(Dimethylamino)ethyl]-10-[2-(dimethylamino)ethylamino]-1,15-diazatetracyclo[7.7.1.02,7.013,17]heptadeca-2,4,6,9,11,13(17)-hexaene-8,14,16-trione			0.364	0.00498	0.116
act	652893	Cyclovalone			0.361	0.00499	0.116
act	645353	[Bis(aminomethyl)cyclobutamethylenesilane]dichloroplatin...	NA	NA	0.361	0.005	0.116
act	239400	14-Morpholinodaunomycin monohydrochloride			0.407	0.00504	0.117
act	645829	5-Hydroxy-10-[2-(2-hydroxyethylamino)ethylamino]-1,14,15-triazatetracyclo[7.6.1.02,7.013,16]hexadeca-2(7),3,5,9,11,13(16),14-heptaen-8-one			0.394	0.00505	0.117
act	670995	(Z)-3-[[(4Z)-4-(5,5-Dimethyl-4-methyliminofuran-2-yl)imino-5,5-dimethylfuran-2-yl]amino]-4-hydroxy-4-methylpent-2-enenitrile			0.363	0.00508	0.118
act	709562	N-(2,4-Dichlorophenyl)-9-methyl-11-oxo-8-oxa-10-azatricyclo[7.3.1.02,7]trideca-2,4,6-triene-12-carboxamide			0.386	0.0051	0.118
act	761215	TAK-733	PK:STK,MAP2K,MAP2K1,MAP2K2	Clinical trial	-0.363	0.00511	0.118
act	653006	2-Chloro-1-((4-hydroxy-6-methyl-2-pyrimidinyl)amino)-4-(2-hydroxyphenyl)-3-azetidinone			0.369	0.00512	0.118
act	707148	Odoroside H			0.369	0.00513	0.118
act	619029	Carzelesin	NA	NA	0.429	0.00514	0.119
act	64692		NA	NA	0.382	0.00517	0.119
act	642288	N-[(5S,8Ar,9R)-9-(4-hydroxy-3,5-dimethoxyphenyl)-8-oxo-5a,6,8a,9-tetrahydro-5H-[2]benzofuro[5,6-f][1,3]benzodioxol-5-yl]benzamide			0.397	0.00522	0.12
act	357703	5,12-Naphthacenedione, 8-acetyl-10-[[3-[bis(phenylmethyl...			0.423	0.00523	0.12
act	138783	Bendamustine	A2|A6|AlkAg	FDA approved	0.375	0.00523	0.12
act	741107	6-(3-aminopropyl)-9-cyano-5,6-dihydro-3-nitro-5,11-dioxo...			0.362	0.00523	0.12
act	88927	Ardisin			0.382	0.00525	0.12
act	638436		NA	NA	0.438	0.00531	0.121
act	618857	4-Piperidinone, 3,5-bis[[(4-methylthio)phenyl]methylene]...	NA	NA	0.371	0.00532	0.121
act	611372	4-Amino-1,2-dihydrobenz(cd)indol-2-one			0.361	0.00532	0.121
act	690119	LS-152969			-0.381	0.00532	0.121
act	95099	gitoxim	NA	NA	0.361	0.00533	0.121
act	696867	1H-1,4,7-Triazonine-1-acetic acid, 4-[(dihydroxyphosphor...			-0.358	0.00535	0.122
act	756717	DAUNORUBICIN	TOP2	FDA approved	0.361	0.00536	0.122
act	105023	rubiflavin			0.361	0.00536	0.122
act	88421	Crinamin	NA	NA	0.37	0.00537	0.122
act	695585	(4-Nitrophenyl)methyl N-[1-(chloromethyl)-3-(5,6,7-trimethoxy-1H-indole-2-carbonyl)-1,2-dihydrobenzo[e]indol-5-yl]carbamate			0.361	0.00537	0.122
act	690266	antineoplastic-690266			0.358	0.00538	0.122
act	740643	6-(3-azidopropyl)-9-ethoxy-5,6-dihydro-3-nitro-5,11-diox...			0.361	0.00539	0.122
act	84086	7-{[(2-Bromophenyl)amino](phenyl)methyl}quinolin-8-ol			0.37	0.00544	0.123
act	758670	TANNIC ACID			0.36	0.00546	0.123
act	742253	8-(4-amino-1-methylbutyl)-amino-4-methyl-5,6-dimethoxyqu...			-0.367	0.00546	0.123
act	781433		NA	NA	0.36	0.00547	0.123
act	299130	Ferrate(1-), [2-(pyridinylmethylene)hydrazinecarbothioam...			0.363	0.00551	0.124
act	701100	2H-1-Benzopyran-2-one, 6-chloro-3-[imidazo[1,2-a]pyridin...			0.36	0.00551	0.124
act	614644		NA	NA	0.407	0.00552	0.124
act	734625	6-[2-(Dimethylamino)ethylamino]-9-methoxyindeno[1,2-c]quinolin-11-one			0.376	0.00552	0.124
act	645727	Carbamothioic acid, 4-chloro-3-[(1-methylethoxy) iminome...			0.363	0.00556	0.125
act	725671	5,6-Dihydro-5,11-dioxo-6-(3-amino-1-propyl)-11H-indeno[1...			0.363	0.00556	0.125
act	747650	2,3-dimethoxy-5h-pyrido[3',2':4,5]pyrrolo[3,2-c]cinnoline			0.36	0.00558	0.125
act	41890	2,5-bis(chloromethyl)-p-xylene			0.359	0.0056	0.125
act	118218	Fludarabine	Ds|AM|Dr|STAT1	FDA approved	0.365	0.00562	0.126
act	333571	Benzoic acid, 3,4,5-trihydroxy-, phenyl ester			0.362	0.00562	0.126
act	693545	4-Acridinecarboxamide, 9-amino-N-[2-[(2-aminoethyl)amino...	NA	NA	0.356	0.00562	0.126
act	668599	4-(3-Methoxyphenyl)-9,16-dimethyl-4,20-diazapentacyclo[11.7.0.02,6.07,12.014,19]icosa-1(13),14(19),15,17-tetraene-3,5-dione			0.375	0.00563	0.126
act	716770	1-(4-Chlorophenyl)-3-[(Z)-[1-(morpholinomethyl)-5-nitro-2-oxo-indolin-3-ylidene]amino]thiourea			0.386	0.00565	0.126
act	791211		NA	NA	0.359	0.00565	0.126
act	625545	Phenazinomycin			0.415	0.00566	0.126
act	808790	AZD-0364	PK:ERK	Clinical trial	-0.359	0.00567	0.126
act	632573	Tris(1,3-diphenylpropane-1,3-dionata)gallium(III)			0.406	0.00568	0.126
act	637692	Ethyl (4Z)-4-[(2-hydroxybenzoyl)hydrazono]-2-(1-naphthylamino)-4,5-dihydrofuran-3-carboxylate			0.389	0.00569	0.126
act	703785	6-Benzothiazolol, 2-(4-amino-3-methylphenyl)-			0.362	0.00571	0.127
act	78572	wln: t66 bnj bo emq &gh	NA	NA	0.355	0.00574	0.127
act	713296	4-[(E)-[5-(2,4-Dichlorophenyl)furan-2-yl]methylideneamino]-2-[(4-methylpiperazin-1-yl)methyl]-5-phenyl-1,2,4-triazole-3-thione			0.385	0.00575	0.127
act	687305	4-(N-acetyl-N-ethylamino)isoquinoline-1-carboxaldehyde t...			0.355	0.00575	0.127
act	685230	3-chloromethyl-6-hydroxyamino-1-(methanesulfonyl)indoline			0.355	0.00576	0.127
act	39147	resactin a			0.385	0.00577	0.127
act	682817	7,10:11,14-Dietheno-28H-23,27-nitrilo-22H-dibenzo[b,p] [...			0.355	0.00579	0.128
act	617582	2,4-Dibromo-6-[(E)-[(2-hydroxybenzoyl)hydrazinylidene]methyl]phenolate;manganese(2+)			0.401	0.00581	0.128
act	701024	3,18-Diazaoctacyclo[18.11.1.02,19.04,17.05,14.07,12.024,32.026,31]dotriaconta-1(32),2,4(17),5(14),7,9,11,15,18,20,22,24,26,28,30-pentadecaene-6,13-dione			0.355	0.00584	0.129
act	37627	1,5-diphenoxyanthraquinone			0.361	0.00585	0.129
act	237020	Largomycin F-II	NA	NA	0.354	0.00594	0.13
act	720065	Vedelianin			0.354	0.00595	0.131
act	623951	15-[2-[2-(14,16-Dioxo-15-azatetracyclo[7.7.1.02,7.013,17]heptadeca-1(17),2,4,6,8,10,12-heptaen-15-yl)ethylamino]ethyl]-15-azatetracyclo[7.7.1.02,7.013,17]heptadeca-1(17),2,4,6,8,10,12-heptaene-14,16-d			0.404	0.00596	0.131
act	630357	N-[(E)-[6-(2,5-Dimethylanilino)-1-(4-hydroxyphenyl)-2-methyl-1,6-dioxohexan-3-ylidene]amino]-2-hydroxynaphthalene-1-carboxamide			0.395	0.00596	0.131
act	776015		NA	NA	0.37	0.00596	0.131
act	374898	Magon			0.395	0.00598	0.131
act	105348	2-(2-Chloro-4,5-dimethoxyphenyl)-1-(1H-indol-3-yl)ethanone			0.36	0.00598	0.131
act	655911	2,3-Dimethoxy-6,8-bis(methylsulfanyl)-1H-benzo[7]annulene-1,4,7-trione			0.399	0.00599	0.131
act	640884	Benzoic acid, 4-[(E)-(2-methylimidazo[1,2-a]pyridin-3-yl)azo]-, hydrazide			0.417	0.00605	0.132
act	674991		NA	NA	0.362	0.00607	0.132
act	135757	methanesulfonamide, n-[4-[(5-methyl-3-nitro-9-acridinyl)...			0.359	0.00607	0.132
act	670968	1-Methyl-3-[(E)-(6-methyl-2-pyridyl)methyleneamino]-1-[2-(2-pyridyl)ethyl]thiourea			0.356	0.00612	0.133
act	747652	2,3-dimethoxy-1-nitrosopyrido[3',2':4,5]pyrrolo[1,2-c][1...			0.356	0.00614	0.133
act	95448	1h-1,2,4-triazole, 3-(4-diazo-4h-imidazol-5-yl)-			0.371	0.00617	0.134
act	642292	N-[(5S,8Ar,9R)-9-(4-hydroxy-3,5-dimethoxyphenyl)-8-oxo-5a,6,8a,9-tetrahydro-5H-[2]benzofuro[5,6-f][1,3]benzodioxol-5-yl]-4-cyanobenzamide			0.39	0.00618	0.134
act	683917	AB01321011-02			-0.358	0.00624	0.135
act	72881	N-[(Z)-(2-Hydroxynaphthalen-1-yl)methylideneamino]cyclopropanecarboxamide			0.358	0.00626	0.135
act	34927	N-(2,3-Dimethoxy-6-nitroacridin-9-yl)-N',N'-diethyl-2-phenylbutane-1,4-diamine;chloride			-0.355	0.00626	0.135
act	626316		NA	NA	0.436	0.00627	0.135
act	677169	9-(2-(4-(((Amino(imino)methyl)amino)sulfonyl)phenyl)hydrazino)acridine			0.355	0.00627	0.135
act	705891	N-[4-(6-Methyl-3,7,12-triazatetracyclo[6.5.2.04,15.011,14]pentadeca-1(14),4(15),5,8,10,12-hexaen-3-yl)phenyl]methanesulfonamide;hydrochloride			0.364	0.0063	0.136
act	795315		NA	NA	0.358	0.0063	0.136
act	626097	4-[(4-Chlorophenyl)methoxy]-5-[(4-chlorophenyl)methoxymethyl]-2-(p-tolyl)tetrahydrofuran-3-ol			0.419	0.00634	0.136
act	4290	1-[2-(4-Nitrophenyl)-2-oxoethyl]-4-pentylpyridin-1-ium bromide			-0.37	0.00635	0.137
act	803410	LY-3214996	PK:ERK	Clinical trial	-0.354	0.00638	0.137
act	660029	(5S,8R,8Ar)-5-(4-fluoroanilino)-9-(4-hydroxy-3,5-dimethoxyphenyl)-5,5a,6,8,8a,9-hexahydro-[2]benzofuro[5,6-f][1,3]benzodioxol-8-ol			0.405	0.00643	0.138
act	269191	Thalphenine chloride			0.351	0.00643	0.138
act	622769	Pyrimidine-5,6-diamine, N(5),N(5')- (1,2-ethanediylidene...	NA	NA	0.384	0.00644	0.138
act	630698	Amchloroxazole			0.414	0.00646	0.138
act	175377	cyclohexaneacetic acid, 4-[[[(2-chloroethyl)nitrosoamino...	NA	NA	0.405	0.00646	0.138
act	728321	Bis-{(5,6-dihydro-5,11-diketo-11H-indeno[1,2-c]isoquinol...			0.363	0.00649	0.139
act	684913	stilbene, 4-hydroxy-4'-methoxy-, (z)-	NA	NA	0.35	0.00652	0.139
act	767287		PK:Not Available		0.362	0.00655	0.14
act	718738	11-(6'-Bromohexylidene)-5,6-dihydro-2,3-dimethoxy-6-meth...			0.362	0.00658	0.14
act	768585		NA	NA	0.356	0.00658	0.14
act	746134	(E,2Z)-2-[[4-(4-Chlorophenyl)-1,3-thiazol-2-yl]hydrazinylidene]-4-(furan-2-yl)but-3-enoic acid			0.356	0.00658	0.14
act	626390	5-Methyl-2-phenyl-3b,4,5,6,7,7a,12,12b-octahydrobenzo[c]pyrrolo[3,4-a]carbazole-1,3(2H,3aH)-dione			0.383	0.00659	0.14
act	725669	5,6-Dihydro-5,11-dioxo-6-(2-amino-1-ethyl)-11H-indeno[1,...			0.359	0.00663	0.141
act	697133		NA	NA	0.35	0.00664	0.141
act	647941	4-Hydroxy-2,2,7-trimethyl-3,4-dihydro-2H-pyrano[3,2-g]quinoline-5,10-dione			0.39	0.00666	0.141
act	688349	1-(2-Cyanoethyl)-1',3,3'-triphenyl[1,1'-ethylenebisurea]			0.358	0.00667	0.141
act	629867	STL264933			0.399	0.00668	0.141
act	617959	N-[2-(Dimethylamino)ethyl]-7-methoxyacridine-4-carboxamide;hydrochloride			0.403	0.0067	0.141
act	628670	(5S,8Ar)-9-(4-hydroxy-3,5-dimethoxyphenyl)-5-(3-nitroanilino)-5a,6,8a,9-tetrahydro-5H-[2]benzofuro[5,6-f][1,3]benzodioxol-8-one			0.394	0.0067	0.141
act	378736	from cephalodiscus gilchristi	NA	NA	0.375	0.0067	0.141
act	109128	16-(1-aziridinyl)-12,20-dioxopregnan-3-yl acetate			0.358	0.00672	0.142
act	677640	2,8-Bis(3,4,5-trimethoxyphenyl)pyrano[3,2-g]chromene-4,6-dione			0.349	0.00674	0.142
act	639831	Benzo[h][1]benzopyrano[5,4,3-cde][1]benzopyran-5,12-dion...	NA	NA	0.349	0.00674	0.142
act	363250	Benzo[c]phenanthridinium, 2,12-dihydroxy-3,8,9-trimethox...			0.361	0.00675	0.142
act	774901	AZD-2858	Wnt|PK:GSK3A	Clinical trial	0.352	0.00676	0.142
act	21548	dthyd	NA	NA	0.349	0.00678	0.142
act	754483		NA	NA	0.351	0.00685	0.144
act	645352	[Bis(aminomethyl)diethylsilane]tetrachloroplatinum (IV)	NA	NA	0.397	0.00686	0.144
act	789948	;Ikarugamycin	NA	NA	0.357	0.00687	0.144
act	759155	Doxorubicin	TOP2	FDA approved	0.351	0.00687	0.144
act	645260	8-((2-Bromo-4,5-dimethoxybenzylidene)amino)-2-naphthyl 3-(hydroxy(oxido)amino)benzenesulfonate			0.397	0.00688	0.144
act	753978	tenellin camphanic acid ester			0.354	0.00689	0.144
act	793726	CCT-245737	PK:CHEK1	Clinical trial	0.357	0.0069	0.144
act	667047	2-propenyl estradiol			0.351	0.00691	0.144
act	684036	N-Amino-N-[(E)-(5-nitro-1H-imidazol-4-yl)diazenyl]methanamine			0.36	0.00694	0.145
act	697125		NA	NA	0.351	0.00694	0.145
act	630700	Amiguanidine			0.42	0.00695	0.145
act	11624	Maybridge3_001738			0.366	0.00696	0.145
act	697887	XK-469	TOP2	Clinical trial	0.373	0.007	0.145
act	728317	Bis-{(5,6-dihydro-5,11-diketo-11H-indeno[1,2-c]isoquinol...			0.35	0.00702	0.146
act	624153		NA	NA	0.384	0.00704	0.146
act	800959	Ulixertinib	NA	NA	-0.35	0.00704	0.146
act	734926	Flavenochromane C			0.353	0.00709	0.147
act	304426	tallysomycin s10b	NA	NA	0.35	0.00711	0.147
act	742037	Methyl 10-oxo-3,13,23-triazahexacyclo[11.10.1.02,11.04,9.014,19.020,24]tetracosa-1(24),2(11),4,6,8,14,16,18,20,22-decaene-22-carboxylate			0.358	0.0072	0.149
act	796430		NA	NA	0.349	0.00721	0.149
act	744330	(2r,11as)-8- {2-[4-(2-{[(2r,11as)-2-fluoro-7-methoxy-5-o...			0.349	0.00721	0.149
act	678107	Ternatin	NA	NA	0.352	0.00722	0.149
act	711070	(3E)-4-Chloro-3-[(6-chloroimidazo[2,1-b][1,3]thiazol-5-yl)methylidene]-1H-indol-2-one			0.352	0.00723	0.149
act	692754	4-Hexoxybenzenecarbohydroxamic acid			0.346	0.00723	0.149
act	696259	1h-tetrazole-5-butanoic acid, alpha.-[[4-[[(1,4-dihydro-...			0.346	0.00724	0.149
act	715812	(3E,6E)-3-(2-Oxo-1H-indol-3-ylidene)-6-[(5-phenylmethoxypyridin-2-yl)methylidene]piperazine-2,5-dione			0.349	0.00728	0.149
act	665517	Quinazolin-4(3H)-one, 6,8-dibromo-2-methyl- 3-[2-(D-xylo...	NA	NA	0.349	0.00731	0.15
act	718163	4-Hydroxy-3-[(E)-[(E)-(2-hydroxyphenyl)methylidenehydrazinylidene]methyl]-5-methoxybenzaldehyde			0.364	0.00735	0.151
act	751286	wa007-00			0.348	0.00736	0.151
act	679285	indan-2-yl 2-diazoacetate			0.371	0.0074	0.151
act	7521	simeon	NA	NA	0.357	0.00742	0.152
act	256942	Epirubicin	TOP2	FDA approved	0.354	0.00742	0.152
act	740505	5,6-dihydro-9-methoxy-6-(3-morpholino-1-propyl)-3-nitro-...			0.348	0.00746	0.152
act	619378	1,3,5-Triazin-4-one, 4,5-dihydro-2-amino- 5-.beta.-D-ara...	NA	NA	0.345	0.00752	0.153
act	56633	2-[5-[(6-Methoxyquinolin-8-yl)amino]pentyl]guanidine;nitric acid			-0.347	0.00752	0.153
act	702363	(5E)-5-Benzylidene-3-pyridin-2-yl-2-(3,4,5-trimethoxyphenyl)-1,3-thiazolidin-4-one			0.363	0.00753	0.153
act	732661	6-(3-Chloropropyl)-5,6-dihydro-5,11-dioxo-11H-indeno[1,2...			0.374	0.00754	0.153
act	693563	N-[5-[(E)-3-[8-(Chloromethyl)-1-methyl-4-phenylmethoxy-7,8-dihydro-3H-pyrrolo[3,2-e]indol-6-yl]-3-oxoprop-1-enyl]-1-methylpyrrol-3-yl]butanamide			0.345	0.00754	0.153
act	670654	[2-[Bis(2,2,2-trichloroethoxy)phosphoryloxymethyl]-5-(5-fluoro-2,4-dioxopyrimidin-1-yl)oxolan-3-yl] butanoate			0.356	0.00757	0.154
act	648644	Dimethyl 2-{[(2,6-dichloro-4-nitrophenyl)amino](oxo)acetyl}-3-oxobutanedioate			0.35	0.00765	0.155
act	800998	GDC-0623	NA	NA	-0.347	0.00767	0.155
act	661938	6-Chloro-5,8-dihydroxy-7-[(2-hydroxyethyl)amino]naphthalene-1,4-dione			-0.38	0.00768	0.155
act	744991	(11as)-8-[3-(4-6-[4-(3-[(11ar)-7-methoxy-5-oxo-2,3,5,11a...			0.35	0.00769	0.156
act	749	8-Azaguanine	NA	NA	0.344	0.00771	0.156
act	185060	Hydrazinecarbothioamide, 2-[(5-hydroxy-2-pyridinyl)methy...			0.355	0.00774	0.156
act	746931	N-[4-[2-[2-[[4,6-Bis[hydroxy(methyl)amino]-1,3,5-triazin-2-yl]amino]ethyldisulfanyl]ethyl-propylamino]-6-[hydroxy(methyl)amino]-1,3,5-triazin-2-yl]-N-methylhydroxylamine			0.349	0.00774	0.156
act	734141	6-(3-Aminopropyl)-5,6-dihydro-8,9-dimethoxy-3-nitro-5,11...			0.349	0.00775	0.156
act	697127		NA	NA	0.346	0.00775	0.156
act	654283	Pyrayafoline B			0.405	0.00778	0.157
act	150412	7-[3,4-dihydroxy-5-(hydroxymethyl)oxolan-2-yl]-4-(3-methylbut-2-enylamino)pyrrolo[2,3-d]pyrimidine-5-carbonitrile			-0.346	0.0078	0.157
act	737707	(3Z)-5-Methoxy-6-methyl-3-[(4-phenoxyphenyl)methylidene]-1H-indol-2-one			0.358	0.00781	0.157
act	22945	WLN: WNR CG DG FNW			0.362	0.00782	0.157
act	736162	1-[3-(4-Fluorophenyl)-5-(4-methylsulfanylphenyl)-3,4-dihydropyrazol-2-yl]ethanone			0.349	0.00783	0.157
act	633370	3-(5-(4-Methylphenyl)-1,3,4-oxadiazol-2-yl)-1-phenyl-1H-pyrazolo[3,4-b]quinoxaline			0.387	0.00784	0.157
act	357092	Carboxyphthalato platinum			0.349	0.00785	0.157
act	633203	LS-150387			0.379	0.00792	0.158
act	635306	3'-Benzoyl-5,7-dichlorospiro[1H-indole-3,2'-oxirane]-2-one			0.375	0.00792	0.158
act	704077	6-(5-Nitropyridin-2-yl)sulfanyl-7H-purin-2-amine			0.351	0.00793	0.158
act	672228	6,7,8'-Tris(dimethylamino)-1,2-diphenylspiro[1,2-dihydrophenalene-3,4'-naphthalene]-1'-one			0.351	0.00795	0.158
act	721047	1-Cyclopropyl-2-(2-methoxyphenyl)quinolin-4(1h)-one			-0.371	0.00796	0.158
act	695040	1,2-Bis[3-(3,4-diacetoxyphenyl)-propenoyloxy]ethane			0.348	0.00797	0.158
act	130830	5-[(Benzylamino)methyl]quinolin-8-ol			0.345	0.00797	0.158
act	83279	agecorynin c			0.342	0.00797	0.158
act	407613	4b,10b,11,12-Tetrahydro-6(5H)-chrysenone			-0.364	0.00797	0.158
act	711947	N-[3-[7-[7-Acetamido-1-(chloromethyl)-5-hydroxy-1,2-dihydrobenzo[e]indol-3-yl]-7-oxoheptanoyl]-1-(chloromethyl)-5-hydroxy-1,2-dihydrobenzo[e]indol-7-yl]acetamide			0.342	0.00798	0.158
act	617566	Manganese (1+), chloro[[2-hydroxybenzoic acid(2,6- pyrid...	NA	NA	0.342	0.00804	0.16
act	691250	2-[(9-Amino-5-methylacridine-4-carbonyl)amino]ethyl-dimethyl-[(1-methyl-5-nitropyrrol-2-yl)methyl]azanium;chloride			0.345	0.00805	0.16
act	645827	5-(2-(dimethylamino)ethylamino)-8-hydroxy-6H-[1,2,3]tria...	NA	NA	0.374	0.00806	0.16
act	719162	11-(5'-Bromopentylidine)-5,6-dihydro-2,3-dimethoxy-6-met...			0.35	0.00809	0.16
act	802450	BAY-1251152		Clinical trial	0.344	0.0081	0.16
act	667641	N-(5-Carboxy-5-{4-[(2,4-diamino-pteridin-6-ylmethyl)-amino]-benzoylamino}-pentyl)-phthalamic acid			0.342	0.0081	0.16
act	765695	PD 184352	PK:MAP2K	Clinical trial	-0.347	0.00811	0.16
act	53327	N,N'-Bis(salicylideneamino)oxamide			0.353	0.00812	0.16
act	157725	1h-1,4-benzodiazepine-1-acetic acid, 7-chloro-2,3-dihydr...			0.35	0.00812	0.16
act	734395	2-Amino-6-(benzylamino)-4-(2,4-dichlorophenyl)pyridine-3,5-dicarbonitrile			0.35	0.00813	0.16
act	646190	Ethyl 2-(1-ethoxy-2-(phenylseleno)propoxy)-1-cyclopentene-1-carboxylate			0.378	0.00815	0.16
act	268993	Deferoxamine Hydrochloride	NA	NA	0.341	0.00815	0.16
act	672106	2-Amino-12-phosphonododecanoic acid			0.36	0.00816	0.16
act	733880	6-(3-Bromopropyl)-5,6-dihydro-7,8-dimethoxy-3-nitro-5,11...			0.398	0.00818	0.161
act	674350	3,6-Dimethylthio-dihydrotetrazine			0.347	0.00819	0.161
act	683252	(2-Nitrophenyl)methyl (1S,5S,8Z,12S,20R)-21-oxa-13-azapentacyclo[10.9.0.01,20.05,20.014,19]henicosa-8,14,16,18-tetraen-6,10-diyne-13-carboxylate			0.353	0.0082	0.161
act	699221	6,7-Dimethyl-3-[4-(4-nitrophenyl)piperazin-1-yl]quinoxaline-2-carbonitrile			0.373	0.00821	0.161
act	23477	1,2-Dichloro-4-[(E)-2-nitrobut-1-enyl]benzene			0.366	0.00821	0.161
act	625902		NA	NA	0.377	0.00824	0.161
act	375575	Cyclopentenyl Cytosine			0.344	0.00825	0.161
act	764042	ARRY-162	PK:STK,MAP2K,MAP2K1,MAP2K2	FDA approved	-0.344	0.00826	0.161
act	662304	Fluoroanilino-azatoxin			0.366	0.00827	0.161
act	782958	N-[2-(pyrrolidin-1-yl)-ethyl]-L-olivosyl-AF (2N)	NA	NA	0.343	0.0083	0.162
act	658409	11-(4-Fluoro-6-(1,4,7,10-tetraoxa-13-azacyclopentadecan-13-yl)-1,3,5-triazin-2-yl)isoindolo[1,2-b][1,3]benzothiazole			0.349	0.00831	0.162
act	799156		NA	NA	0.343	0.00832	0.162
act	716982	7-Benzyl-3,4,10,11-tetrathia-7-azatricyclo[6.3.0.02,6]undeca-1(8),2(6)-diene-5,9-dithione			0.34	0.00837	0.163
act	679431	2-Ethoxy-6-keto-estradiol	NA	NA	0.34	0.00841	0.163
act	683289		NA	NA	0.34	0.00841	0.163
act	800956	Trametinib	NA	NA	-0.343	0.00841	0.163
act	407809	uzarin			0.343	0.00842	0.163
act	652174	1-(2-Hydroxybenzoyl)-3-methyl-4-(4-methoxybenzylidene)-1H-pyrazole-5(4H)-one			0.349	0.00844	0.163
act	705334	2-Tert-Butyl-4-(phenylthiomethylene)-1,2-dihydroisoquinoline-3(4H)-one			0.365	0.00848	0.164
act	725026	5-[1-(4-Chlorophenyl)-4-hydroxy-pyrazol-3-yl]-3H-1,3,4-oxadiazol-2-one			0.345	0.0085	0.164
act	761188	Rabusertib	PK:STK,CHEK,CHEK1	Clinical trial	0.342	0.0085	0.164
act	740122	N-(2-Amino-phenyl)-4-{1-[4-(4-trifluoromethylphenyl)-pip...			0.342	0.00851	0.164
act	303534	oxazolidine, 3-[(cyclohexyloxy)methyl]-4,4-dimethyl-			0.345	0.00855	0.165
act	630717	Nilacrone			0.372	0.00856	0.165
act	819558	MRTX-1257	NA	NA	0.345	0.00857	0.165
act	715643	Methyl (1R,3R,4S,5S,13S,16S,17R,18S,20S,21S)-7-[2,5-dihydroxy-3,4-bis(5-oxo-2H-furan-3-yl)-6-[(1S,3S,4R,5R,13R,16R,17S,18R,20R,21R)-4,5,16,21-tetrahydroxy-17-methoxycarbonyl-13,17,20-trimethyl-2,6-dio			0.339	0.00857	0.165
act	678525	Protein: PAHIV4	NA	NA	0.379	0.00858	0.165
act	620050	GNF-Pf-1921			0.379	0.00858	0.165
act	720732	6,7-dimethyl-1,4-di-N-oxide-3-methylquinoxalin-2-yl-4-(4...			0.345	0.0086	0.165
act	733503	cis-6-(3-Bromopropyl)-12,13-dihydro-8,9-dimethoxy-3-nitr...			0.342	0.00862	0.165
act	722900	N-(3-Iodo-1-propyl)-5,6-dihydro-2,3-dimethoxy-8,9-methyl...			0.348	0.00863	0.165
act	655276		NA	NA	0.41	0.00864	0.165
act	745098	sr16388			0.342	0.00864	0.165
act	800871	Ro-5126766	NA	NA	-0.342	0.00864	0.165
act	700642	1,3-Bis[5-[1-(chloromethyl)-5-nitro-1,2-dihydrobenzo[e]indole-3-carbonyl]-2-methyl-pyrazol-3-yl]urea			0.371	0.00868	0.166
act	717200	(11E)-11-(4-Chlorobutylidene)-15,16-dimethoxy-20-methyl-5,7-dioxa-20-azapentacyclo[10.8.0.02,10.04,8.013,18]icosa-1(12),2,4(8),9,13,15,17-heptaen-19-one			0.344	0.0087	0.166
act	645351	[Bis(aminomethyl)diethylsilane]dichloroplatinum (II)	NA	NA	0.338	0.00874	0.167
act	666226	1-(8-(2-Methoxyphenyl)-7-methyl-7,8-dihydro-6H-[1,3]dioxolo[4,5-g]chromen-6-yl)pyrrolidine			0.382	0.00875	0.167
act	50273	Pyridine, 3-[[4-[bis(2-chloroethyl)amino]-2-methylbenzyl...			0.341	0.00875	0.167
act	722316	1-Methyl-N-[(E)-1-quinolin-2-ylethylideneamino]benzimidazol-2-amine			-0.338	0.00879	0.167
act	38887	guaneran			0.341	0.0088	0.167
act	720431	2-[3-[(Z)-2-Hydroxy-2-phenylethenyl]pyrido[2,3-b]pyrazin-2-yl]-1-phenylethanone			0.356	0.00881	0.167
act	707692	Benzamide, N-[[[4-(3-methoxyphenyl)-2-methyl-5-phenyl- 1...			0.353	0.00883	0.167
act	201628	Carbonic dihydrazide, bis[(3,5-dibromo-2-hydroxyphenyl)m...			0.344	0.00883	0.167
act	667877	1-[(E)-1-Pyridin-2-ylethylideneamino]-3-[2-[[(E)-1-pyridin-2-ylethylideneamino]carbamothioylamino]ethyl]thiourea			0.338	0.00883	0.167
act	728856	5,6-Dihydro-6-[3-(3-imidazolylpropyl)amino-1-propyl]-5,1...			0.344	0.00885	0.167
act	675278	5-Hydroxy-7-amino(1,2,3)thiadiazole[5,4-d]pyrimidine			0.341	0.0089	0.168
act	640328	ternatin	NA	NA	0.424	0.00891	0.168
act	650361		NA	NA	0.374	0.00892	0.168
act	112758	Rubomycin	NA	NA	0.338	0.00894	0.169
act	632795	Ammonia; butane-1,4-diamine; chloroplatinum(1+)			0.381	0.00895	0.169
act	665872	LS-114726			0.34	0.00896	0.169
act	800854	Pimasertib	NA	NA	-0.34	0.00896	0.169
act	768069	Cobimetinib (isomer 1)	PK:MAP2K,MAP2K1	FDA approved	-0.343	0.00896	0.169
act	686660	N'-Benzylidene-2-(methylthio)imidazo[2,1-a]isoquinoline-3-carbohydrazide			0.346	0.009	0.169
act	800882	Selumetinib	NA	NA	-0.34	0.00903	0.169
act	683247	Acridine-4-carboxamide, 9-amino-5-methyl- N-[2-(dimethyl...	NA	NA	0.337	0.00913	0.171
act	184692	Aminopterin Derivative	Df		0.337	0.00914	0.171
act	22709	ae 200			0.339	0.00915	0.171
act	691127	NCIChal_000037			0.339	0.00916	0.171
act	648273		NA	NA	-0.345	0.00916	0.171
act	704318	(Z)-2-[4-Amino-6-(3,5,5-trimethyl-4H-pyrazol-1-yl)-1,3,5-triazin-2-yl]-3-[5-(4-nitrophenyl)furan-2-yl]prop-2-enenitrile			0.336	0.00918	0.171
act	304393	Hydrazinecarboximidamide, 2,2'-(9H-fluorene-2,7-diyldiet...			0.339	0.00927	0.173
act	97419	progallin o			0.339	0.00928	0.173
act	637992	10-[2-(Diethylamino)ethylamino]-5-hydroxy-15-methyl-1,14-diazatetracyclo[7.6.1.02,7.013,16]hexadeca-2(7),3,5,9,11,13(16),14-heptaen-8-one;hydrochloride			0.401	0.00929	0.173
act	157469	6,6'-(2,3,5,6-tetramethyl-1,4-phenylene)bis(methylene)bi...			0.345	0.0093	0.173
act	700443	7H-1,2,4-Triazolo[3,4-b][1,3,4]thiadiazine, 3,3'-(1,8-oc...			0.344	0.00933	0.174
act	620257	6H-Pyrido[4,3-b]carbazolium, 2-[2-(diethylamino)ethyl]- ...			0.336	0.00933	0.174
act	711994	7-Quinolinecarboxylic acid, 2-((1E)-2-(3,4-dihydroxyphenyl)ethenyl)-8-hydroxy-			0.347	0.00935	0.174
act	84092	7-[(Naphthalen-1-ylamino)(phenyl)methyl]quinolin-8-ol			0.341	0.00938	0.174
act	764764	ONX-0801	TYMS	Clinical trial	0.341	0.00938	0.174
act	800940	TAK-733	NA	NA	-0.338	0.00938	0.174
act	737428	arylpurines			0.354	0.00941	0.174
act	92188	isoquinaldaldehyde, thiosemicarbazone	NA	NA	0.379	0.00945	0.175
act	529432	2'-Deoxy-2'-fluorocytidine	NA	NA	0.338	0.00947	0.175
act	698065	3-[(4-Chlorophenyl)methyl]-4-[(E)-(3-methoxyphenyl)methylideneamino]-1H-1,2,4-triazol-5-one			0.356	0.00952	0.176
act	26821	o-Aminoazotoluene	NA	NA	0.346	0.00956	0.177
act	749292	3-methoxy-1-nitrosopyrido[3,2:4,5]pyrrolo[1,2-c][1,2,3]b...			0.338	0.00957	0.177
act	79688	N-[(E)-[4-[Bis(2-chloroethyl)amino]-2-methylphenyl]methylideneamino]-2-(7-hydroxy-2-oxochromen-4-yl)acetamide			0.34	0.00963	0.177
act	67090	5,7-Dibromo-2-[(E)-2-(4-hydroxy-3-methoxyphenyl)ethenyl]quinolin-8-ol			0.34	0.00966	0.178
act	723909	1,4-di-N-oxide-2-etoxycarbonyl-3-trifluormethylquinoxaline.			0.337	0.00968	0.178
act	657297	1-Propanone, 3-(diethylamino)-1-(4-methylphenyl)-, hydrochloride			-0.34	0.00968	0.178
act	730520	(5E)-5-[(4-Chlorophenyl)methylidene]-2-[[4-[2-[[(5E)-5-[(4-chlorophenyl)methylidene]-4-oxo-1,3-thiazol-2-yl]amino]-1,3-thiazol-4-yl]-1,3-thiazol-2-yl]amino]-1,3-thiazol-4-one			0.37	0.00969	0.178
act	800958	UCN-01	NA	NA	0.337	0.00969	0.178
act	715974	4-Methyl-3-[4-[2-[4-(4-methyl-5-sulfanylidene-1H-1,2,4-triazol-3-yl)phenyl]iminohydrazinyl]phenyl]-1H-1,2,4-triazole-5-thione			0.349	0.00971	0.178
act	638066	2-n-methyl-6-thiaellipticinum iodide	TOP2		0.334	0.00972	0.178
act	761409	n1-(1,3-benzothiazol-6-yl)-2-(4-(2-(1,3-dioxo-2,3-dihydr...	NA	NA	0.34	0.00974	0.178
act	704322	(Z)-2-[4-Amino-6-(3,5,5-trimethyl-4H-pyrazol-1-yl)-1,3,5-triazin-2-yl]-3-(3-nitrophenyl)prop-2-enenitrile			0.334	0.00977	0.179
act	627771	4-Aza-2'-phenyl-5.alpha.-cholestano[3,2-c]pyrazole	NA	NA	0.381	0.00984	0.18
act	668383	N-(2,3-Dimethoxy-[1,3]benzodioxolo[5,6-c]phenanthridin-13-yl)-N',N'-dimethylethane-1,2-diamine			0.342	0.00984	0.18
act	29865	N-[(E)-(2-Hydroxyphenyl)methylideneamino]-2-[2-[(2Z)-2-[(2-hydroxyphenyl)methylidene]hydrazinyl]-2-oxoethyl]sulfanylacetamide			0.336	0.0099	0.181
act	639659	N-(1-Cyano-2-methoxyethyl)doxorubicin, hemihydrate			0.336	0.00992	0.181
act	719999	5-(p-anisylidene-3-phenyl-4-oxothiazolidenyl-3-phenyl-4-...			0.345	0.00993	0.181
act	812172	ARS-1620	KRAS	Clinical trial	0.342	0.00995	0.181
act	688237	[(1R,2R,3R,4S,5S,7R,8R,9S,10S,14S)-2,8,14-Triacetyloxy-7-hydroxy-1,5,9,12,12-pentamethyl-13-oxo-4-tetracyclo[7.6.0.03,7.010,14]pentadecanyl] benzoate			0.351	0.00996	0.181
act	710402	2-(2-Pyridylsulfanyl)-6-(trifluoromethyl)quinoxaline			0.345	0.00996	0.181
act	697536	N-[2-[1-(Chloromethyl)-5-nitro-1,2-dihydrobenzo[e]indole-3-carbonyl]-1H-indol-5-yl]-1-benzofuran-2-carboxamide			0.336	0.00999	0.182
act	634766		NA	NA	0.368	0.01	0.182
act	407806	echujetin	NA	NA	0.336	0.01	0.182
act	642624		NA	NA	0.384	0.0101	0.182
act	660026	4-[(5S,8R,8Ar)-5-anilino-8-methoxy-5,5a,6,8,8a,9-hexahydro-[2]benzofuro[6,5-f][1,3]benzodioxol-9-yl]-2,6-dimethoxyphenol			0.38	0.0101	0.183
act	724983	24,24-Dimethyl-23-oxaheptacyclo[14.6.1.118,21.01,18.02,15.04,13.06,11]tetracosa-4,6,8,10,12-pentaene-3,14,17-trione			0.379	0.0101	0.183
act	82274	Ethyl 4-[bis(2-{[(4-methylphenyl)sulfonyl]oxy}ethyl)amino]benzoate			0.364	0.0101	0.183
act	768021		NA	NA	-0.338	0.0101	0.183
act	632848	4-Bromo-(2'-methyl-4'-N,N-bis-2'-cyanoethylamino) azoben...			0.375	0.0102	0.184
act	710770	(5r)-3-(4-Chlorophenyl)-5-[5-(3-nitrophenyl)-2-furyl]-4,5-dihydro-1h-pyrazole			0.364	0.0102	0.184
act	401575	benzimidazole, 5,6-dichloro-1-.beta.-d-ribofuranosyl- (8ci)	NA	NA	0.357	0.0102	0.184
act	745487	[3-(3-Hydroxy-4-methoxyphenyl)-5-phenyl-3,4-dihydropyrazol-2-yl]-(3,4,5-trimethoxyphenyl)methanone			0.337	0.0102	0.184
act	123978	Sarveroside			0.335	0.0102	0.184
act	93134	hellebrin			0.332	0.0102	0.184
act	651666	4-(Acetylamino)-N-(2-(5-bromo-2-hydroxyphenyl)-3-chloro-4-oxo-1-azetidinyl)benzamide			0.346	0.0103	0.185
act	675186	N-(4-Chloro-3-((3-Methyl-2-Butenyl)Oxy)Phenyl)-2-Methyl-3-Furancarbothioamide			0.34	0.0103	0.185
act	29630	dichloroamethopterin	NA	NA	0.335	0.0103	0.184
act	759195	Epirubicin	TOP2	FDA approved	0.334	0.0103	0.185
act	627975	Benzo[g]pteridine-2,4(3H,10H)-dione, 10-(3,5-dimethylphenyl)-3-methyl-			-0.379	0.0103	0.185
act	253995	piperidinium europium benzoyl trifluoroacetonate			0.396	0.0104	0.187
act	653861	(5S,5As)-5-[3-(dimethylamino)propylamino]-9-(4-hydroxy-3,5-dimethoxyphenyl)-5a,6,8a,9-tetrahydro-5H-[2]benzofuro[6,5-f][1,3]benzodioxol-8-one;hydrochloride			0.378	0.0104	0.187
act	522958	4(3H)-Quinazolinone, 3-hydroxy-2-phenyl-			0.334	0.0104	0.187
act	638718	Ecteinascidin 729	NA	NA	0.37	0.0105	0.187
act	666109		NA	NA	0.339	0.0105	0.187
act	123979	Thevetin			0.336	0.0105	0.187
act	787794	;3-Benzofurancarboxylic acid, 2-(3,4-dihydroxyphenyl)-2,...	NA	NA	0.334	0.0105	0.187
act	701029	4-Methyl-N-[(E)-(1-oxoaceanthrylen-2-ylidene)amino]benzamide			0.331	0.0105	0.187
act	771762	{2-[4-(7-chloro-quinolin-4-yl)-piperazin-1-yl]-pyrmidin-...	NA	NA	-0.34	0.0105	0.187
act	651201	Tri(isobutenyl)-p-anisylantimony bromide	NA	NA	-0.382	0.0105	0.187
act	679509	N-(4-Chlorophenyl)-3-[4-[(3,4-dimethylphenyl)diazenyl]-3,5-dimethylpyrazol-1-yl]-3-oxopropanamide			0.336	0.0106	0.188
act	749296	2-methoxy-5h-pyrido[3,2:4,5]pyrrolo[3,2-c]cinnoline			0.333	0.0106	0.189
act	740647	5,6-dihydro-9-methoxy-6-(3-dimethylamino-1-propyl)-5,11-...			0.333	0.0106	0.189
act	21662	2-Bromophenazine 5,10-dioxide			0.345	0.0107	0.189
act	657993	4H-Pyrazolo[3,4-d][1,3]thiazin-6-amine, 1-(2-hydroxybenz...			0.336	0.0107	0.189
act	740276	5,6-dihydro-6-[3-(hydroxyethyl)amino-1-propyl]-5,11-diox...			0.333	0.0107	0.189
act	740129	3-(4-Chlorophenyl)-5-(3,4,5-trimethoxyphenyl)-1H-imidazol-2-one			0.332	0.0108	0.192
act	716814	(1S,7R,8R,10S)-8-Chloro-10-(4-nitrophenyl)sulfanyl-3,5-diphenyl-4-azatricyclo[5.2.1.02,6]deca-2,5-diene			0.347	0.0109	0.192
act	726768	5,6-Dihydro-6-[(4-tert-butyloxycarbonylamino)-1-butyl]-5...			0.341	0.0109	0.192
act	276362	1H-Pyrrole-3,4-dimethanol, 1-(4-bromophenyl)-2,5-dimethy...			0.335	0.0109	0.192
act	291927	Ethyl 4-(4,5-dihydro-1,3-thiazol-2-ylcarbamoylamino)benzoate			0.335	0.0109	0.192
act	800879	SB-1317	NA	NA	0.335	0.0109	0.192
act	767420		PK:Not Available		-0.335	0.0109	0.193
act	626735	4-Piperidinone, 3,5-dimethyl-1-nitroso-2,6-diphenyl-			0.334	0.011	0.194
act	793453	;NTD-148	NA	NA	0.331	0.011	0.194
act	10520	2-[(Z)-2-(4-Chlorophenyl)ethenyl]-1-methylquinolin-1-ium iodide			-0.334	0.011	0.194
act	711993	4-[(E)-2-[6-[(E)-2-(3,4-Dihydroxyphenyl)ethenyl]pyridin-2-yl]ethenyl]benzene-1,2-diol			0.343	0.0111	0.195
act	722572	Ethyl 1-[(2,4-dichlorophenyl)methyl]-5-hydroxy-2-methyl-7,8,9,10-tetrahydro-6H-pyrrolo[3,2-c]carbazole-3-carboxylate			0.334	0.0111	0.195
act	643812	antineoplastic-643812	NA	NA	0.331	0.0111	0.195
act	748263	N-[(E)-(3-Ethoxy-2-hydroxyphenyl)methylideneamino]-3-[[2-(trifluoromethyl)pyridin-4-yl]amino]benzamide			0.331	0.0111	0.195
act	287513	Ametantrone acetate	NA	NA	0.331	0.0111	0.195
act	273432	Hexanedioic acid, bis[[1-[4-[(3-amino-2,3,6-trideoxy-.al...			0.331	0.0111	0.195
act	768020		NA	NA	-0.334	0.0111	0.195
act	56054	ATPU	NA	NA	0.331	0.0112	0.196
act	653830	N'-(Cyano(2-hydroxy-1-naphthyl)methyl)-2-phenylacetohydrazide			0.331	0.0112	0.196
act	720248	Methyl N-[6-[(4-fluorophenyl)sulfonylamino]-1H-benzimidazol-2-yl]carbamate			-0.336	0.0112	0.196
act	785628	;(R)-5,6-dihydro-6-(tetrahydrofuran-3-yl)-2,3-dimethoxy-...	NA	NA	0.383	0.0113	0.197
act	714366	7-(4-Methoxyphenyl)-6,7,8,9-tetrahydropyrimido[4,5-b]quinoline-2,4-diamine			0.336	0.0113	0.197
act	142493	N-[(E)-(5-Bromo-2-hydroxyphenyl)methylideneamino]-3-(4-hydroxyphenyl)propanamide			0.336	0.0113	0.197
act	529861	Chlorasquin	NA	NA	0.33	0.0113	0.197
act	46401	.alpha.-Sarcin	NA	NA	0.328	0.0113	0.197
act	628946	5,6-Dimethoxy-9-(methylthio)furo[3',4':4,5]cyclopenta[1,2,3-ij]isoquinoline			0.378	0.0114	0.199
act	784604	;11-(3-chlorophenylphenyl)-[4,3-c][1,8]phenanthroline-6-one	NA	NA	0.336	0.0114	0.198
act	753576	n1-(6-fluoro-1,3-benzothiazol-2-yl)-2-2-methoxy-5-[(z)-2...			0.333	0.0114	0.199
act	800864	Refametinib	NA	NA	-0.33	0.0115	0.2
act	617964	N-[2-(Dimethylamino)ethyl]-8-methylacridine-4-carboxamide;hydrochloride			0.377	0.0116	0.201
act	705930	[5-[2-(3,4-Dimethoxyphenyl)-2,3-dihydro-1,5-benzothiazepin-4-yl]-6-hydroxy-3-methyl-1-benzofuran-2-yl]-phenylmethanone			0.338	0.0116	0.201
act	734396	2-Amino-6-(benzylamino)-4-(2-chlorophenyl)pyridine-3,5-dicarbonitrile			0.335	0.0116	0.201
act	716765	1-Allyl-3-[(Z)-(5-nitro-2-oxo-indolin-3-ylidene)amino]thiourea			0.332	0.0116	0.2
act	626622	2-[(E)-(1-Benzoyl-3-methyl-5-oxo-4,5-dihydro-1H-pyrazol-4-yl)diazenyl]benzoic acid			0.373	0.0117	0.201
act	768584		NA	NA	0.332	0.0117	0.202
act	736988	6-(3-Aminopropyl)-5,6-dihydro-9-methoxy-5,11-dioxo-11H-i...			0.329	0.0117	0.202
act	18451	Fluoren-9-one, 2-[bis(p-bromobenzyl)amino]-			0.326	0.0117	0.201
act	650471	calactin	NA	NA	0.326	0.0117	0.201
act	675249	1-N,4-N-Bis[3-[2-chloroethyl(ethyl)amino]-5-[(dimethylamino)methyl]phenyl]bicyclo[2.2.2]octane-1,4-dicarboxamide;hydrochloride			0.334	0.0118	0.203
act	728088	Bis-{(5,6-dihydro-5,11-diketo-11H-indeno[1,2-c]isoquinol...			0.334	0.0118	0.203
act	825088	GSK-3484862	NA	NA	0.389	0.0119	0.204
act	775460		NA	NA	0.34	0.012	0.206
act	757425	OUABAIN			0.337	0.012	0.206
act	742906	4-Amino-N-[(Z)-1-(7-methoxy-1-benzofuran-2-yl)ethylideneamino]-3-propyl-2-sulfanylidene-1,3-thiazole-5-carboxamide			0.331	0.012	0.206
act	686560	[Di-17.alpha./.beta.-(2-ethoxy-3-hydroxyestra-1,3,5(10)-...	NA	NA	0.328	0.012	0.206
act	758881	orlistat (usan)			0.328	0.012	0.206
act	625582	N-Phenyl-2-(2-phenylvinyl)-1-naphthalenamine			0.379	0.0121	0.207
act	625857		NA	NA	0.363	0.0121	0.207
act	709521	2-(4-Methoxyphenyl)-5-phenyl-1H-[1,2,4]triazino[4,3-a]quinoxaline			0.349	0.0121	0.207
act	719720	2-[(2,6-dimethylimidazo[2,1-b][1,3]thiazol-5-yl)methyl]-5,6-dimethoxy-3-methylcyclohexa-2,5-diene-1,4-dione			0.333	0.0121	0.207
act	114382	SC-60646			0.327	0.0121	0.207
act	761219		NA	NA	-0.327	0.0121	0.207
act	711082	(3E)-5-Chloro-3-[(6-chloroimidazo[2,1-b][1,3]thiazol-5-yl)methylidene]-1H-indol-2-one			-0.356	0.0121	0.207
act	640199	antineoplastic-d640199			0.355	0.0122	0.207
act	85561	3-hydroxy-4-((1-hydroxynaphthalen-2-yl)diazenyl)-7-nitro...	NA	NA	0.348	0.0122	0.207
act	87413	Vilangin			0.333	0.0122	0.207
act	717557	STK231324			0.33	0.0122	0.207
act	328186	3',4',5'-trimethoxy-3-hydroxy flavone			0.327	0.0122	0.207
act	86078	cynotoxin			0.327	0.0122	0.207
act	370463	3-Thiophen-2-yl-4,5-dihydro-2H-benzo[g]indazole			-0.33	0.0122	0.207
act	701662	Ethyl 3-methyl-4-oxo-[1,2,3,5]tetrazino[5,4-a]indole-10-carboxylate			0.383	0.0123	0.208
act	752331	(z)-6-(2-(pyridin-2-ylmethylene)hydrazinyl)-9h-purine-9-...			0.33	0.0123	0.208
act	7535	lanatoside b	NA	NA	0.33	0.0123	0.208
act	179940	wln: t56 bnonj bo fnw i- at6n dntj d1	NA	NA	0.327	0.0123	0.208
act	762153	ST-3595	HDAC	Clinical trial	0.327	0.0123	0.208
act	724005	7-methoxy-8-{3-[7-methoxy (11aS)-1,2,3,10,11,11a-hexahyd...			0.327	0.0123	0.208
act	741433	(1,4-dioxy-3,6-bis-trifluoromethyl-quinoxalin-2-yl)-naph...			0.327	0.0123	0.208
act	718157	4-[(Z)-Hydroxyiminomethyl]-2-[(E)-hydroxyiminomethyl]-6-methoxyphenol			0.329	0.0124	0.209
act	681145	Antcin B	NA	NA	0.326	0.0124	0.209
act	618932	MEGxp0_000612			0.324	0.0124	0.209
act	700502	4'-Phenylthio-avarone	NA	NA	0.347	0.0126	0.211
act	773201		NA	NA	0.329	0.0126	0.211
act	702137	N-[2-(1H-Indol-3-yl)ethyl]-4-[[[(E)-3-(4-phenylphenyl)prop-2-enoyl]amino]methyl]benzamide			0.326	0.0126	0.211
act	740109	3,6-di(trifluoromethyl)-2-(thien-2-ylcarbonyl)quinoxalin...			0.326	0.0126	0.212
act	673150	STL334553			0.323	0.0126	0.211
act	67586	2-Naphthacenecarboxamide, N-[(6,7-dihydro-7-oxo-v-triazo...			0.323	0.0126	0.211
act	649178	5-bromo-6-nitroisatin			0.365	0.0127	0.212
act	635371	Sedoxantrone Trihydrochloride	NA	NA	0.361	0.0127	0.212
act	689448	6,6'-(pyridine-2,6-diyldiethyne-2,1-diyl)dipyridin-2-amine			0.337	0.0127	0.212
act	756738	Digoxin	NonCan:CardG	FDA approved	0.334	0.0127	0.212
act	781671	2-Propen-1-one, 1,3-bis[8-hydroxy-2-methyl-7-(4-morpholi...	NA	NA	0.328	0.0127	0.212
act	689137	16-Methoxy-4-(4-methoxyphenyl)-9-propan-2-yl-4,20-diazapentacyclo[11.7.0.02,6.07,12.014,19]icosa-1(13),14(19),15,17-tetraene-3,5-dione			0.326	0.0127	0.212
act	782890		NA	NA	0.325	0.0127	0.213
act	746708	Desmethylbrefeldin A			-0.328	0.0127	0.212
act	653844	N'-(Cyano(3-hydroxyphenyl)methyl)-2-hydroxybenzohydrazide			0.368	0.0128	0.214
act	736829	6-(5-Aminopentyl)-5,6-dihydro-5,11-diketo-11H-indeno[1,2...			0.325	0.0128	0.213
act	704971	(2S)-N-[(2R)-1-[(2,4-Dimethoxyphenyl)methylamino]-1-oxopropan-2-yl]-N-methyl-1-[(2S)-3-methyl-2-[methyl-[(2S)-3-methyl-2-[[(2S)-3-methyl-2-(octanoylamino)butanoyl]amino]butanoyl]amino]butanoyl]pyrroli			-0.322	0.0128	0.214
act	650959	1,1,3-Tribenzyl-3-butyl-2-cyanoguanidine			-0.328	0.0128	0.214
act	246014	Benzo[c]phenthridinium, 3-hydroxy-2,8,9-trimethoxy- 5-me...	NA	NA	0.36	0.0129	0.214
act	685860	Ethyl 5-[(2-ethoxycarbonyl-1H-indol-5-yl)methyl]-1H-indole-2-carboxylate			0.33	0.0129	0.214
act	719700	4-Chloro-N-[(E)-1-(1H-imidazo[4,5-b]pyridin-2-yl)ethylideneamino]benzamide			0.327	0.0129	0.214
act	757927	3,5-bis(4-hydroxy-3-methoxystyryl)-n-(3-chloro-4-fluorop...	NA	NA	0.325	0.0129	0.214
act	645815	5-Hydroxy-10-[2-(2-hydroxyethylamino)ethylamino]-1,14,15-triazatetracyclo[7.6.1.02,7.013,16]hexadeca-2(7),3,5,9,11,13(16),14-heptaen-8-one;2-hydroxypropanoic acid			0.352	0.013	0.216
act	675772	Glutamic acid, N-[4-[[6-(trifluoromethyl)-2-quinoxalinyl...			0.33	0.013	0.215
act	734430	5-Fluoro-2'-deoxyuridyl 5-nitrofurfuryl N-(2,3-dihydroxy...			0.324	0.013	0.215
act	720134	2-[(E)-[5-[(E)-(Diaminomethylidenehydrazinylidene)methyl]-4,11-diphenyl-1,3,6,10-tetrazatricyclo[7.3.0.02,6]dodeca-2,4,7,9,11-pentaen-12-yl]methylideneamino]guanidine;hydrochloride			-0.327	0.013	0.215
act	628527	2-Phenyl-5H-naphtho[1,8-bc]furan-5-one			0.352	0.0131	0.216
act	75782	Pheophorbide b	NA	NA	0.33	0.0131	0.217
act	289517	L-Glutamic acid, N-[4-[[(2-amino-1,4-dihydro-4-oxo- 6-qu...	NA	NA	0.324	0.0131	0.216
act	625409	3-((1H-imidazol-1-yl)methyl)-1-benzyl-5-nitro-1H-indole-...			0.404	0.0132	0.218
act	720238	5-Bromo-N-[(E)-[(E)-3-(5-nitrofuran-2-yl)prop-2-enylidene]amino]thiophene-2-carboxamide			-0.332	0.0132	0.218
act	603577	Platinum, dichloro[dimethylsilylenebis(methanamine)]-, (...			0.366	0.0133	0.219
act	698104	VRBJCJNVLXEKKP-MDZDMXLPSA-N			0.351	0.0133	0.219
act	675255	1-N,3-N-Bis[4-[2-chloroethyl(ethyl)amino]phenyl]-5-N-[2-(dimethylamino)ethyl]benzene-1,3,5-tricarboxamide;hydrochloride			0.332	0.0133	0.218
act	740646	5,6-dihydro-9-methoxy-6-(3-morpholino-1-propyl)-5,11-dio...			0.323	0.0133	0.218
act	54690	N-[(E)-1-(2,3,4-Trihydroxyphenyl)decylideneamino]pyridine-4-carboxamide			0.323	0.0133	0.218
act	25485	uabaina	NA	NA	0.326	0.0134	0.22
act	734562	6-(3-Aminopropyl)-9-bromo-5,6-dihydro-3-nitro-5,11-dioxo...			0.323	0.0134	0.22
act	709511				0.323	0.0134	0.22
act	626923	N1-(4-hydroxy-1,2-butadien-1-yl)-cytosine (cytallene)			0.32	0.0134	0.219
act	768015		NA	NA	-0.326	0.0134	0.22
act	633251	6,6'-(4,4'-methylenebis(4,1-phenylene))bis(2-(3-ethynylp...			0.374	0.0135	0.22
act	710584	7-Sulfanylidene-6H-[1,3,4]thiadiazolo[2,3-c][1,2,4]triazin-4-one			0.351	0.0135	0.22
act	645830	10-[3-(Dimethylamino)propylamino]-5-hydroxy-1,14,15-triazatetracyclo[7.6.1.02,7.013,16]hexadeca-2(7),3,5,9,11,13(16),14-heptaen-8-one			0.32	0.0135	0.221
act	747273	tetrabutylammonium tris(pentafluoroethyl)trifluorophosphate			-0.323	0.0135	0.221
act	736563	2-(4-chloro-2-methylphenoxy)-N-(4-chlorobenzo[d]thiazol-...			0.331	0.0136	0.221
act	790509	;3-fluoro-9-methoxy-6-(3-morpholinopropyl)-5H-pyrido[3',...	NA	NA	0.325	0.0136	0.221
act	669615		NA	NA	0.32	0.0136	0.221
act	680721	5H-1,4,8,11-Benzotetrathiacyclotridecin- 13,14-dicarboni...			0.319	0.0136	0.222
act	614566	2-Chloro-N-(4,10-dimethyl-2,6-dioxo-2H,6H-pyrano[3,2-g]chromen-3-yl)acetamide			0.361	0.0137	0.222
act	697537	N-[2-[5-Amino-1-(chloromethyl)-1,2-dihydrobenzo[e]indole-3-carbonyl]-1H-indol-5-yl]-1-benzofuran-2-carboxamide			0.343	0.0137	0.223
act	69573	3,12-Dibenzyl-7,8,15,16-tetrathia-3,12-diazadispiro[5.2.5^{9}.2^{6}]hexadecane			-0.325	0.0137	0.223
act	292928	benzyl-4-(benzyloxy)-5,6-dimethylpicolinate			0.327	0.0138	0.224
act	761192	Pevonedistat	NFkB|NEDD8	Clinical trial	0.324	0.0138	0.224
act	621334		NA	NA	-0.35	0.0138	0.223
act	651605	N-(1-Adamantyl)-2-(5-bromo-1H-indol-3-yl)-2-oxoacetamide			0.353	0.0139	0.225
act	87314	Strophanthidol	NA	NA	0.321	0.0139	0.225
act	321239	Mercury, (2-hydroxy-5-nitrophenyl)(6-thioguanosinato-N(7...			0.319	0.0139	0.224
act	728125	3-(4-quinazolinylamino)phenyl 2-chlorobenzoate			-0.333	0.0139	0.225
act	743434	8-(4-{5-[3-(4-fluoro phenyl)-3-oxo-1-prophenyl]-2-methox...			0.321	0.014	0.226
act	143103	methanesulfonamide, n-[4-[(3-methoxy-9-acridinyl)amino]p...			0.321	0.014	0.226
act	693871	8-Quinolinol, 7-[(1-pyrrolidinyl)methyl]-, dihydrochloride			0.318	0.014	0.226
act	716970	1H-Indole-2-carboxamide, N-[4-amino-1-(2-chloroethyl)-2-...			0.318	0.014	0.226
act	34661	pms (van)			-0.321	0.014	0.226
act	639205	N',N'-Dimethyl-N-(5-nitroquinolin-4-yl)propane-1,3-diamine;hydrochloride			-0.324	0.014	0.226
act	645162	BG-461			0.356	0.0141	0.226
act	628935	5,6-Dimethoxy-3-phenyl-2,1-benzisoxazole			0.363	0.0144	0.231
act	734749	6-(3-Azido-propyl)-2,3-dimethoxthy-5,11-dioxo-5,11-dihyd...			0.325	0.0144	0.231
act	695788	N(sup .alpha.)-[4-[(2,4-Diamino-5-methylpyrido[2,3-d] py...			0.317	0.0144	0.232
act	674352	3,6-Dimethylthio-1,2,4,5-tetrazine			0.328	0.0145	0.233
act	740125	3-(4-Chlorophenyl)-5-(3,4-dichlorophenyl)-1H-imidazol-2-one			0.319	0.0145	0.233
act	765616		NA	NA	-0.322	0.0145	0.233
act	668841	4-[tert-butyl(dioxo)[?]yl]benzoic acid			0.331	0.0146	0.234
act	733883	6-(3-Chloropropyl)-5,6-dihydro-7-methoxy-3-nitro-5,11-di...			0.35	0.0147	0.235
act	729027	2-[5-(2-Thiophenaldehyde-5-yy)p-phenylene]benzoxazole			0.336	0.0147	0.235
act	740650	5,6-dihydro-6-[3-(2-hydroxyethyl)amino-1-propyl]-9-metho...			0.319	0.0147	0.235
act	26040	1-Piperidineethanol, .alpha.-[p-(p-chlorostyryl)phenyl]-			-0.324	0.0147	0.235
act	685884	N-(3-(1H-Benzimidazol-1-yl)-1,4-dioxo-1,2,3,4-tetrahydro-2-naphthalenyl)-4-methylbenzenesulfonamide			-0.324	0.0147	0.235
act	636979	Altemicidin	NA	NA	0.354	0.0148	0.236
act	732693	3-chloro-4-(3-chloroanilino)-1-(2-chlorobenzyl)-2,5-dihy...			0.346	0.0148	0.236
act	704388	TimTec1_008492			0.319	0.0148	0.235
act	382046	ZWX6M6AF6L			0.319	0.0148	0.236
act	623521	Dimethyl (1S,2S,6S,8S,15S)-7-[tert-butyl(dimethyl)silyl]oxy-4,4-dimethyl-14-phenylmethoxy-3,5,9-trioxa-10-azatetracyclo[6.6.1.02,6.011,15]pentadec-10-ene-8,15-dicarboxylate			0.382	0.0149	0.237
act	697138		NA	NA	0.327	0.0149	0.237
act	650744	1,1'-Biphenyl, 4,4'bis(thiomethyl)-			0.316	0.0149	0.236
act	84096	8-Quinolinol, 7-[.alpha.-(8-quinolylamino)benzyl]-			0.396	0.0151	0.24
act	56902	GVELGZSFVZANIL-UHFFFAOYSA-N			0.36	0.0151	0.24
act	678522	Protein: 33	NA	NA	0.345	0.0151	0.24
act	734982	Ethyl 4-[6-(2-furyl)-2-(methylsulfanyl)-4-oxo-4,5-dihydr...			0.323	0.0151	0.239
act	374551	FENRETINIDE	Ds	Clinical trial	0.315	0.0151	0.239
act	681463	6,8-Methanoisoquinoline, 5,5'-(1,2-phenylenebismethyl)bi...	NA	NA	0.32	0.0152	0.241
act	766402		NA	NA	-0.32	0.0152	0.24
act	631880	Hydroxy[4-(2-carbamoyl-2-cyanoethenyl)phenyl]methylphosphonic acid			0.364	0.0153	0.241
act	13831	Probes1_000354			0.326	0.0153	0.241
act	773205	3,4,5-Trihydroxy-N-[4-(4-methoxy-phenyl)-thiazol-2-yl]-b...	NA	NA	0.325	0.0153	0.241
act	629738	1-Naphthalenecarboxamide, N,N'-1,8-(octanediyl)bis-			0.323	0.0153	0.241
act	675251	4-N-[3-[2-Chloroethyl(ethyl)amino]-5-[(dimethylamino)methyl]phenyl]-1-N-[3-[2-chloroethyl(hydrazinyl)amino]phenyl]benzene-1,4-dicarboxamide;hydrochloride			0.323	0.0153	0.241
act	741078	Selumetinib	PK:STK,YK,MAP2K,MAP2K1,MAP2K2	FDA approved	-0.317	0.0153	0.241
act	768012		NA	NA	-0.32	0.0153	0.241
act	721618	lissoclinolide tetrenolin			-0.332	0.0153	0.241
act	783799		NA	NA	0.317	0.0154	0.242
act	674493	Hydrazinecarboxamide, N-(1-naphthyl)- 2-[(4-nitrophenyl)...			0.314	0.0154	0.242
act	629286	3-[N-(4-Nitrophenyldithiocarbamoyl)]-propanoic acid			0.385	0.0155	0.243
act	671394	1-p-Anisyl-3-(N,N-dimethyl-p-aminophenyl)-4,5-bis(p-anis...			0.314	0.0155	0.243
act	692011	3-Methyl-4-(methylthio)-1,6-dihydropyrazolo[3,4-c]pyrazole			0.314	0.0155	0.244
act	628909	7-Nitro-3-trifluoroacetamido-1,2,4-benzotriazine 1-oxide			-0.331	0.0155	0.243
act	709505	2-Amino-4-(3,4,5-trimethoxyphenyl)-2,5-dihydropyrano[5,6-c]chromene-3-carbonitrile			0.34	0.0156	0.244
act	737345	9-(Benzyloxycarbonyloxymethyl)-6-(3-bromopropyl)-5,6-dih...			0.331	0.0156	0.244
act	4060	urson			0.325	0.0156	0.244
act	755770	PD-0325901	PK:STK,MAP2K	Clinical trial	-0.316	0.0156	0.244
act	731701	1[(4-n-butyloxyCarbonyl)piperazine-1-yl]diazene-1-ium-1,...			-0.344	0.0156	0.244
act	650262	9-Ethoxy-2,5,11-trimethyl-6H-pyrido[4,3-b]carbazol-2-ium iodide			0.343	0.0157	0.245
act	711102	Ethyl 7-(1,3-benzodioxol-5-yl)-10-methylsulfanyl-2-thia-5,7,9,11-tetrazatricyclo[6.3.1.04,12]dodeca-1(11),3,8(12),9-tetraene-3-carboxylate			0.319	0.0157	0.245
act	717123	6-{[2-(Dimethylamino)ethyl]amino}-7h-indeno[2,1-c]quinolin-7-one			0.316	0.0157	0.245
act	781429	OP449	NA	NA	0.358	0.0158	0.246
act	697452	Andrastin A	NA	NA	0.321	0.0158	0.246
act	678131	5H-Naphtho[2,3-c][1]benzazepine-6,13-dione			0.318	0.0158	0.246
act	624420	Benzamide, 4-amino-N-[2-(3-nitrophenyl)-1- (2-thio-6-hyd...			0.318	0.0158	0.246
act	169517	p-Benzoquinone, 2-(5,7-dihydroxy-4-oxo-2-chromanyl)- 5-m...			0.313	0.0158	0.246
act	252926	oudenone k			0.321	0.0159	0.246
act	704244	AQ-776/42801638			0.315	0.0159	0.247
act	709580	6-Hexyl-7-hydroxy-2-imino-N-[3-(trifluoromethyl)phenyl]chromene-3-carboxamide			0.313	0.0159	0.246
act	642914	[5-[[2-Chloroethyl(nitroso)carbamoyl]amino]-3,4-dihydroxy-6-methoxyoxan-2-yl]methyl octadecanoate			0.374	0.016	0.247
act	653318	3-(1-Adamantylamino)-2-hydroxy-5H-chromeno[3,4-b]pyrazin-5-one			0.353	0.016	0.247
act	135687	Acetylmarinobufogenin	NA	NA	0.353	0.0161	0.249
act	732632	(3-Thioxo-5,6-dihydro-imidazo[2,1-c][1,2,4]thiadiazol-7-...			0.329	0.0161	0.249
act	663336				0.32	0.0161	0.249
act	221266	Benzoic acid, 3,4-dichloro-, [1-[4-[(3-amino-2,3,6-tride...	NA	NA	0.315	0.0161	0.249
act	647050	Tris(1,3,10,12-tetraoxo-1,12-diphenyldodecanato)di- [neo...			0.349	0.0162	0.25
act	696126	MVIAFWFYXRNKDS-UHFFFAOYSA-N			0.335	0.0162	0.249
act	271271	12-Methoxy-3-(4-nitrophenyl)-3,4-diazatricyclo[8.4.0.02,6]tetradeca-1(14),2(6),4,10,12-pentaen-13-ol			0.326	0.0162	0.249
act	666707	2-bishydroxyimino-4-(4-morpholinyl)-1-phenylmethyl bicyc...			0.323	0.0162	0.249
act	678912	4-Acridinecarboxamide, N-[2-(dimethylamino)ethyl]- 8-met...			0.312	0.0162	0.249
act	73101	1,4,5,6,7,7-Hexachloro-3-((9H-fluoren-2-ylamino)carbonyl)bicyclo[2.2.1]hept-5-ene-2-carboxylic acid			-0.317	0.0162	0.25
act	709553	7-(Diethylamino)-2-imino-N-(2-methoxyphenyl)chromene-3-carboxamide			0.335	0.0163	0.25
act	695317	Ethyl 3-(4-methoxycarbonylphenoxy)quinoxaline-2-carboxylate			0.325	0.0163	0.251
act	627759	2'-Phenyl-17a-aza-D-homo-5-androsteno[17,16-c]pyrazol-3....	NA	NA	0.377	0.0164	0.251
act	650018	3-[3-Chloro-2-(4-nitrophenyl)-4-oxoazetidin-1-yl]quinazolin-4(3H)-one			0.348	0.0164	0.251
act	650641	1-(Ethylthio)-3-((2-(ethylthio)ethyl)thio)propane			0.345	0.0164	0.251
act	75603	b 80568	NA	NA	0.314	0.0164	0.251
act	762521	RO-4987655	PK:STK,MAP2K	Clinical trial	-0.314	0.0164	0.252
act	624725		NA	NA	0.403	0.0165	0.252
act	623978	2-(4-Bromophenyl)-4,5-bis(phenylsulfonyl)-7-oxa-1-azabicyclo[2.2.1]heptane			0.348	0.0165	0.252
act	628694	1H-Pyrazole-1-carboxaldehyde, 4,5-dihydro-3-(7-hydroxy- ...			0.322	0.0165	0.252
act	705084	4-butanediylDihydroguaiaretic acid			0.322	0.0165	0.252
act	767227		PK:Not Available		0.322	0.0165	0.252
act	655619	(3S,4S)-3-Acetyl-5-ethoxy-3,4-dimethyloxolan-2-one			0.408	0.0166	0.254
act	759006		NA	NA	0.328	0.0166	0.253
act	732836	1-[4-(1-benzyl-4-chloro-2,5-dioxo-2,5-dihydro-1H-3-pyrro...			0.316	0.0166	0.253
act	60044	4-[(5,6-Dichloro-1H-benzimidazol-2-yl)methylamino]benzoic acid;hydrochloride			-0.316	0.0167	0.254
act	613752	3-Methoxy-6-[(Z)-2-(7-methoxy-1,3-benzodioxol-5-yl)ethenyl]benzene-1,2-diol			0.34	0.0168	0.255
act	684700	2-Propen-1-one, 1-(5-hydroxy-3-phenyl- 1,2,3-oxadiazol-4...			0.31	0.0168	0.255
act	679198	((1-Benzyl-1H-benzimidazol-2-yl)hydrazono)(4-methoxyphenyl)acetic acid			0.313	0.0169	0.257
act	298223	cc-1065	NA	NA	0.313	0.0169	0.257
act	678532	2'-Azido-2'-deoxycytidine			0.31	0.0169	0.256
act	650043	2-(2-(2,4,5-Tris(2-(2-formylphenoxy)ethoxy)phenoxy)ethoxy)benzaldehyde			0.362	0.017	0.257
act	691656	2-[(9-Amino-5-methylacridine-4-carbonyl)amino]ethyl-dimethyl-[(4-methylsulfonylphenyl)methyl]azanium;chloride			0.315	0.017	0.257
act	800870	Ro-4987655	NA	NA	-0.312	0.017	0.257
act	634570	2-(2-Mercaptoanilino)benzonitrile			0.371	0.0171	0.258
act	52427	LS-144122			0.318	0.0171	0.258
act	735843	4,5,6,7-Tetrakis(p-tolyl)bicyclo[2.2.1]hept-5-ene-2,3-di...			0.315	0.0171	0.258
act	677951	3.beta.-Hydroxy-16.beta.-morpholino-5-androsten-17-one			0.312	0.0171	0.258
act	754240	2,9-dimethoxy-6-(2-(piperidin-1-yl)ethoxy)-11h-indeno[1,...			0.312	0.0171	0.258
act	624851	1,2-Dibromo-3,4-bis(dibromomethylene)cyclobutane			0.312	0.0171	0.258
act	321237	Mercury, (4-aminophenyl)(6-thioguanosinato-N7,S6)-			0.309	0.0171	0.258
act	621335		NA	NA	-0.346	0.0171	0.258
act	22984		NA	NA	0.32	0.0172	0.259
act	669341		NA	NA	0.314	0.0172	0.259
act	379880	Q27183503			0.312	0.0172	0.259
act	131263	4-(Dimethylaminodiazenyl)-5-ethyl-1H-pyrazole-3-carboxamide			0.314	0.0173	0.26
act	642198	antineoplastic-642198	NA	NA	0.309	0.0173	0.26
act	356232	Poly[1H-indole-3,1-diyl(diethylstannylene)oxy(1-oxo-1,2-...	NA	NA	-0.332	0.0173	0.26
act	736912	Ethyl 7-methyl-8-(2-methylpropyl)-4,5-dioxo-3H-pyrrolo[2,3-e]benzimidazole-6-carboxylate			0.332	0.0174	0.26
act	709993	5-Benzylsulfanyl-1-phenyl-6-thia-4-azaspiro[2.4]hept-4-en-7-one			0.328	0.0174	0.261
act	669520	Cryptolepinone			0.317	0.0174	0.26
act	708426	N-[3-Methoxy-4-(6H-pyrrolo[3,2-f]quinolin-1-ylmethylamino)phenyl]methanesulfonamide			0.317	0.0174	0.261
act	675223	1H-1,2,4-Triazole-5(4H)-one, 4-[[(4-nitrophenyl)methylen...			0.309	0.0174	0.26
act	688304		NA	NA	0.309	0.0174	0.261
act	623433	OVB3-PE	NA	NA	-0.349	0.0174	0.26
act	637207	cis-Dichlorobis[1-(4-methoxyphenyl)-3-phenylpropane-1,3-...	NA	NA	0.353	0.0175	0.261
act	281612	benzaldehyde (BEN)	A7	Clinical trial	0.335	0.0175	0.261
act	268925	Di-n-octyl-secalonsaure A	NA	NA	0.314	0.0175	0.261
act	675554	Uvidin A			0.311	0.0175	0.261
act	691415		NA	NA	0.308	0.0175	0.261
act	766601	mmv malaria box	NA	NA	-0.316	0.0175	0.261
act	705814	1-Methylsulfonyl-3-(1-methylsulfonyl-6,7-dihydro-5H-cyclopenta[c]pyridin-3-yl)-5,6,7,8-tetrahydroisoquinoline			0.328	0.0176	0.262
act	66211	n,n-Bis{[(4-chlorophenyl)sulfanyl]methyl}-4-methylaniline			0.319	0.0176	0.262
act	165707	1,4-Benzenediamine, N-9-acridinyl-, monohydrochloride			0.319	0.0176	0.262
act	741943	N,N-Diethyl-4-[3-(3,4,5-trimethoxyphenyl)-4,5-dihydro-1H-pyrazol-5-yl]aniline			0.316	0.0176	0.261
act	652179	(4E)-2-(2-Hydroxybenzoyl)-4-[(4-hydroxy-3-methoxy-phenyl)methylene]-5-methyl-pyrazol-3-one			0.313	0.0176	0.262
act	256926	hyrcanoside	NA	NA	0.308	0.0176	0.262
act	383031	Rutacridone epoxide			0.308	0.0176	0.262
act	656835	4-Methyl-1-(4-methyl-2-nitro-phenyl)sulfonyl-2-nitro-benzene			0.356	0.0177	0.262
act	639734		NA	NA	0.341	0.0177	0.262
act	730735	1-[(4,5-Dihydro-1H-imidazol-2-yloxy)amino]-4-methylcyclo...			0.325	0.0177	0.262
act	2061	3-(2-furyl)acrolein	NA	NA	0.311	0.0177	0.262
act	650366	5-(4-Bromophenyl)-2-(4-methoxyphenyl)-4,5,10,10b-tetrahydropyrrolo[3,4-a]carbazole-1,3(2H,3aH)-dione			0.364	0.0178	0.263
act	668429		NA	NA	0.348	0.0178	0.263
act	713290	2-[(3-Chloro-4-fluoroanilino)methyl]-4-[(E)-[5-(2,4-dichlorophenyl)furan-2-yl]methylideneamino]-5-methyl-1,2,4-triazole-3-thione			0.337	0.0178	0.263
act	688360		NA	NA	0.322	0.0178	0.262
act	635894	cis-Dichlorobis(1,3-diphenylpropane-1,3-dionato)hafnium(IV)	NA	NA	0.359	0.0179	0.264
act	294846	Cinnoline, 4-nitro-, 1-oxide			0.334	0.0179	0.264
act	719997	5-(5-benzylidene-3-phenyl-4-oxothiazolidin-2-ylidenyl)-3...			0.321	0.0179	0.264
act	42369	LS-144126			0.318	0.0179	0.264
act	116536	ARONIS002269			0.31	0.0179	0.264
act	638201	5-Amino-2-(1-naphthylamino)-1,3-thiazole-4-carbonitrile			0.355	0.018	0.264
act	8101	Inosite	NA	NA	0.327	0.018	0.264
act	678369	Methyl 2-[(E)-(5,6-dimethyl-1-oxo-indan-2-ylidene)methyl]-5-methyl-benzoate			0.324	0.018	0.264
act	757427	AMINOPTERIN			0.31	0.018	0.264
act	697150	1-(4-Methoxyphenyl)-3-[2-[4-[2-[3-(4-methoxyphenyl)-5-oxo-2-sulfanylideneimidazolidin-1-yl]-2-oxoethoxy]phenoxy]acetyl]-2-sulfanylideneimidazolidin-4-one			-0.333	0.018	0.264
act	211193	N-(3-(Hydroxy(oxido)amino)benzyl)-4-methylbenzenesulfonamide			0.315	0.0181	0.265
act	146109	Pseudourea, 2-[(10-methyl-9-anthryl)methyl]-2-thio-, mon...	NA	NA	0.312	0.0181	0.265
act	639366	1-[[3'-(Diethylamino)-2'-hydroxypropyl]amino]-4- [(2'',3...			0.307	0.0181	0.265
act	669884	1-[8-(3-Methoxyphenyl)-6,7-dimethyl-7,8-dihydro-6H-[1,3]dioxolo[4,5-g]chromen-6-yl]pyrrolidine			-0.312	0.0181	0.265
act	647620	trans-Dichloro-cis-dichlorobis(1-ethylimidazole)- platin...			0.376	0.0182	0.265
act	619990	(Z)-3-Iodo-6-(phenylmethoxymethoxy)hex-2-en-1-ol			0.351	0.0182	0.265
act	703874	N-[(E)-[(8R,9S,10R,13S,14S,17R)-13-Ethyl-17-ethynyl-17-hydroxy-1,2,6,7,8,9,10,11,12,14,15,16-dodecahydrocyclopenta[a]phenanthren-3-ylidene]amino]acridine-4-carboxamide			0.323	0.0182	0.265
act	276361	1H-Pyrrole-3,4-dimethanol, 1-(4-butylphenyl)-2,5-dimethy...			0.32	0.0182	0.265
act	748389	tris-n,n,n-{[3-(3-hydroxy-2-oxo-2h-pyridin-1-yl)-propyl]...			0.315	0.0182	0.265
act	693325		NA	NA	0.315	0.0182	0.265
act	755307	7-methoxy-3-(1-naphthyl)-2-phenylbenzo[d]imidazo[2,1-b][...	NA	NA	0.312	0.0182	0.265
act	72917	Brucine, dihydro-	NA	NA	0.312	0.0182	0.265
act	688023	Phosphorodiamidic acid, N,N-bis(2-bromoethyl)-, (1,4-dio...			0.309	0.0182	0.265
act	652181		NA	NA	0.309	0.0182	0.265
act	645307	3-(Benzyloxy)-8,9-dimethoxybenzo[c]phenanthridine			0.339	0.0183	0.266
act	645008	intoplicine			0.336	0.0183	0.265
act	628673	(5S,8Ar)-9-(4-hydroxy-3,5-dimethoxyphenyl)-5-(4-phenoxyanilino)-5a,6,8a,9-tetrahydro-5H-[2]benzofuro[5,6-f][1,3]benzodioxol-8-one			0.35	0.0184	0.266
act	354843	Albacarcin M	NA	NA	0.346	0.0184	0.266
act	657501	[(5S,9R,10R,14R,23S,26R,27S,28R,32S,35R)-5,5',9,23,27,29-Hexamethyl-10-(6-methylheptan-2-yl)spiro[31-oxa-2,20-diazadecacyclo[19.18.0.03,19.05,17.06,14.09,13.023,38.024,35.027,34.028,32]nonatriaconta-1			0.32	0.0184	0.266
act	710406	Diethyl 2-[[4-[(2,3-dimethoxyquinoxalin-6-yl)methylamino]naphthalene-1-carbonyl]amino]pentanedioate			0.317	0.0184	0.266
act	707063	(2Z,5Z)-3-(2-Benzhydrylidenehydrazinyl)-6-hydroxy-1,6-diphenylhexa-2,5-diene-1,4-dione			0.306	0.0184	0.266
act	713160	Triacetyl 13,14,15-isocrambescidin 800 hydrochloride			-0.317	0.0184	0.266
act	684810	N-((2-((4-Methylphenyl)sulfonyl)hydrazino)methyl)benzamide			0.311	0.0185	0.267
act	685891	N-(3-(1-Methyl-3H-benzimidazol-3-yl)-1,4-dioxo-1,4-dihydro-2-naphthalenyl)benzenesulfonamide			-0.308	0.0185	0.267
act	665369		NA	NA	-0.309	0.0185	0.267
act	109724	Ifosfamide	A7|AlkAg	FDA approved	0.332	0.0186	0.268
act	60387	tylocrebrin			0.325	0.0186	0.268
act	726974	5,6-Dihydro-6-(3-imidazolyl-1-propyl)-5,11-dioxo-11H-ind...			0.319	0.0186	0.268
act	665916		NA	NA	0.308	0.0186	0.268
act	339660	18-acetoxyaphidicolin	NA	NA	0.306	0.0186	0.268
act	709991	1-(1-Acetyl-1H-indol-3-yl)-5-phenyl-6-oxa-4-aza-spiro[2.4]hept-4-en-7-one			0.325	0.0187	0.268
act	661205	4-Hydroxy-2-isopropenyl-10-methyl-3,10-dihydrofuro[3,2-b]acridin-5(2H)-one			0.313	0.0187	0.268
act	768014		NA	NA	-0.311	0.0187	0.268
act	617640	5-(Dimethoxymethyl)-6-(2-methoxyvinyl)-1,3-benzodioxole			0.357	0.0188	0.269
act	639741		NA	NA	0.338	0.0188	0.269
act	180966	AGN-PC-0NI2ET			0.328	0.0188	0.269
act	741695	2-[2-[2-[2-[4-[6-[4-[2-[2-(2-Pyridin-2-ylethynyl)phenyl]ethynyl]phenoxy]hexoxy]phenyl]ethynyl]phenyl]ethynyl]pyridine			0.308	0.0188	0.269
act	717167	7-(2,5-Dimethoxyphenyl)-7,8,9,10-tetrahydropyrimido[4,5-c]isoquinoline-1,3-diamine			0.308	0.0188	0.269
act	800840	PD-325901	NA	NA	-0.308	0.0188	0.269
act	685894	(3Z)-3-(Benzenesulfonylimino)-2-(4-benzylpyridin-1-ium-1-yl)-4-oxonaphthalen-1-olate			-0.308	0.0188	0.269
act	625592	3-(3-(Trifluoromethyl)phenyl)naphtho[1,2-c]furan-1(3H)-one			0.39	0.0189	0.269
act	631391	7h-pyrido[4,3-c]carbazole-6-methanol,methylcarbamate (es...			0.341	0.0189	0.27
act	657592	1-Butyl-3-[(Z)-(2,4-dioxochroman-3-ylidene)methyl]thiourea			0.341	0.0189	0.27
act	657588	N~1~-((6-Methyl-2,4-dioxo-2H-pyran-3(4H)-ylidene)methyl)ethanedithioamide			0.341	0.0189	0.27
act	73413	chrome black s	NA	NA	0.328	0.0189	0.27
act	70929	hedamycin			0.31	0.0189	0.27
act	744469	3-cyano-3,3-diphenylpropyl 4-(3-[(11as)-7-methoxy-5-oxo-...			0.308	0.0189	0.269
act	116689		NA	NA	-0.325	0.0189	0.27
act	697193		NA	NA	0.31	0.019	0.27
act	372546		NA	NA	0.307	0.019	0.27
act	765615		NA	NA	-0.31	0.019	0.27
act	7821	capri blue			-0.313	0.019	0.27
act	363980	active compound from cephalodiscus gilchristi	NA	NA	0.327	0.0191	0.271
act	29638	N'-(4-Fluorophenyl)-2-(3-oxo-4H-1,4-benzothiazin-2-yl)acetohydrazide			0.312	0.0191	0.271
act	673297		NA	NA	0.312	0.0191	0.271
act	790516	;3-fluoro-6-(3-(4-hydroxypiperidin-1-yl)propyl)-9-methox...	NA	NA	0.31	0.0191	0.271
act	740	METHOTREXATE	Df|DHFR	FDA approved	0.304	0.0191	0.271
act	778590	Cobimetinib (isomer 1)	PK:MAP2K,MAP2K1	FDA approved	-0.31	0.0191	0.271
act	683584	(5R,8Ar,9R)-5-[(7,8-dihydroxy-2-propan-2-yl-4,4a,6,7,8,8a-hexahydropyrano[3,2-d][1,3]dioxin-6-yl)oxy]-9-(4-hydroxy-3,5-dimethoxyphenyl)-5a,6,8a,9-tetrahydro-5H-[2]benzofuro[6,5-f][1,3]benzodioxol-8-on			0.318	0.0192	0.272
act	684567	4,6(1H,5H)-Pyrimidinedione, 5-[3-[4-(diethylamino)phenyl...			0.307	0.0192	0.271
act	717707	(4R,8R,12R)-4,8,12-Tris(benzyloxymethyl)-1,5,9-triazacyclododecane-2,6,10-trione			0.304	0.0192	0.271
act	53398	A 8671K119	NA	NA	0.304	0.0192	0.272
act	660979	2-bromo-6-methyl-1,4,8-trimethoxynaphthalene			0.321	0.0193	0.272
act	749337	4-(4-chlorophenyl)-1-3-[(e)-3-(3-hydroxyphenyl)-2-propen...			0.309	0.0193	0.272
act	668341		NA	NA	0.307	0.0193	0.272
act	630604		NA	NA	0.351	0.0194	0.273
act	90903	N-[(Z)-[4-[Bis(2-chloroethyl)amino]-2-methylphenyl]methylideneamino]pyridine-3-carboxamide			0.314	0.0194	0.273
act	751271	N-[4-(4-Chlorophenyl)-1,3-thiazol-2-yl]-2-[1-(4-methoxyanilino)-4,5-dimethylimidazol-2-yl]sulfanylacetamide			0.309	0.0194	0.273
act	757926	3,5-bis(4-hydroxy-3-methoxystyryl)-n-(2,4-dimethylphenyl...	NA	NA	0.306	0.0194	0.273
act	747284	8-ethoxy-4-hydroxy-1-oxo-6-phenyl-1,2-dihydro-[2,7]napht...			0.306	0.0194	0.273
act	800844	Pexmetinib	NA	NA	-0.309	0.0195	0.273
act	696127	[(1R)-5-Amino-1-(chloromethyl)-1,2-dihydrobenzo[e]indol-3-yl]-(5,6,7-trimethoxy-1H-indol-2-yl)methanone			-0.309	0.0195	0.273
act	659547		NA	NA	0.308	0.0196	0.275
act	148790	olendrigenin	NA	NA	0.306	0.0196	0.275
act	782846	(thiophene-2,4-diylbis(furan-5,2-diyl))dimethanol	NA	NA	-0.306	0.0196	0.274
act	683852		NA	NA	0.314	0.0197	0.275
act	797928		NA	NA	0.306	0.0197	0.275
act	267469	Deoxydoxorubicin	TOP2		0.303	0.0197	0.275
act	659924	1-Amino-3-(2-methylallyl)-1-(2-naphthyl)thiourea			-0.311	0.0197	0.276
act	377174	YNS772IK61			0.313	0.0198	0.276
act	794456	;(E)-5-(dimethylamino)-2-(pyridin-2-yldiazenyl)phenol	NA	NA	0.305	0.0198	0.276
act	626540	1,3-Propanediamine, N-(2-chloroethyl)-N'-(2-methoxy-9- a...	NA	NA	0.303	0.0198	0.276
act	765613		NA	NA	-0.308	0.0198	0.276
act	732185	N-[(E)-[2-Chloro-6-(2,5-dimethoxy-4-nitrophenyl)imidazo[2,1-b][1,3]thiazol-5-yl]methylideneamino]pyridin-2-amine;hydrochloride			0.367	0.0199	0.278
act	128578	methanesulfonamide, n-[4-[(3-nitro-9-acridinyl)amino]phe...			0.308	0.0199	0.278
act	717090	(1r,5s)-1,7-Diphenyl-5-(phenylcarbonyl)-2-oxabicyclo[3.2.0]hept-6-ene-3,4-dione			0.305	0.0199	0.277
act	657587	STK264905			0.338	0.02	0.278
act	686791	ALBB-023764			0.308	0.02	0.278
act	742790	3,5-dimethyl-6-phenyl-8-(trifluoromethyl)-5,6-dihydropyr...			0.308	0.02	0.278
act	748265	N-[(E)-[4-(Diethylamino)-2-hydroxyphenyl]methylideneamino]-2-[4-[[2-(trifluoromethyl)pyridin-4-yl]amino]phenyl]acetamide			0.305	0.02	0.278
act	9704	lutex	NA	NA	-0.302	0.02	0.278
act	715971	(3s,5s)-4-(4-Methoxybenzyl)-3,5-diphenylhexahydro-1h-pyrrolizinium chloride			-0.322	0.02	0.278
act	622931	2-[(5-Chloro-8-hydroxy-1,4-dioxo-1,4-dihydronaphthalen-2-yl)sulfanyl]propanoic acid			0.386	0.0201	0.279
act	614539	1-(2-Aminophenyl)-3-(1H-indol-3-yl)propan-1-one			0.318	0.0201	0.279
act	352890	9-DEAZAADENOSINE			0.307	0.0201	0.278
act	163055	(E)-N,N-Dimethyl-2-(5-nitro-1,3,4-thiadiazol-2-yl)ethenamine			-0.335	0.0201	0.278
act	665915		NA	NA	0.307	0.0202	0.279
act	352299	2-methylellpticinium	TOP2		0.309	0.0203	0.281
act	658832	N-[2-(Dimethylamino)ethyl]-11-oxo-11H-indeno[1,2-b]quinoxaline-6-carboxamide			0.301	0.0203	0.281
act	776043	CEP-32496	PK:BRAF	Clinical trial	-0.307	0.0204	0.282
act	650263	9-Ethoxy-2,5,11-trimethyl-6H-pyrido[4,3-b]carbazol-2-ium acetate			0.33	0.0206	0.284
act	689530	N'-(2-Hydroxy-5-(hydroxy(oxido)amino)benzylidene)-1-piperidinecarbothiohydrazide			0.301	0.0206	0.284
act	624548	Benzamide, N-[[[4-[(5-bromo-2-pyrimidinyl)oxy]-3- chloro...			0.352	0.0207	0.285
act	687370	[5-(5-Fluoro-2,4-dioxopyrimidin-1-yl)-3-hydroxyoxolan-2-yl]methyl [5-[5-fluoro-4-(octadecylamino)-2-oxopyrimidin-1-yl]-2-(hydroxymethyl)oxolan-3-yl] hydrogen phosphate			0.311	0.0207	0.285
act	684043	Cysteine, S-[(4-aminocarbonyl-1H-imidazol-5-yl)azo]-			0.301	0.0207	0.285
act	785288	;13-(5',5'-diphenylpentyl) berberine chloride	NA	NA	-0.306	0.0207	0.285
act	685794	4,6-Dichloro-N-(2,3-dihydro-1H-inden-5-yl)-2-pyrimidinamine			-0.309	0.0207	0.285
act	708387	12-Bromo-10-thia-1-azoniatricyclo[7.4.1.05,14]tetradeca-1,3,5(14),6,8-pentaene;bromide			0.3	0.0208	0.286
act	9610	janus black			-0.329	0.0208	0.286
act	697129		NA	NA	0.314	0.0209	0.286
act	689865	4-((3-(Hydroxy(oxido)amino)-5-methoxy-9-acridinyl)amino)-N-(2-pyrimidinyl)benzenesulfonamide			0.308	0.0209	0.287
act	699167	3,4-Diacetoxycinnamic acid 2-[(3,4-diacetoxycinnamoyl)amino]ethyl ester			0.305	0.0209	0.286
act	757924	3,5-bis(4-hydroxy-3-methoxystyryl)-n-(4-bromophenyl)-1h-...	NA	NA	0.303	0.0209	0.286
act	625299	(Aminomethyl-ethyl-methyl-silyl)methanamine; dichloroplatinum			0.351	0.021	0.287
act	681132		NA	NA	0.308	0.021	0.287
act	761156		NA	NA	0.302	0.021	0.287
act	640674	S-Phenyl 3-[4-[bis(2-cyanoethyl)amino]phenyl]-2-[(2-chloro-5-nitrobenzoyl)amino]-3-phenylsulfanylpropanethioate			0.329	0.0211	0.288
act	720203	N-(2-Hydroxy-3-phenoxypropyl)-4-methyl-N-(2,3,5,6-tetrafluorophenyl)benzenesulfonamide			0.313	0.0211	0.289
act	777638	AZD-6738	PK:ATR	Clinical trial	0.31	0.0211	0.289
act	777389	5'-hydroxy-5-nitro indirubin oxime	NA	NA	0.305	0.0211	0.288
act	620322	4,6-Bis(methylsulfanyl)-1-(oxiran-2-ylmethyl)pyrazolo[3,4-d]pyrimidine			0.368	0.0212	0.289
act	276376	Formamide, N-[4-(3,3-dimethyl-1-triazenyl)phenyl]-			0.313	0.0212	0.289
act	681135	1,3-Bis[(Z)-[(E)-1-(4-chlorophenyl)-4,4-dimethyl-5-piperidin-1-ylpent-1-en-3-ylidene]amino]urea;hydrochloride			0.307	0.0212	0.289
act	699148	[10-[2-(Diethylamino)ethylamino]-8-oxo-1,14,15-triazatetracyclo[7.6.1.02,7.013,16]hexadeca-2(7),3,5,9,11,13(16),14-heptaen-5-yl] ethyl carbonate			0.305	0.0212	0.289
act	645645	antineoplastic-645645			0.305	0.0212	0.289
act	661196	Cyclopenta[c]thiophen-4-one, 6-amino-1,3-dibromo- 5-hydr...	NA	NA	0.3	0.0212	0.289
act	768017		NA	NA	-0.305	0.0212	0.289
act	716771	STK795136			0.322	0.0213	0.29
act	103508	1,3-Propanediamine, N,N'-bis[p-[bis(2-chloroethyl)amino]...			0.313	0.0213	0.289
act	741287	6-(phenylethynyl)-5-(3,4,5-trimethoxyphenyl)-2h-pyran-2-one			0.312	0.0214	0.291
act	689729	Tetramethyl 4,8-dioxothiopyrano[3,2-b]thiopyran-2,3,6,7-tetracarboxylate			0.302	0.0214	0.291
act	715453	3-Methyl-1-(4-nitrobenzoyl)-5-(2-phenylethyl)-2-[[4-tri(propan-2-yl)silyloxyphenyl]methyl]pyrrolidine-3-carbaldehyde			0.354	0.0215	0.291
act	667515	(3Z)-3-[[2-(1,3-Benzoxazol-2-yl)hydrazino]methylene]tetrahydrothiophene-2,4-dione			0.321	0.0215	0.291
act	45596	3-Hydroxy-4-[(4-nitrophenyl)diazenyl]-N-phenylnaphthalene-2-carboxamide			0.312	0.0215	0.291
act	637991	6H-Imidazo[4,5,1-de]acridin-6-one, 5-[[2-(dimethylamino)...			0.304	0.0215	0.291
act	675986	11H-Benzothiopyrano[2',3':5,6]pyrido[1,2-a]imidazole- 2-...			0.299	0.0215	0.291
act	730474	16-[4-(2-diethylaminoethoxy)3-methoxy benzylidene]-3a-py...			-0.338	0.0215	0.291
act	638434		NA	NA	0.334	0.0216	0.291
act	256927	CHIP	A7		0.299	0.0216	0.291
act	13314		NA	NA	-0.328	0.0216	0.291
act	641155	2,7-Dimethyl-phenothiazone			0.341	0.0217	0.292
act	681079		NA	NA	0.306	0.0217	0.292
act	652176	(4E)-2-(2-Hydroxybenzoyl)-5-methyl-4-[(3-nitrophenyl)methylene]pyrazol-3-one			0.304	0.0217	0.292
act	728085	6,7-Difluoro-2-(thien-2-yl)carbonyl-3-trifluoromethyl qu...			0.304	0.0217	0.292
act	652565	9-Chloro-2,3,5,11-tetramethyl-6H-pyrido[3,2-b]carbazol-4-ol methanesulfonate			0.301	0.0217	0.292
act	712741	1-(2-Chlorophenyl)-6-methoxy-3,9-dihydro[1,3]thiazolo[4,3-b]quinazoline			0.312	0.0218	0.293
act	709976	[2-Oxo-1-phenyl-2-[(5-phenyl-1,3,4-oxadiazol-2-yl)amino]ethyl] pyrrolidine-1-carbodithioate			0.309	0.0218	0.293
act	628498	9-N(N'-chloroethyl-N'-methyl-1,4-diaminobutyl) 2-methoxy...	NA	NA	0.303	0.0218	0.293
act	744673	3-peg fudr (peg floxuridine)	NA	NA	0.301	0.0218	0.293
act	177881	STL553706			0.337	0.0219	0.294
act	716803	N-[(E)-Benzylideneamino]-2-[(5-pyridin-2-yl-1,3,4-thiadiazol-2-yl)sulfanyl]acetamide			0.311	0.0219	0.293
act	762756		NA	NA	0.309	0.0219	0.294
act	638050	3-(4-Chlorophenyl)-4-[(E)-[5-(4-nitrophenyl)-2-furyl]methyleneamino]-1H-1,2,4-triazole-5-thione			0.348	0.022	0.295
act	697392		NA	NA	0.306	0.022	0.295
act	742306	1,6-dimethoxyphenanzine di-n-oxide			0.314	0.0221	0.295
act	684052	5-[(E)-Dimethylaminoazo]-1,3-dihydrobenzimidazol-2-one			0.303	0.0221	0.295
act	720529	N-(6'-Chrysenyl)-4-(1'-piperidinyl)-D-2,3-dioxalono-buta...			0.298	0.0221	0.295
act	716907	3-Benzyl-6-[[4-[(3-benzyl-[1,2,4]triazolo[3,4-b][1,3,4]thiadiazol-6-yl)methoxy]-2,5-dichlorophenoxy]methyl]-[1,2,4]triazolo[3,4-b][1,3,4]thiadiazole			0.297	0.0221	0.296
act	704393	HTS028333			0.297	0.0222	0.296
act	669160	1-azido-2-(2-pyridyl)-phenalen-3-one			0.308	0.0223	0.297
act	240579	4-(2-(4-(Dimethylamino)phenyl)vinyl)-8-quinolinol			0.302	0.0223	0.297
act	753164	7-O,8-O-Isopropylidene Iriomoteolide 3a			0.302	0.0223	0.297
act	787798	;3-Benzofurancarboxylic acid, 2-(3,4-dihydroxyphenyl)-2,...	NA	NA	0.302	0.0223	0.297
act	794221	;6-ethyl-5-(3-(2-methyl-7-(2-methylpyridin-4-yl)benzo[d]...	NA	NA	0.3	0.0223	0.297
act	280594	TRICIRIBINE PHOSPHATE	PK:STK	Clinical trial	0.297	0.0223	0.297
act	634492	4-(3,4-Dichlorophenyl)-2,6-dimethyl-N~3~,N~5~-diphenyl-1,4-dihydro-3,5-pyridinedicarboxamide			0.36	0.0224	0.298
act	623768		NA	NA	0.336	0.0224	0.298
act	716823	11-(4-Methoxyanilino)-4,5-dimethyl-6,10-dithia-1,8,12-triazatricyclo[7.3.0.03,7]dodeca-3(7),4,8,11-tetraen-2-one			0.307	0.0225	0.299
act	668498	1-(3-Chlorophenyl)-3-[(Z)-(2-oxoindolin-3-ylidene)amino]thiourea			0.304	0.0225	0.299
act	736832	6-(6-Aminohexyl)-5,6-dihydro-5,11-diketo-11H-indeno[1,2-...			0.299	0.0225	0.298
act	720205	N-(2-Fluorophenyl)-N-(2-hydroxy-2-phenylethyl)-p-toluenesulfonamide			0.313	0.0226	0.299
act	338269	permethyl deriv. of cristatic acid			0.31	0.0226	0.299
act	378840	Phytoene			0.302	0.0226	0.299
act	789115		NA	NA	0.299	0.0226	0.299
act	196473	Ametantrone			0.299	0.0226	0.299
act	645647	Benzamide riboside	NA	NA	0.296	0.0226	0.299
act	768013		NA	NA	-0.302	0.0226	0.299
act	784961		NA	NA	0.319	0.0227	0.3
act	65628	STK386853			0.301	0.0227	0.3
act	89172	2H-Tetrazolium, 3-(2-biphenylyl)-2,5-diphenyl- chloride			-0.302	0.0227	0.299
act	720612	8-[5-Amino-3-(4-methylphenyl)-1h-pyrazol-1-yl]-1,3-dimethyl-3,7-dihydro-1h-purine-2,6-dione			0.304	0.0228	0.3
act	652177	1-(2-Hydroxybenzoyl)-3-methyl-4-(4-hydroxybenzylidene)-2-pyrazoline-5-one			0.301	0.0228	0.3
act	790517	;3-fluoro-6-(3-(isopropylamino)propyl)-9-methoxy-5H-pyri...	NA	NA	0.301	0.0228	0.3
act	782183		NA	NA	0.299	0.0228	0.3
act	54849	1-[N'-[5-[(6-Methoxyquinolin-8-yl)amino]pentyl]carbamimidoyl]-2-propan-2-ylguanidine;hydrochloride			-0.299	0.0228	0.3
act	654828	Cambridge id 5133154			0.351	0.0229	0.301
act	708791	Bulbophyllanthrone			0.296	0.0229	0.301
act	649902	2-Methyl-4-[(2-methyl-1,3-dioxo-5H-pyrimido[1,6-a]benzimidazol-4-yl)diazenyl]-5H-pyrimido[1,6-a]benzimidazole-1,3-dione			0.335	0.023	0.302
act	710359	N-[(Z)-[Amino(pyridin-2-yl)methylidene]amino]-1,3-benzothiazole-2-carboxamide			0.301	0.023	0.302
act	690270	antineoplastic-690270			0.296	0.023	0.302
act	729607	N-[2-(Dimethylamino)ethyl]-11-oxo-[1,3]benzoxazolo[3,2-b]isoquinoline-2-carboxamide			-0.315	0.023	0.302
act	736181	5-nitro-2'-deoxy-5'-uridyl 4-nitrofurfuryl N-methyl-N-(4...			0.306	0.0231	0.303
act	128305	Kampferol-3,4'-dimethyl ether			0.301	0.0231	0.303
act	81747	1-((Benzylamino)methyl)-2-naphthalenethiol			0.298	0.0231	0.303
act	164371	STK209839			0.303	0.0232	0.303
act	761220		NA	NA	-0.303	0.0232	0.303
act	641241	2-Naphthalenebutanamide, alpha-,gamma-dioxo-beta-(3-oxo ...			0.327	0.0233	0.305
act	668024	Dibenzyl 2,2-bis((1,3-dioxo-1,3-dihydro-2H-isoindol-2-yl)methyl)malonate			0.33	0.0234	0.305
act	670123	Polyozellin			0.311	0.0234	0.305
act	675003	Benzofuran-3-carboxylic acid, 2,3-dihydro-7-hydroxy- 2-(...			0.303	0.0234	0.305
act	701661	Ethyl 4-oxo-3-phenyl-[1,2,3,5]tetrazino[5,4-a]indole-10-carboxylate			0.3	0.0234	0.305
act	633713	L-Ornithine, N.alpha.-[4-[[(2,4-diamino-6-pteridinyl)met...			0.295	0.0234	0.305
act	720338	Methyl 2-hydroxy-5-(2-methoxybenzyl)-6,11-dioxo-6,11-dihydro-5h-benzo[b]carbazole-1-carboxylate			0.3	0.0235	0.305
act	94889	Gardenin			0.3	0.0235	0.305
act	767259		PK:Not Available		0.3	0.0235	0.305
act	628910	3-(2-N,N-diethylaminoethylamino)-7-nitro-1,2,4- benzotri...			-0.311	0.0235	0.306
act	631672		NA	NA	0.353	0.0236	0.306
act	773206	N-[4-(4-Chloro-phenyl)-thiazol-2-yl]-3,4,5-trihydroxy-be...	NA	NA	0.305	0.0236	0.307
act	614495	B723735K022	NA	NA	0.294	0.0236	0.307
act	701103	ChemDiv3_000752			-0.308	0.0236	0.306
act	671954	1-(2-Phenyl-1,3,2,4-dioxaboralumetan-4-yl)-1-[(Z)-1-(2-pyridyl)ethylideneamino]thiourea			0.305	0.0237	0.308
act	673824		NA	NA	0.297	0.0237	0.308
act	700199	1-(5-(3-(1,3-Benzodioxol-5-yl)-5-phenyl-2-furyl)-2-thienyl)ethanone			0.333	0.0238	0.308
act	706833	1,3-Bis[4-(4-aminophenoxy)phenyl]adamantane			-0.302	0.0238	0.308
act	652935	3-(4-Methoxyphenyl)[1,2,4]triazolo[4,3-b][1,2]benzisothiazole			0.352	0.0239	0.308
act	653009	2-{[2-Chloro-4-(4-nitrophenyl)-3-oxoazetidin-1-yl]amino}-6-methylpyrimidin-4(1H)-one			0.352	0.0239	0.308
act	612828	(1R,2R,7S)-3,6-Dioxospiro[11,13,15-trioxatetracyclo[8.6.0.02,7.012,16]hexadeca-4,9-diene-14,1'-cyclohexane]-7-carbaldehyde			0.348	0.0239	0.308
act	171111	[6-(4-Methylbenzoyl)-1,2,4,5-tetrazin-3-yl]-(4-methylphenyl)methanone			0.329	0.0239	0.308
act	631306	cis-Amminedichloro(4-methoxyphenethylamine)platinum(II)			0.299	0.0239	0.309
act	763120		NA	NA	-0.296	0.0239	0.308
act	640335	2-Propen-1-one, 1-[2-[(3,4-dichlorophenyl)amino]- 4-meth...			0.336	0.024	0.31
act	610190	6H-Pyrido[4,3-b]carbazole, 5-hydroxymethyl-11-methyl-, N...			0.294	0.024	0.31
act	755763	Pimasertib	PK:STK,YK,MAP2K,MAP2K1,MAP2K2	Clinical trial	-0.296	0.024	0.31
act	76150		NA	NA	0.325	0.0241	0.31
act	352692	1,3-Benzodioxole, 5-[1-(4-methoxyphenyl)ethyl]-6-(2-prop...			0.307	0.0241	0.31
act	766408		NA	NA	-0.299	0.0241	0.31
act	768018		NA	NA	-0.299	0.0241	0.31
act	671310	2-((1-(3-(4-Chloroanilino)-3-oxopropanoyl)-3,5-diphenyl-1H-pyrazol-4-yl)diazenyl)benzoic acid			0.339	0.0242	0.31
act	625413	2-Methyl-3-(tris(phenylthio)methyl)cyclopentanone			0.328	0.0242	0.31
act	649153	4-Hydroxy-1-[2-(2-hydroxyethylamino)ethylamino]-10-imino-anthracen-9-one			0.322	0.0242	0.31
act	723733	7-methoxy-8-[2-(4-{2-[7-methoxy-5-oxo-(11aS)-2,3,5,11a-t...			0.298	0.0242	0.31
act	782968	8-Quinolinol, 5-[[1,4'-bipiperidin]-1'-ylmethyl]-	NA	NA	0.296	0.0242	0.31
act	676395	Cyclobutanemethanol, 1-[[(2-amino-4-chloro-5-[(4-chlorop...	NA	NA	0.293	0.0242	0.31
act	758119	(1r,6s,11as,13s,14ar)-1,13-dihydroxy-6-vinyl-1,6,7,8,9,1...	NA	NA	-0.296	0.0242	0.31
act	756879	Lificguat	HYP|HIF1|EPAS1	Clinical trial	-0.296	0.0242	0.31
act	13616	2-N-Cyclohexyl-1-N-(6-methoxyquinolin-8-yl)butane-1,2-di...			-0.322	0.0242	0.31
act	632023	1-Amino-3-[(Z)-[2-(5,7-dichloro-3-hydroxy-2-oxo-1H-indol-3-yl)-1,2-bis(4-methoxyphenyl)ethylidene]amino]urea			0.347	0.0243	0.31
act	735356	2,5-bis(4-methoxyphenyl)-1-(3,4,5-trimethoxyphenyl)-1H-i...			0.306	0.0243	0.31
act	699109		NA	NA	0.298	0.0243	0.31
act	741745	1,7-bis-(2,6,6-trimethylcyclohex-1-en-1-yl)-1(e)-heptadi...			0.296	0.0243	0.31
act	304425	tallysomycin s2b	NA	NA	0.296	0.0243	0.31
act	645429	Pyrrolo[3,2,1-hi]indole-7-carboxylic acid, 1-ethyl-1,2,4...			-0.328	0.0243	0.31
act	711889	(5Z)-3-[4-Benzoyl-2-[(4Z)-4-[(4-methylsulfanylphenyl)methylidene]-5-oxo-2-phenylimidazol-1-yl]phenyl]-5-[(4-methylsulfanylphenyl)methylidene]-2-phenylimidazol-4-one			0.306	0.0244	0.31
act	13977	Alizarin Blue S	NA	NA	0.306	0.0244	0.31
act	756227	gw416981x	NA	NA	0.301	0.0244	0.31
act	672437		NA	NA	0.3	0.0244	0.311
act	752278	2,7-bis-[2-(2,3,4-trimethoxy-benzylamino)-ethyl]-benzo[l...			-0.301	0.0244	0.31
act	625458	[4-[[Dimethyl(octadecyl)azaniumyl]methyl]phenyl]methyl-dimethyl-octadecylazanium;bromide			0.324	0.0245	0.311
act	169930		NA	NA	0.3	0.0245	0.311
act	671560	Methyl 2,3,4,6-tetra-O-galloyl-beta-D-glucopyranoside			0.295	0.0245	0.311
act	302325	2,4-Pyrimidinediamine, 5-(4-chloro-3-nitrophenyl)-6-ethyl-			0.293	0.0245	0.311
act	638438		NA	NA	0.342	0.0246	0.312
act	115892	Quinolin-8-ol; xanthen-9-one			0.364	0.0247	0.313
act	767226		PK:Not Available		0.3	0.0247	0.313
act	697653		NA	NA	0.292	0.0247	0.313
act	691824	1-[4-[4-[(5-Bromo-2,4-dioxopyrimidin-1-yl)methyl]triazol-1-yl]-5-(hydroxymethyl)oxolan-2-yl]-5-methylpyrimidine-2,4-dione			0.308	0.0249	0.315
act	711695	Tert-butyl 7-[[7-[7-acetamido-1-(chloromethyl)-5-hydroxy-1,2-dihydrobenzo[e]indol-3-yl]-7-oxoheptanoyl]amino]-1-(chloromethyl)-5-hydroxy-1,2-dihydrobenzo[e]indole-3-carboxylate			0.292	0.0249	0.315
act	4265	Phenanthroline hydrochloride	NA	NA	0.292	0.0249	0.315
act	116692		NA	NA	-0.368	0.0249	0.315
act	704128	IKESWEOGHPMERW-WSOKHJQSSA-			0.302	0.025	0.315
act	736049	N-[2-(4-methoxyphenyl)-4-oxo-1,3-thiazolidin-3-yl]-N'-(2...			0.302	0.025	0.316
act	798304	EC-330	MDM2	Clinical trial	0.294	0.025	0.315
act	711948	Acetamide, N,N'-[1,8-dioxo-1,8-octanediyldi[1-(chloromet...			0.292	0.025	0.316
act	201724	Bis(4-chlorophenyl)(methyl)phenylphosphanium iodide			-0.314	0.025	0.316
act	682763	1'-Hydroxy-2'-(naphthalene-1-carbonyl)-1'-naphthalen-1-ylspiro[1,3-dihydro-1-benzazepine-4,4'-cyclohexane]-2,5-dione			0.308	0.0251	0.316
act	7233	9,24-Dibromononacyclo[18.10.2.22,5.03,16.04,13.06,11.017,31.022,27.028,32]tetratriaconta-1(31),2,4,6(11),7,9,13,15,17,19,22(27),23,25,28(32),29,33-hexadecaene-12,21-dione			0.305	0.0251	0.316
act	667444		NA	NA	0.291	0.0251	0.316
act	736391	2-[2-[(N,N-diethylamino)thiocarbamoylthio]hexanoylamino]...			-0.307	0.0251	0.316
act	720444	2-[3-Oxo-5-phenyl-4-(phenylcarbonyl)furan-2(3h)-ylidene]-1,3-diphenylpropane-1,3-dione			0.296	0.0252	0.317
act	746754	3-[(Z)-(3-Benzyl-4-phenyl-1,3-thiazol-2-ylidene)amino]-2,5-dimethyl-4-oxothieno[2,3-d]pyrimidine-6-carboxamide			-0.296	0.0252	0.317
act	768019		NA	NA	-0.296	0.0252	0.316
act	645166	Diethyl 2-[[4-[[3-phenyl-7-(trifluoromethyl)quinoxalin-2-yl]methylideneamino]benzoyl]amino]pentanedioate			0.319	0.0253	0.317
act	675010	Rietone 1			0.31	0.0253	0.317
act	669713	[2-(Benzyloxycarbonylamino)-2-methyl-propanoyl] 2-(benzyloxycarbonylamino)-2-methyl-propanoate			0.307	0.0253	0.317
act	727212	11-[2'-N-Aminopropyl)-aminoethylidene]-5,6-dihydro-5-oxo...			0.294	0.0253	0.317
act	742851	[2-[[6-(1,2-Dihydroxyethyl)-2,2-dimethyl-3a,4,6,6a-tetrahydrofuro[3,4-d][1,3]dioxol-4-yl]oxy]-1-(6-dodecoxy-2,2-dimethyl-3a,5,6,6a-tetrahydrofuro[2,3-d][1,3]dioxol-5-yl)ethyl] N-phenylcarbamate			0.294	0.0253	0.317
act	73241	DNDI1417146			0.294	0.0253	0.317
act	116716		NA	NA	-0.31	0.0253	0.317
act	639595	Chloro(phenyl-4-carboxy-1-carboxylato)bis(1-phenylbutane...	NA	NA	0.337	0.0254	0.318
act	673836	1,1-Diethyl-3-[(E)-(2-hydroxy-5-methoxy-phenyl)methyleneamino]thiourea			0.299	0.0254	0.317
act	753579	n1-(6-methoxy-1,3-benzothiazol-2-yl)-2-2-methoxy-5-[(e)-...			0.296	0.0254	0.318
act	617966	2-Chloro-N-[2-(dimethylamino)ethyl]acridine-4-carboxamide;hydrochloride			0.336	0.0255	0.318
act	626174	5-Methyl-11-phenyl-benzo[d][1,3,6,2]benzodioxazaborocine			0.336	0.0255	0.318
act	650259	2,5,11-Trimethyl-9-(2,2,2-trifluoroethoxy)-6H-pyrido[4,3-b]carbazol-2-ium iodide			0.319	0.0255	0.318
act	724006	7-methoxy-8-{5-[7-methoxy-(11aS)-1,2,3,10,11,11a-hexahyd...			0.301	0.0255	0.318
act	622613	3H-Naphtho[1,8-bc]furan-2-carboxylic acid, 4,5-dihydro-6...			0.301	0.0255	0.318
act	696862	1H-1,4,7-Triazonine-1,4-diacetic acid, octahydro-			-0.291	0.0255	0.318
act	768016		NA	NA	-0.296	0.0256	0.318
act	645646	antineoplastic-645646			0.298	0.0257	0.32
act	781343	GDC-0994	PK:ERK,MAP3K,MAPK1	Clinical trial	-0.293	0.0257	0.32
act	101492	anthranilic acid, n-[p-[bis(2-chloroethyl)amino]benzylid...			0.382	0.0258	0.32
act	83216	Apocannoside			0.303	0.0258	0.32
act	719503	18-Methyl-14,15,18-triazatetracyclo[9.7.0.02,7.012,17]octadeca-1(11),2,4,6,12(17),15-hexaen-13-one			0.298	0.0258	0.32
act	667954	4-Chloro-2-((3-(5-chloro-2-hydroxybenzyl)-1-imidazolidinyl)methyl)phenol			0.298	0.0258	0.32
act	788356	;meso-tetra(6-methyl coumarin) calix[4]pyrroles	NA	NA	0.295	0.0258	0.32
act	777196	(5-(5'-(hydroxymethyl)-[2,2'-bifuran]-5-yl)thiophen-2-yl...	NA	NA	-0.295	0.0258	0.32
act	670564		NA	NA	-0.312	0.0258	0.32
act	639694	Combretastatin A-4, sodium salt			0.298	0.0259	0.32
act	672868		NA	NA	0.298	0.0259	0.32
act	626734	4-Piperidinone, 2,6-bis(4-methoxyphenyl)-3,5-dimethyl- 1...			0.292	0.0259	0.32
act	647614		NA	NA	0.292	0.0259	0.32
act	620326	(E)-N-(Oxiran-2-ylmethoxy)-3,4-dihydro-2H-naphthalen-1-imine			0.332	0.026	0.32
act	762557		NA	NA	0.321	0.026	0.32
act	635930	10-((3-(Diethylamino)propyl)amino)-6-methylisoquino[6,7-b][1,6]naphthyridin-12(5H)-one			0.318	0.026	0.32
act	699483	Methyl 8-(chloromethyl)-4-(dimethylamino)-6-(5,6,7-trimethoxy-1H-indole-2-carbonyl)-7,8-dihydro-3H-pyrrolo[3,2-e]indole-2-carboxylate			0.312	0.026	0.32
act	649814	5,5-Dimethyl-2-(3-oxo-5-phenyl-4-pentenyl)-1,3-cyclohexanedione			0.303	0.026	0.32
act	791210		NA	NA	0.292	0.026	0.32
act	683918	AB01329105-02			-0.295	0.026	0.32
act	645265	1-(2-(2,5-Dimethoxyphenyl)ethyl)-4,5-dimethoxy-2-methylbenzene			-0.352	0.026	0.32
act	249278	Carbamic acid, [5,6,7,9-tetrahydro-1,2,3-trimethoxy-10-(...	NA	NA	0.321	0.0261	0.32
act	743061	4-Iodo-2-methyl-6-[[methyl(2-pyrrolidin-1-ylethyl)amino]methyl]phenol;hydrochloride			0.295	0.0261	0.32
act	664870		NA	NA	0.292	0.0261	0.32
act	639015		NA	NA	-0.321	0.0261	0.321
act	713655	(9Z)-4-(1,3-Benzothiazol-2-yl)-6-(3-chlorophenyl)-8-methyl-9-[(E)-3-phenylprop-2-enylidene]-1-thia-4,6,7-triazaspiro[4.4]non-7-en-3-one			0.311	0.0263	0.323
act	900904	c(Xxx-(L-Glu)-Xxx-Xxx-(D-Asp)-) where Xxx = D- or L-Pro,...	NA	NA	0.294	0.0263	0.323
act	693130	(E,E)-1,4-bis(1-naphthyl)-2,3-dinitro-1,3-butadiene	NA	NA	0.292	0.0264	0.323
act	670013	Benzene-1,4-dicarboxamide, N,N'-bis[3-[(dimethylamino)me...	NA	NA	0.291	0.0264	0.324
act	628918	3-(2-N,N-diethylaminoethylamino)-7-nitro-1,2,4- benzotri...			0.289	0.0264	0.324
act	10594	N-(2,3-Dimethoxy-6-nitroacridin-9-yl)-N',N'-diethyl-2-phenylbutane-1,4-diamine;hydrochloride			-0.294	0.0264	0.324
act	378735	from cephalodiscus gilchristi			0.334	0.0265	0.324
act	724995	3-[(4-Hydroxyethylpiperidine)-1-propyl]-5,6-dihydro-2,3-...			0.294	0.0265	0.325
act	681827	DJAREVVDYFIGBP-UHFFFAOYSA-N			0.291	0.0265	0.324
act	620753	BCH-189	NA	NA	0.342	0.0266	0.325
act	643125	9-Hydroxy-2,5,11-trimethyl-10-(2,2,2-trifluoroethoxy)-6h-pyrido[4,3-b]carbazol-2-ium iodide			0.334	0.0266	0.325
act	49495	Adipic acid bis(N'-salicylidene hydrazide)			0.327	0.0266	0.325
act	152731	6H-Pyrido[4,3-b]carbazole, 5,11-dimethyl-6-(oxiranylmeth...			0.327	0.0266	0.325
act	687215	3-(4-Methylphenyl)-5-((3-(4-methylphenyl)-1H-1,2,4-triazol-5-yl)methyl)-1H-1,2,4-triazole			0.314	0.0266	0.325
act	782184		NA	NA	0.291	0.0266	0.325
act	664885		NA	NA	0.296	0.0267	0.325
act	38732	2-Amino-6-((5-(hydroxy(oxido)amino)-6-(methylamino)-4-pyrimidinyl)thio)-9H-purine			0.291	0.0267	0.325
act	676179	6-{[2-(4-Hydroxy-3-methoxyphenyl)ethyl]amino}-1h-benzimidazole-4,7-dione			-0.289	0.0267	0.325
act	650936	Hemigossypolone			-0.32	0.0267	0.325
act	640993	Methyl 4-(4-bromoanilino)-2-(6-chloro-3-hydroxy-2-quinoxalinyl)-3,4-dioxobutanoate			-0.346	0.0267	0.325
act	798705		NA	NA	0.299	0.0268	0.325
act	691081	STK849915			0.293	0.0268	0.326
act	718179	(3S,8R,9S,10R,13S,14S,16E,17S)-10,13-Dimethyl-16-[(4-nitrophenyl)methylidene]-3-pyrrolidin-1-yl-1,2,3,4,7,8,9,11,12,14,15,17-dodecahydrocyclopenta[a]phenanthren-17-ol			0.307	0.0269	0.326
act	689858	Acetophenone, 4'-[[2,5-dihydroxyphenyl)methyl]amino]-			0.304	0.0269	0.327
act	641319	antineoplastic-641319			0.341	0.027	0.327
act	623872	Methyl 4-(4-chloro-2-methylanilino)-4-oxobutanoate			0.316	0.027	0.328
act	720637	Ethyl 3-(4-chloro-5-methyl-2-sulfidophenylamino)-3-(4-di...			-0.31	0.027	0.327
act	122870	Methasquin	NA	NA	0.293	0.0271	0.329
act	666280	STK953642			-0.306	0.0271	0.329
act	363916	2,4-Thiazolidinedione, 3-[(dimethylamino)methyl]-5-[1-[(...			0.295	0.0272	0.329
act	680313	1,3-Bis(6-methoxy-2-naphthalenecarboxamido)propane			0.29	0.0272	0.329
act	617580	Zinc;2,4-dichloro-6-[(E)-[(2-hydroxybenzoyl)hydrazinylidene]methyl]phenolate			0.333	0.0273	0.33
act	727484	5-Methyl-N-phenyl-5H-indolo[2,3-B]quinolin-11-amine			0.306	0.0273	0.33
act	703545	3a-(Difluoromethyl)-5-(hydroxymethyl)-2,2-dimethyl-6,6a-dihydro-5h-furo[5,4-d][1,3]dioxol-6-ol			0.3	0.0273	0.33
act	640500	Neuro_000310			0.292	0.0274	0.331
act	168516	Benzene, 1,1'-(1,2-ethanediyl)bis[2,5-dimethoxy-			-0.287	0.0275	0.332
act	768407	(E)-1-(3,4-dimethoxyphenyl)-3-(3-(4-methoxyphenyl)-1H-py...	NA	NA	-0.3	0.0275	0.332
act	641239	N-[2-Chloro-5-(trifluoromethyl)phenyl]-4-naphthalen-2-yl-2,4-dioxo-3-(3-oxo-1H-2-benzofuran-1-yl)butanamide			0.315	0.0276	0.333
act	732838	1-[4-(1-benzyl-4-chloro-2,5-dioxo-2,5-dihydro-1H-3-pyrro...			0.302	0.0277	0.333
act	752703	(3Z)-1-(2,6-Dichlorophenyl)-3-[(4-hydroxy-3,5-dimethoxyphenyl)methylidene]indol-2-one			0.289	0.0277	0.333
act	782249	(6-amino-3-(4-methoxyphenyl)-1H-indazol-1-yl)(3,4,5-trim...	NA	NA	0.289	0.0277	0.333
act	725670	5,6-Dihydro-5,11-dioxo-6-(2-N-piperazine-1-ethyl)-11H-in...			0.302	0.0278	0.333
act	48890	KSC174Q0B			0.294	0.0278	0.333
act	690240		NA	NA	0.294	0.0278	0.333
act	689403	5,6-Dihydroxynaphthalene-2-carboxylic acid			0.292	0.0278	0.333
act	691244	[1-(Chloromethyl)-5-nitro-1,2-dihydrobenzo[e]indol-3-yl]-(5,6,7-trimethoxy-1H-indol-2-yl)methanone			0.289	0.0278	0.333
act	407807	gitoxigenin	NA	NA	0.287	0.0278	0.333
act	765611		NA	NA	-0.292	0.0278	0.333
act	194270	Cadmium;2-diphenylphosphorylacetic acid			-0.302	0.0279	0.335
act	640640	3-(2-(3-((4-Methylphenyl)thio)-1-butenyl)hydrazino)-5,6-diphenyl-2,5-dihydro-1,2,4-triazine			0.324	0.028	0.335
act	676315	(1-(((2-Amino-5-cyano-4-pyrimidinyl)amino)methyl)-3-(2-phenylethyl)cyclobutyl)methyl acetate			0.302	0.028	0.335
act	758540		NA	NA	0.299	0.028	0.335
act	692007	6-Amino-N-(4-chlorophenyl)-3-imino-4-mercapto-2,3-dihydro-1H-pyrazolo[4,3-c]pyridine-7-carboxamide			0.299	0.028	0.335
act	755265		NA	NA	0.291	0.028	0.335
act	749923	g-tpp	NA	NA	-0.289	0.028	0.335
act	647110		NA	NA	0.335	0.0281	0.335
act	130785	8-Aminoquinoline-5,6-dione			0.291	0.0281	0.335
act	727722	11-[2',3'-Diaminopropylidene]-5,6-dihydro-2,3-dimethoxy-...			0.289	0.0281	0.335
act	736611	N'-[3-(11H-Indolo[3,2-c]quinolin-6-ylamino)propyl]propane-1,3-diamine			0.288	0.0281	0.335
act	632859	Dichlorodiethoxy(2,4-pentanedionato)tantalum(V)	NA	NA	0.361	0.0282	0.335
act	693543	4-Acridinecarboxamide, 9-amino-N-[3-[(2-aminoethyl)amino...	NA	NA	0.286	0.0282	0.336
act	720285	2-(4-amino-3-(phenylacetylenyl)phenyl)benzothiazole			-0.293	0.0282	0.335
act	626306	Austrocortilutein			-0.327	0.0282	0.335
act	652733	Deoxyisoauriculatin			-0.343	0.0282	0.336
act	119889	2,3,4,5-tetrabromo-6-(3,6-dihydroxy-9H-xanthen-9-yl)benz...			0.293	0.0283	0.336
[truncated: 21,767 more rows]
